# Supplementary material for: The seahorse genome and the evolution of its specialized morphology
Source: PubMed Central journal article supplement (PMC8127814; doi:10.1038/nature20595), 2016-12-14
Supplement: 41586_2016_BFnature20595_MOESM68_ESM.pdf [file 41586_2016_BFnature20595_MOESM68_ESM.pdf]

## Table of contents

|                                                                                              |    |
|----------------------------------------------------------------------------------------------|----|
| 1. Genome sequencing and assembly .....                                                      | 2  |
| 1.1. DNA sample preparation and sequencing .....                                             | 2  |
| 1.2. Quality control of raw sequencing reads .....                                           | 2  |
| 1.3. Estimate the Genome Size using K-mer spectrum .....                                     | 3  |
| 1.4. Genome assembly .....                                                                   | 4  |
| 1.5. Quality control of <i>H. comes</i> genome assembly .....                                | 4  |
| 1.6. GC-content of <i>H. comes</i> genome .....                                              | 6  |
| 2. RNA sequencing .....                                                                      | 7  |
| 3. Genome analysis .....                                                                     | 11 |
| 3.1. Transposable element analysis .....                                                     | 11 |
| 3.2. Gene prediction and annotation.....                                                     | 13 |
| 3.3. Differential expression analysis .....                                                  | 16 |
| 4. Gene family evolution.....                                                                | 23 |
| 4.1. Gene family analysis .....                                                              | 23 |
| 4.2 Phylogenetic tree construction and divergence time estimate.....                         | 24 |
| 4.3 Expansion and contraction of gene families.....                                          | 24 |
| 4.4 Rate of molecular evolution .....                                                        | 25 |
| 5.Detection of positively selected genes .....                                               | 32 |
| 6.Loss of conserved noncoding elements (CNEs).....                                           | 40 |
| 7.Hox gene evolution .....                                                                   | 59 |
| 8.OR (olfactory receptors) genes in seahorse.....                                            | 63 |
| 9.Loss of <i>tbx4</i> in seahorse and generation of a <i>tbx4</i> mutant zebrafish line..... | 64 |
| 10.Description and analyses of specific gene families.....                                   | 76 |
| 10.1 Secretory calcium-binding phosphoprotein (SCPP) gene family.....                        | 76 |
| 10.2 The evolution of astacin metalloproteinase gene family .....                            | 78 |
| 11.References .....                                                                          | 85 |

## 1. Genome sequencing and assembly

### 1.1. DNA sample preparation and sequencing

**Supplementary Table 1.1** Statistics of Sequencing Data

| Insert size<br>(bp) | Raw data        |                   |                          |                          | Filter data     |                   |                      |                      |
|---------------------|-----------------|-------------------|--------------------------|--------------------------|-----------------|-------------------|----------------------|----------------------|
|                     | Reads<br>Length | Total<br>Data(Mb) | Sequence<br>Depth<br>(×) | Physical<br>Depth<br>(×) | Reads<br>Length | Total<br>Data(Mb) | Sequence<br>Depth(×) | Physical<br>Depth(×) |
| <b>170</b>          | 100             | 19760.94          | 28.72                    | 24.41                    | 100             | 15899.28          | 23.11                | 19.64                |
| <b>250</b>          | 150             | 63338.12          | 92.06                    | 76.72                    | 150             | 52679.57          | 76.57                | 63.81                |
| <b>500</b>          | 100             | 19077.93          | 27.73                    | 69.32                    | 100             | 14044.48          | 20.41                | 51.03                |
| <b>800</b>          | 100             | 17297.92          | 25.14                    | 100.57                   | 100_72*         | 11205.84          | 16.29                | 75.76                |
| <b>2K</b>           | 49              | 9595.81           | 13.95                    | 284.64                   | 49              | 7298.75           | 10.61                | 216.50               |
| <b>5K</b>           | 49              | 23958.49          | 34.82                    | 1776.70                  | 49              | 11399.10          | 16.57                | 845.33               |
| <b>10K</b>          | 49              | 24251.23          | 35.25                    | 3596.82                  | 49              | 12311.32          | 17.89                | 1825.96              |
| <b>20K</b>          | 49              | 41425.18          | 60.21                    | 12287.96                 | 49              | 7292.73           | 10.60                | 2163.24              |
| <b>Total</b>        | ---             | 218705.64         | 317.89                   | 18217.16                 | ---             | 132131.06         | 192.05               | 5261.27              |

\* The last 28 bp were trimmed due to sequencing error.

### 1.2. Quality control of raw sequencing reads

To prepare high quality data for *de novo* genome assembly of seahorse genome, the raw sequencing data were filtered using a combined strategy.

- 1) Filtered reads in which N constitutes more than 2% (for the short-insert libraries), 5% or 10% (for the mate-paired libraries) of read length or polyA structure reads.
- 2) Filtered low quality reads. Reads of short-insert libraries that have 40% bases with quality scores  $\leq 7$ ; reads of mate-paired libraries that have more than 30% or 40% bases with quality scores  $\leq 7$ .
- 3) Filtered reads with adapter contamination. Reads with more than 10 bp aligned to the adapter sequences (allowing less than or equal to 3 bp mismatches) were filtered.
- 4) Filtered short insert-size libraries (250 bp, 500 bp, 800 bp insertion size) in which forward and reverse reads overlapped  $\geq 10$  bp allowing 10% mismatches and Read1 and Read2 are both ends of one paired end reads.
- 5) Filtered PCR duplicates.
- 6) The raw reads were also corrected based on K-mer spectrum.

Finally, 132.131 Gb (around 192.05× coverage of seahorse genome) reads were achieved.

### 1.3. Estimate the Genome Size using K-mer spectrum

The genome size of seahorse was estimated based on K-mer spectrum<sup>1</sup>. Given the K-mer frequency obeys a Poisson distribution, when the coverage is sufficient, genome size can be estimated by:

$$\text{Genome Size} = K_{num}/K_{depth}$$

Where  $K_{num}$  is the number of K-mers, and  $K_{depth}$  is the expected depth of K-mers. In this study, the  $K_{num}$  is 23,386,207,821 based on 17 mers and  $K_{depth}$  is 34 (Supplementary Figure 1.1). Therefore, we estimated the seahorse genome size is around 688 Mb.

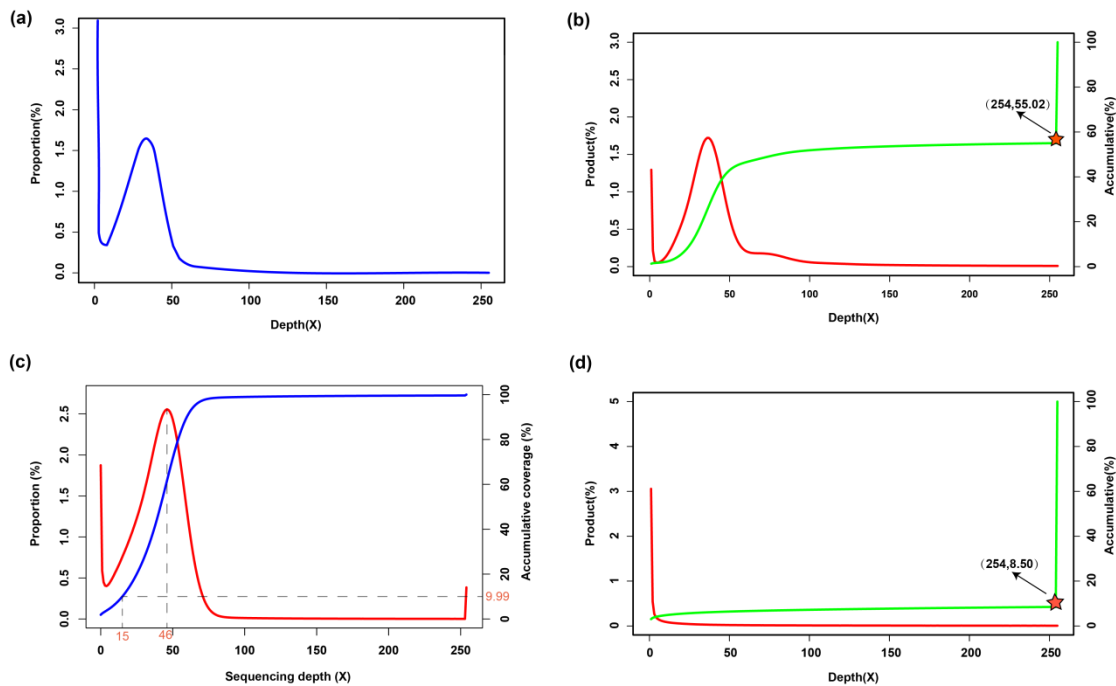

Supplementary Figure 1.1 Genome size and sequence depth estimation based on K-mer spectrum. The K-mer spectrum was constructed based on a 17 mer.

(a) K-mer spectrum of raw reads. The x-axis is the depth of K-mer; the y-axis is the proportion of K-mers. The peak of the distribution is 34. (b) The accumulative of depth coverage of K-mers. The x-axis is the depth of coverage, the red curve indicates the percentage of depth coverage (the left y-axis) and the green curve indicates the accumulated depth of coverage of K-mers. The figure shows that more than 44.98 % of the K-mer is in extreme high frequency with depth  $\geq 255$ , suggesting a high proportion of repeat element in the seahorse genome. (c) The depth coverage of the seahorse genome assembly. The cleaned reads from 170 bp, 500 bp, 800 bp libraries were mapped to the genome assembly using bwa. The X-axis is the depth of coverage; red

curve indicates the percentage of depth of coverage (left Y-axis) and blue curve is the accumulated percentage of depth of coverage (right Y-axis). From the figure, we can see the average depth coverage is 46 and 90% of the base's sequencing depth larger than 15. This indicates the assembly result has a high sequencing depth. (d) The K-mer spectrum of unmapped reads. We conducted the K-mer spectrum analysis using around 49.6 Million reads (~5× of the estimated genome size) that could not be mapped to the seahorse genome uniquely. The X-axis is depth coverage of K-mers, red curve indicates the percentage of depth of coverage (left Y-axis) and blue curve is the accumulated percentage of depth of coverage (right Y-axis). We found that more than 91% of the K-mers from the unmapped reads with high depth of coverage ( $\geq 255$ ).

#### 1.4. Genome assembly

The seahorse genome was assembled by SOAPdenovo2.04<sup>2</sup> using the default parameters<sup>1</sup>. Specifically, we first constructed the contigs using the filtered reads of paired-end libraries (170bp, 500bp, 800bp); the mate-paired reads were used to bridge the contigs; finally the assembly gaps were filled using the reads of paired-end libraries by GapCloser1.10. The final seahorse assembly is around 501 Mb (Supplementary Table 1.2).

**Supplementary Table 1.2** Summary of seahorse genome assembly.

|                               | Scaffold    |        | Contig      |         |
|-------------------------------|-------------|--------|-------------|---------|
|                               | Size (bp)   | Number | Size (bp)   | Number  |
| N50                           | 1,870,882   | 65     | 34,668      | 3,777   |
| N60                           | 1,431,692   | 96     | 26,559      | 5,317   |
| N70                           | 956,739     | 138    | 19,214      | 7,389   |
| N80                           | 670,863     | 201    | 12,586      | 10,378  |
| N90                           | 307,480     | 309    | 5,426       | 15,809  |
| Longest                       | 9,810,584   | ---    | 249,437     | ---     |
| Total Size                    | 501,592,652 | ---    | 467,148,839 | ---     |
| Total Number ( $\geq 100$ bp) | ---         | 94,070 | ---         | 119,536 |
| Total Number ( $\geq 2$ kb)   | ---         | 1,142  | ---         | 21,117  |

#### 1.5. Quality control of *H. comes* genome assembly

The quality of the assembled seahorse genome was assessed by CEGMA<sup>3</sup>, depth of coverage, and assembled transcriptome data. CEGMA evaluates completeness of genome assembly using a set of genes that are widely conserved in eukaryotic genomes. CEGMA analysis showed that 243 out of 248 genes are complete in the seahorse

genome assembly.

We estimated the depth of coverage of seahorse genome using the reads of paired-end libraries. In total, around 383 million reads were mapped to the seahorse genome assembly using bwa<sup>4</sup> version 0.5.9-r16 with the default parameters; and the depth of coverage was estimated using Soapcoverage (version 2.27) (<http://soap.genomics.org.cn/>). Soapcoverage suggested that around 334M (87.1%) reads, which covered 98.1% of the assembly, were mapped uniquely on the genome (Supplementary Table 1.3 and Supplementary Figure 1.1c). Based on the K-mer spectrum, we found that the reads with low mapping score were mainly originated from the repetitive regions in the genome (Supplementary Figure 1.1d).

The completeness of coding region in the seahorse genome was evaluated using the assembled RNA-seq transcripts. Specifically, the RNA-seq reads of *H. comes* were *de novo* assembled using Trinity<sup>5</sup> and mapped to the *H. comes* genome assembly using Blat<sup>6</sup>. The results showed that out of 77,040 transcripts, 76,757 transcripts could be mapped to the assembly (Supplementary Table 1.4).

### Supplementary Table 1.3 Read mapping results for *Hippocampus comes* genome

| Species                  | Genome size(bp) | Effective size (bp) | Covered base (bp) | Total reads (M) | Mapped reads (M) | Reads map (%) | Coverage (%) |
|--------------------------|-----------------|---------------------|-------------------|-----------------|------------------|---------------|--------------|
| <i>Hippocampus comes</i> | 501,592,652     | 467,151,988         | 458,422,072       | 384.30          | 334.74           | 87.1          | 98.1         |

**Genome size:** the total scaffold length; **Effective size:** the total contig length; **Covered bases:** the contig length were covered by reads; **Total reads:** the number of reads; **Mapped reads:** the number of mapped reads; **Reads map:** percentage of mapped reads; **Coverage:** percentage of Covered bases/Effective size

**Supplementary Table 1.4** Assessment of the completeness of coding region using transcriptome data in the seahorse genome.

| Dataset | Number | Total Length (bp) | Base covered by Assembly (%) | Sequence covered by Assembly (%) | With >90% sequence in one Scaffold |             | With >50% Sequence in one Scaffold |             |
|---------|--------|-------------------|------------------------------|----------------------------------|------------------------------------|-------------|------------------------------------|-------------|
|         |        |                   |                              |                                  | Number                             | Percent (%) | Number                             | Percent (%) |
| All     | 77,040 | 59,709,227        | 98.48                        | 99.80                            | 72,510                             | 94.12       | 76,757                             | 99.63       |
| >200bp  | 77,040 | 59,709,227        | 98.48                        | 99.80                            | 72,510                             | 94.12       | 76,757                             | 99.63       |
| >500bp  | 35,208 | 46,589,365        | 98.40                        | 99.95                            | 32,408                             | 92.05       | 35,105                             | 99.71       |
| >1000bp | 17,796 | 34,371,389        | 98.28                        | 99.97                            | 16,026                             | 90.05       | 17,730                             | 99.63       |

### 1.6. GC-content of *H. comes* genome

The GC content of the seahorse genome was estimated using a sliding window approach. Briefly, a 500 bp (250 bp stepwise) sliding window was employed to scan along the genome and calculate the GC content. We found that the average GC content of seahorse genome is about 43%, which is within range of the contents in other teleost genomes (Supplementary Figure 1.2).

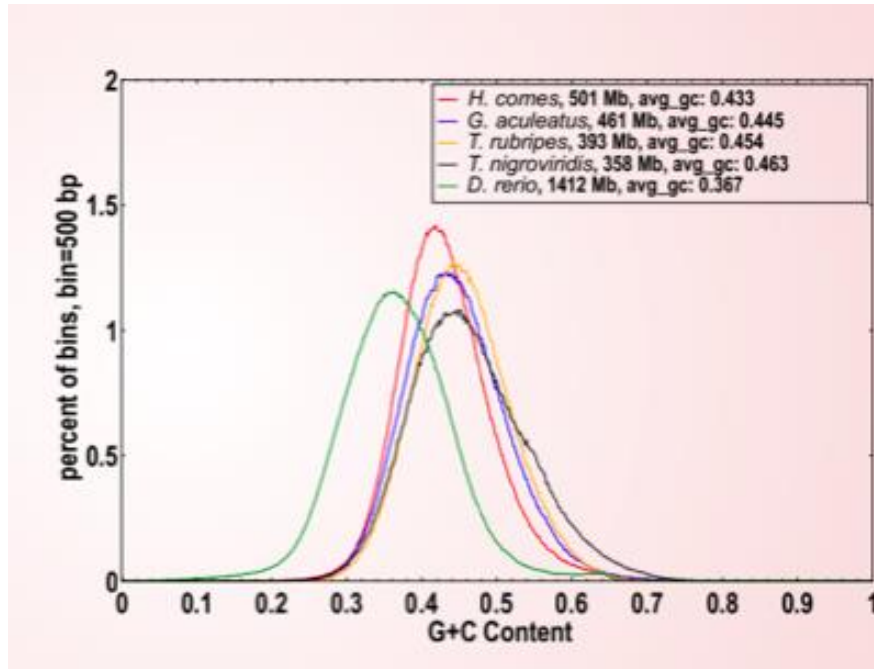

**Supplementary Figure 1.2** GC content in teleost genomes. The x-axis is GC content and the y-axis is the proportion of the windows number divided by the total windows. The GC content was calculated using a 500 bp sliding window (250 bp stepwise). The figure shows that the GC content in the seahorse genome is around 43%.

## 2. RNA sequencing

In total, 19 RNA-seq libraries were constructed in this study, including two libraries of combined soft-tissues (brain, gills, intestine, liver, and muscle) from a male and a female *H. comes* (Supplementary Table 2.1) and 17 libraries of five developmental stages of embryos and different stages of brood pouch development such as juvenile stage, rudimentary stage, pre-pregnancy stage, pregnancy stage, and post pregnancy stage, using RNAs from lined seahorse (*Hippocampus erectus*).

We defined the development periods of seahorse in this study as:

- The juvenile stage (Juv): male seahorse with a swell of brood pouch (3 months post birth).
- The rudimentary stage (Rud): male seahorse with the rudimentary brood pouch (5 months post birth).
- The pre-pregnancy stage (PreP): male seahorse with mature brood pouch (7 months post birth).
- The pregnancy stage (P): pregnant seahorse that carries 10 day embryos in the brood pouch (8 months post birth).
- The post-pregnancy stage (PostP): male seahorse that has released their offspring for 10 days, but is not pregnant again.

The libraries (insertion size 200 bp) were sequenced 90 bp at each end using Illumina HiSeq 2000 platform. On average we achieved at 46 million reads per library (Supplementary Table 2.2). The RNA-seq reads were mapped to the seahorse genome using Tophat<sup>7</sup> with default parameters, and subsequently analyzed using in-house Perl scripts.

**Supplementary Table 2.1** Transcriptome (*H. comes*) sequencing data statistics.

| Sample | Total reads | Total Map | Total Map Rate | Unip Map | Uniq MapRate |
|--------|-------------|-----------|----------------|----------|--------------|
| Female | 40898690    | 37596130  | 91.93          | 23343832 | 57.08        |
| Male   | 36911215    | 33462284  | 90.66          | 20261470 | 54.90        |

**Supplementary Table 2.2** Transcriptome (*H. erectus*) sequencing data statistics.

| Sample | TotalReads | TotalMap | TotalMapRate | UnipMap | UniqMapRate |
|--------|------------|----------|--------------|---------|-------------|
|--------|------------|----------|--------------|---------|-------------|

|                     |          |          |       |          |       |
|---------------------|----------|----------|-------|----------|-------|
| <b>Juv_brain</b>    | 46899916 | 22525693 | 48.03 | 15309074 | 32.64 |
| <b>Juv_haslet</b>   | 47196974 | 26944066 | 57.09 | 14875733 | 31.52 |
| <b>Juv_body*</b>    | 47040770 | 29655932 | 63.04 | 17483683 | 37.17 |
| <b>Rud_brain</b>    | 46694266 | 22087677 | 47.30 | 15025424 | 32.18 |
| <b>Rud_testis</b>   | 47692406 | 28168264 | 59.06 | 16593891 | 34.79 |
| <b>Rud_pouch</b>    | 47058460 | 28783113 | 61.16 | 18279269 | 38.84 |
| <b>PreP_brain</b>   | 47238606 | 23941010 | 50.68 | 15878562 | 33.61 |
| <b>PreP_testis</b>  | 49013880 | 25548191 | 52.12 | 16000354 | 32.64 |
| <b>PreP_pouch</b>   | 47510960 | 26423550 | 55.62 | 15955969 | 33.58 |
| <b>P_brain</b>      | 48913948 | 27923325 | 57.09 | 17599469 | 35.98 |
| <b>P_testis</b>     | 46977462 | 28621017 | 60.92 | 16658010 | 35.46 |
| <b>P_pouch</b>      | 46843472 | 28709020 | 61.29 | 16404319 | 35.02 |
| <b>PostP_brain</b>  | 46927064 | 23398448 | 49.86 | 15336865 | 32.68 |
| <b>PostP_testis</b> | 47019804 | 25720942 | 54.70 | 15821227 | 33.65 |
| <b>PostP_pouch</b>  | 47066354 | 27468918 | 58.36 | 16802317 | 35.70 |

\*The brood pouch of male seahorse was at the juvenile period (only a swell); so the tissue for transcriptome sequencing was the mixture of trunk and brood pouch.

Since brood pouch is not fully developed at the juvenile stage, we used a mix of trunk and brood pouch instead.

**Supplementary Table 2.3** Transcriptome sequencing data statistics of *H. erectus* embryos

| Sample              | TotalReads | TotalMap | TotalMapRate | UnipMap  | UniqMapRate |
|---------------------|------------|----------|--------------|----------|-------------|
| 1-dpf Embryos       | 44906940   | 21040127 | 46.85        | 11918296 | 26.54       |
| 3-dpf Embryos       | 49040172   | 32147158 | 65.55        | 18117665 | 36.94       |
| 10-dpf Embryos      | 43469846   | 27518854 | 63.31        | 15973425 | 36.75       |
| 1-day-old juvenile* | 46845740   | 29620332 | 63.23        | 15961025 | 34.07       |

\* young seahorse one day after hatching from the brood pouch. dpf, day(s) post fertilization.

A heatmap depicting the expression profile of astacin family genes in the brain, testis and brood pouch of *Hippocampus erectus* at four developmental stages is shown in [Supplementary Figure 2.1a](#). Out of the six *pastn* genes identified in the genome assembly of *H. comes*, we could identify orthologues for five genes (*pastn1*, *pastn2*, *pastn3*, *pastn5* and *pastn6*) in the RNA-seq data of *Hippocampus erectus* ([Supplementary Figure 2.1b](#)).



a

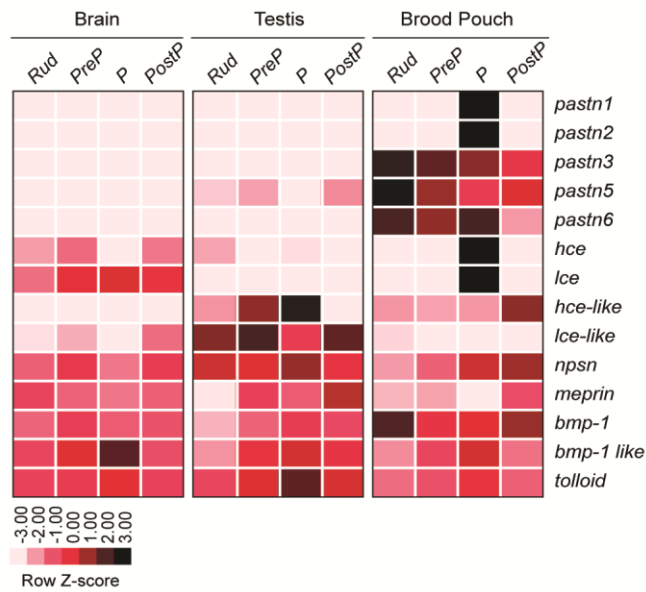

b

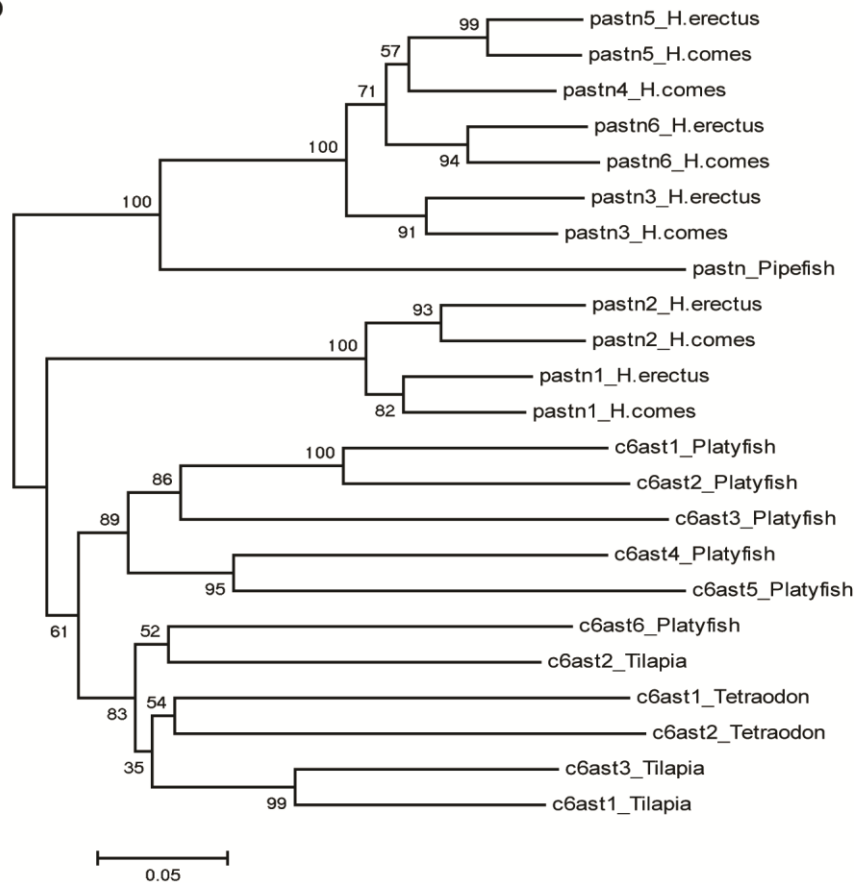

**Supplementary Figure 2** Expression profile of astacin genes in the brain, testis and brood pouch at different developmental stages of the Lined seahorse (*Hippocampus erectus*) and their relationships to *H. comes* *pastn* genes. **(a)** The heat map based on RNA-seq generated for *Hippocampus erectus*. Rud, rudimentary brood pouch (5 months-old immature fish); PreP, pre-pregnant brood pouch (7 months-old); P, pregnant

brood pouch (8 months-old) and PostP, post parturition (10 days after parturition, but not pregnant again). **(b)** Phylogenetic tree (Neighbor-joining) of protein sequences of *pastn* and related genes in *Hippocampus comes* (*H. comes*), *Hippocampus erectus* (*H. erectus*) and other fishes (also see [Figure 4](#) in the main text).

### 3. Genome analysis

#### 3.1. Transposable element analysis

We constructed a transposable element (TE) library of *H. comes* genome using a combination of homology-based and *de novo* approaches.

- 1). Tandem repeats were identified using Tandem Repeats Finder (version 4.04, <http://tandem.bu.edu/trf/trf.html>)<sup>8</sup>. (Supplementary Table 3.1).
- 2). RepeatMasker(version 3.3.0, <http://www.repeatmasker.org/>) and RepeatProteinMask were employed to identify TE based on homologous search against a library of Repbase<sup>9</sup> (Release 16.03) using the parameters“-nolow -no\_is -norna -parallel 1” and “-noLowSimple -pvalue 1e-4”
- 3). Ab initio TE library was constructed by RepeatModeler version 1.08 (<http://www.repeatmasker.org/RepeatModeler.html>) using the default parameters. RepeatModeler identifies repeat elements by integrating two repeat finding programs RECON<sup>10</sup> and RepeatScout<sup>11</sup>. Using the repeat library constructed by RepeatModeler, we estimated the repeat content of seahorse genome using RepeatMasker version 4.0.5 with the sensitive mode (-s). The transposable element (TE) expansion history was constructed by first recalculating the divergence of the identified TE copies in the genome with the corresponding consensus sequence in the TE library using Kimura distance<sup>12</sup> and then estimated the percentage of TE in the genome at difference divergence levels.

Around 24.8% (124.50 Mb) of the tiger tail seahorse (*H. comes*) genome comprises of TEs (Supplementary Table 3.1). Although its genome is relatively small in comparison to other teleost fishes such as zebrafish, tilapia and mudskipper (Supplementary Table 3.2), the TE repertoire in the seahorse genome, estimated by the number of TE super-families, shows a wide range of diversity, which is a common feature in ray-finned fish genomes<sup>13</sup>. The class II DNA transposon, covered around 9% (45 Mb) of the genome, is the most abundant class (Supplementary Table 3.1).

**Supplementary Table 3.1** TE Content in the *H. comes* genome.

| Class                      | Transposable element families | Percentage | Total length (Mb) |
|----------------------------|-------------------------------|------------|-------------------|
| Class I<br>Retrotransposon | Ngaro                         | 1.02       | 5.10              |
|                            | Pao                           | 0.02       | 0.08              |
|                            | Gypsy                         | 0.16       | 0.79              |
|                            | ERV1                          | 0.04       | 0.18              |
|                            | ERVK                          | 0.03       | 0.15              |
|                            | L1                            | 0.01       | 0.04              |
|                            | RTE                           | 0.15       | 0.74              |
|                            | Rex-Babar                     | 0.45       | 2.25              |
|                            | L2                            | 0.98       | 4.91              |
|                            | Jockey-I                      | 0.03       | 0.13              |
|                            | Dong-R4                       | 0.06       | 0.31              |
|                            | R2                            | 0.01       | 0.05              |
|                            | Penelope                      | 0.12       | 0.62              |
|                            | SINE                          | 0.21       | 1.05              |
|                            | Deu                           | 0.01       | 0.04              |
|                            | tRNA-V                        | 1.70       | 8.53              |
|                            | MIR                           | 0.06       | 0.28              |
|                            | CMC                           | 0.12       | 0.60              |
|                            | Ginger                        | 0.07       | 0.36              |
|                            | Class II DNA<br>transposons   | Harbinger  | 0.07              |
| hAT                        |                               | 4.46       | 22.38             |
| Maverick                   |                               | 0.01       | 0.03              |
| DNA                        |                               | 0.48       | 2.43              |
| MULE                       |                               | 0.14       | 0.68              |
| PiggyBac                   |                               | 0.03       | 0.16              |
| Sola                       |                               | 0.15       | 0.77              |
| TcMar                      |                               | 3.60       | 18.06             |
| RCHelitron                 | 0.00                          | 0.02       |                   |
| Unknown                    | 10.64                         | 53.38      |                   |
| Total                      |                               | 24.82      | 124.50            |

**Supplementary Table 3.2** Transposable element content in selected teleost fish genomes.

| Species                       | Genome size (Gb) | TE content (%) | Reference |
|-------------------------------|------------------|----------------|-----------|
| <i>Danio rerio</i>            | 1.40             | 50             | 14        |
| <i>Takifugu rubripes</i>      | 0.33             | 2.7            | 15        |
| <i>Oryzias latipes</i>        | 0.70             | 16             | 16        |
| <i>Gadus morhua</i>           | 0.75             | 18             | 17        |
| <i>Oreochromis niloticus</i>  | 1.10             | 18.75          | 18        |
| <i>Xiphophorus maculatus</i>  | 0.67             | 4.8            | 19        |
| <i>Gasterosteus aculeatus</i> | 0.46             | 25             | 20        |
| <i>Scartelaos histophorus</i> | 0.80             | 41.25          | 21        |

### 3.2. Gene prediction and annotation

An evidence-based gene prediction approach was used to create gene models for seahorse.

RNA-seq data provide a good supplement for gene model prediction, as a large number of gene models based on homologous prediction did not have intact open reading frames (ORFs). We used *H. comes* transcripts (female\_transcript and male\_transcript) and *Hippocampus erectus* transcripts (Juv\_brain, Juv\_body, Rud\_testis and PreP\_pouch) to assist the gene model prediction. The RNA-seq reads were assembled into transcripts using the following steps.

1. The raw reads were placed on the genome using TopHat<sup>7</sup> with the default parameters and assembled into transcripts using Cufflinks<sup>22</sup>.
2. The assembled transcripts were used to refine the gene models of homology-based approach that the overlapping gene models of RNA-seq and homology-based approach were merged.
3. We also predicted gene models using the transcripts that didn't overlap with the homology-based models. A fifth-order Markov model was trained using 1,000 intact gene models of the homology-based approach and was used to predicted ORF of RNA transcripts.

Finally, 23,458 gene models were produced ([Supplementary Table 3.3](#)).

**Supplementary Table 3.3** Summary of predicted gene models in the seahorse genome. The final gene set of seahorse genome was created by merging the gene models based

on homologous predictions and on the RNA-seq data of seahorse.

| Geneset        |                        | GN     | AGL      | ACL     | AEN  | AEL    | AIL     |
|----------------|------------------------|--------|----------|---------|------|--------|---------|
|                | <i>D. rerio</i>        | 24,829 | 7265.28  | 1242.95 | 7.14 | 174.08 | 980.78  |
|                | <i>G. aculeatus</i>    | 23,227 | 7788.12  | 1294.06 | 7.75 | 166.94 | 961.88  |
| Homolog        | <i>O. latipes</i>      | 41,541 | 4191.12  | 779.02  | 4.68 | 166.29 | 926.02  |
|                | <i>T. rubripes</i>     | 20,736 | 8696.64  | 1436.91 | 8.51 | 168.86 | 966.76  |
|                | <i>T. nigroviridis</i> | 19,963 | 8478.18  | 1405.11 | 8.49 | 165.5  | 944.35  |
| Transcripts    | Transcripts_v1         | 21,996 | 10771.84 | 1350.76 | 8.39 | 160.95 | 1062.12 |
|                | Transcripts_v2         | 16,540 | 12106.54 | 1558.14 | 9.19 | 169.5  | 982.25  |
| Final gene set |                        | 23,458 | 9874.1   | 1419.26 | 8.33 | 170.31 | 1040.17 |

GN: Gene Number; AGL: Average Gene Length; ACL: Average CDS Length; AEN: Average Exon Number; AEL: Average Exon Length; AIL: Average Intron Length; Transcripts\_v1: the longest ORF from 6 way of phase; Transcripts\_v2: the predicted ORF based on a fifth-order Markov model.

We annotated the predicted gene models using Swiss-Prot<sup>23</sup>, TrEMBL<sup>23</sup>, NCBI NR database, and KEGG<sup>24</sup> databases (Supplementary Table 3.4) using the following steps:

- The gene symbol and pathway were assigned based on the best blast hit against Swiss-Prot and KEGG databases.
- The motifs and domains in protein sequences were annotated using InterProScan<sup>25</sup> by searching publicly available databases, including Pfam, PRINTS, PANTHER, PROSITE, ProDom, and SMART.
- Gene Ontology<sup>26</sup> terms were assigned using by Blast2GO<sup>27,28</sup>.

**Supplementary Table 3.4** The number of gene model that can be annotated using different databases.

|          | Number | Percent (%) |
|----------|--------|-------------|
| InterPro | 16,648 | 70.97       |
| Nr       | 20,559 | 87.64       |

---

|              |        |       |
|--------------|--------|-------|
| KEGG         | 14,535 | 61.96 |
| Swissprot    | 18,039 | 76.90 |
| TrEMBL       | 21,718 | 92.58 |
| Annotated    | 22,245 | 94.83 |
| Un-annotated | 1,213  | 5.17  |
| Total        | 23,458 | 100   |

---

### 3.3. Differential expression analysis

#### 3.3.1 Differential expression genes in seahorse (*Hippocampus erectus*) brood pouch

To have a better understanding of the evolution and development of brood pouch in seahorse, we systematically examined the dynamic of gene expression at four developmental stages, including rudimentary (Rud), pre-pregnancy (PreP), pregnancy (P), and post-pregnancy (PostP) stages. Besides, the RNA sample from the mixture of trunk and brood pouch at the juvenile period (Juv\_body) was also included into the analysis as a stage before the development of brood pouch. The stage differential expression genes were detected a method reported by Yu et al<sup>29</sup>. Briefly, the expected number of reads for each gene at stage  $i$  is equal to:

$$f_i = E(g)p_i$$

where  $E(g)$  is the total number of the RNA-seq reads at different stages,  $p_i$  is the proportion of the RNA-seq reads at stage  $i$  to the total number of reads.

We calculated the expect enrichment (EE) for each gene ( $g$ ) at stage  $i$  as  $EE_i(g)=e_i(g)/f_i(g)$ , which is ratio of the observed and expected number of reads for gene  $g$ . A larger EE score indicates gene  $g$  is differentially expressed at stage  $i$ . The statistical significance of EE score was calculated using

$$p_i(g) = \sum_{x=e_i(g)}^{E(g)} \binom{E(g)}{x} p_i^x (1 - p_i)^{E(g)-x}$$

where  $x$  is the number of reads at stage  $x$ ,  $E(g)$  is the total number of reads of all stages. In this study, we defined differential expression genes at stage  $i$  are with  $EE_i(g) > 3$  and  $p\text{-value} < 0.01$ . We also filtered out genes that were lowly expressed ( $RPKM < 2$ ) at all five stages.

In total, we identified 927, 105, 46, 119 and 31 tissue-specific differential expression genes in Juv\_pouch, Rud\_pouch, PreP\_pouch, P\_pouch and PostP\_pouch respectively (Supplementary Figure 3.1)



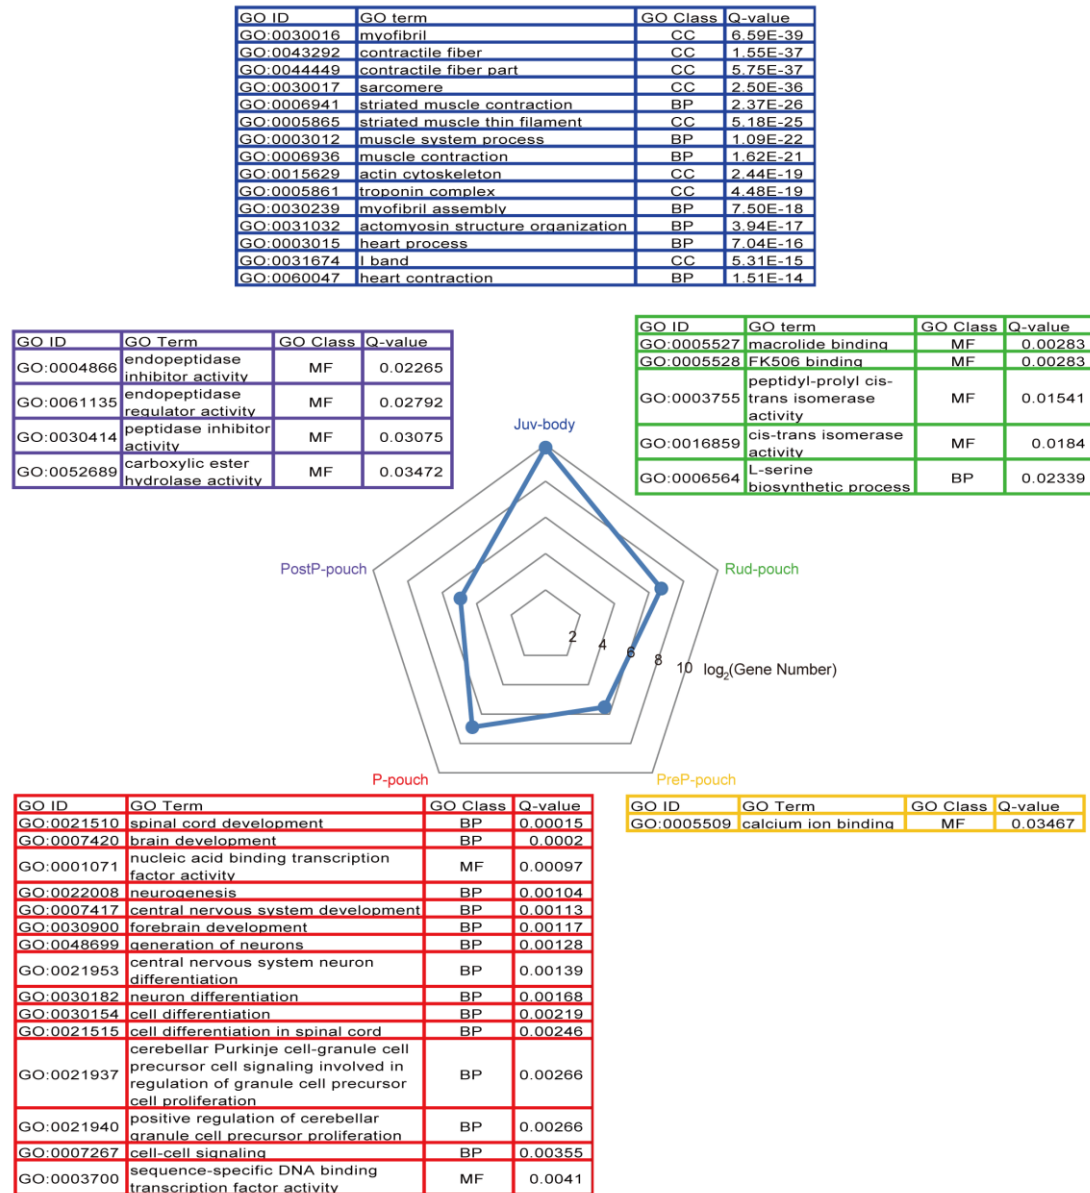

**Supplementary Figure 3.1** The tissue-specific expression genes in the brood pouch of five stages. The radar chart shows the specific expression gene number in the brood pouch of five stages. The tables show gene ontology enrichment of genes in the brood pouch of five stages (Q-value < 0.05).

### 3.3.2 Differential expression of genes during pregnancy stage in seahorse (*Hippocampus erectus*)

The differential expression genes between pregnancy group (brain, gonad and brood pouch of PrP) and non-pregnancy group (brain, gonad and brood pouch of DeP, MaP, and PPrP) were detected using Noiseq<sup>30</sup> with parameters “repl=bio, k = 0.5, norm = n, long = 1000, q = 0.8, pnr = 1, nss = 0, v = 0.02, lc = 1”. In total, 47 up-regulated (Supplementary Table 3.5) and 4 down-regulated genes were identified (Supplementary Table 3.6). The up-regulated genes during pregnancy were significantly enriched in the

pathways related to immune, cellular metabolic, and growth (Supplementary Table 3.7 and 3.8). For example, the up-regulated expression of antimicrobial genes (including C-lectin, Interleukin-1 beta, CD40, Annexin A1, Chitinase), may reflect the protection of fertilized eggs or developing embryos by paternal innate immune system. Interestingly, the up-regulated of immune-related genes was also observed in brood pouch of pipefish during pregnancy<sup>31</sup>.

The RNA-seq results were validated using quantitative Reverse Transcription PCR (qRT-PCR). In total, the expression profiles of 11 genes were examined at three developmental stages, with five biological replicates of each. qRT-PCR was performed using the Light Cycler@480 Sequence Detection System (Roche, Switzerland) with a 384-well plate. Each reaction involved a 3 min denaturation step at 94°C, then 40 cycles of 94°C for 15 s, 52°C for 15 s, 72°C for 30 s, and 85°C for 1 s to collect fluorescent signals, then a stepwise temperature increase from 52 °C to 99 °C to establish the melting curve. Standard curves were constructed using a series of 10-fold dilutions of quantified pMD@18-T Simple vector (TaKaRa, China) for each of the target genes. For all target genes, 18S rRNA was used as a reference gene.

All the data were expressed as mean  $\pm$  standard error of mean (S.E.M) and evaluated by one-way analysis of variance (ANOVA) followed by the Tukey's honestly significant difference test for adjusting P-values from multiple comparisons. Results were considered to be statistically significant for P-values  $< 0.05$ . All statistical analyses were carried out using SPSS for Windows, Version 20 (SPSS, Chicago, IL, USA).

Using qRT-PCR, the expression patterns of *Hem*, *Bhs*, *Mylfp*, *Ptr*, *Cc3*, *Cfv II*, *MI*, *HoxA11b*, and *MYL2* were investigated during seahorse pregnancy. During early pregnancy, expression of *MI* in the brood pouch was significantly higher ( $P < 0.05$ ) than in non-pregnant brood pouch. Additionally, the expression of the expression of *Bhs*, *Cc3*, *Cfv II*, *Hem*, *HoxA11b*, *MI*, *MYL2*, *Mylfp*, and *Ptr* in the brood pouch was significant higher in late pregnancy ( $P < 0.05$ ), than in the non-pregnant brood pouch (Supplementary Figure 3.2). Furthermore, the expression of *HoxA11b*, *Mylfp* and *Ptr* in the brood pouch was significant higher ( $P < 0.05$ ) in late pregnancy than in early pregnancy.

Expression of *Ncp* in the brood pouch was during pregnancy than in the non-pregnant group, however the difference was not statistically significant (Supplementary Figure 3.2). However, *Cos* showed a significant reduction in brood pouch expression during late pregnancy group in comparison to the non-pregnant group (Supplementary Figure 3.2).

**Supplementary Table 3.5** The up-regulated genes in seahorse (*Hippocampus erectus*) brood pouch during the pregnant stage. These *Hippocampus erectus* transcripts were analyzed with TopHat using *H. comes* gene models as reference. Hence they are identified with *H. comes* gene IDs.

| GeneID          | log2Ratio(pregnancy/<br>non_pregnancy) | Qvalue   | Function                                                                       |
|-----------------|----------------------------------------|----------|--------------------------------------------------------------------------------|
| H.comes.g023240 | 4.368582                               | 0.838697 | AMBP_PLEPL Protein AMBP (Fragment)                                             |
| H.comes.g003427 | 3.816643                               | 0.803939 | TNNT3_COTJA Troponin T, fast skeletal muscle isoforms                          |
| H.comes.g014099 | 5.907862                               | 0.864027 | BHMT1_DANRE Betaine--homocysteine S-methyltransferase 1                        |
| H.comes.g021640 | 7.810274                               | 0.873547 | CRGM1_CYPKA Gamma-crystallin M1                                                |
| H.comes.g021136 | 4.256193                               | 0.823031 | TNNC2_ANGAN Troponin C, skeletal muscle                                        |
| H.comes.g007877 | 6.306196                               | 0.844908 | REG1A_HUMAN Lithostathine-1-alpha                                              |
| H.comes.g007819 | 6.528582                               | 0.883529 | FA7_HUMAN Coagulation factor VII                                               |
| H.comes.g023554 | 6.115641                               | 0.930673 | FA10A_DANRE Fatty acid-binding protein 10-A, liver basic                       |
| H.comes.g010585 | 5.040597                               | 0.808372 | ITIH3_MOUSE Inter-alpha-trypsin inhibitor heavy chain H3                       |
| H.comes.g022811 | 7.080438                               | 0.9558   | CHIA_BOVIN Acidic mammalian chitinase                                          |
| H.comes.g022513 | 5.028519                               | 0.81464  | SMU1_MOUSE WD40 repeat-containing protein SMU1                                 |
| H.comes.g005088 | 4.920651                               | 0.813709 | TNNI2_COTJA Troponin I, fast skeletal muscle                                   |
| H.comes.g013016 | 4.896643                               | 0.876137 | HEMO_DANRE Hemopexin                                                           |
| H.comes.g023760 | 5.693401                               | 0.850023 | KNG_ANAMI Kininogen (Fragments)                                                |
| H.comes.g023153 | 6.383864                               | 0.921515 | KCRM_HUMAN Creatine kinase M-type                                              |
| H.comes.g000631 | 3.872616                               | 0.816248 | TIMP2_CANFA Metalloproteinase inhibitor 2                                      |
| H.comes.g010468 | 7.100171                               | 0.840802 | MLRV_HUMAN Myosin regulatory light chain 2, ventricular/cardiac muscle isoform |
| H.comes.g016985 | 5.182793                               | 0.826913 | MLE1_LIZRA Myosin light chain 1, skeletal muscle isoform                       |
| H.comes.g002056 | 4.878129                               | 0.853154 | LECT2_HUMAN Leukocyte cell-derived chemotaxin-2                                |
| H.comes.g013953 | 11.85753                               | 0.984533 | LCE_ORYLA Low choriolytic enzyme                                               |
| H.comes.g007746 | 4.952341                               | 0.850324 | MLE3_LIZRA Myosin light chain 3, skeletal muscle isoform                       |
| H.comes.g021643 | 8.415903                               | 0.892204 | CRGM3_CYPKA Gamma-crystallin M3                                                |
| H.comes.g016747 | 5.180167                               | 0.813487 | THRB_PIG Prothrombin                                                           |
| H.comes.g010571 | 6.851111                               | 0.882732 | MYSS_CYPKA Myosin heavy chain, fast skeletal muscle                            |
| H.comes.g017603 | 4.043459                               | 0.843358 | A1AT_CYPKA Alpha-1-antitrypsin homolog                                         |

|                   |          |          |                                                                            |
|-------------------|----------|----------|----------------------------------------------------------------------------|
| H.comes.g005089   | 4.23044  | 0.827285 | TNNI2_HUMAN Troponin I, fast skeletal muscle                               |
| H.comes.g020083   | 6.97581  | 0.833973 | SAMP_BOVIN Serum amyloid P-component                                       |
| H.comes.g002569   | 6.745131 | 0.903541 | DESM_CHICK Desmin                                                          |
| H.comes.g000632   | 4.355475 | 0.857355 | TIMP2_CANFA Metalloproteinase inhibitor 2                                  |
| H.comes.g003855   | 4.655239 | 0.811468 | ACTC_XENTR Actin, alpha cardiac muscle 1                                   |
| H.comes.g021138   | 8.295031 | 0.895578 | TNNC2_ANGAN Troponin C, skeletal muscle                                    |
| H.comes.g002336   | 6.087464 | 0.930828 | C1QT4_MOUSE Complement C1q tumor necrosis factor-related protein 4         |
| H.comes.g024215   | 4.187573 | 0.845676 | BHMT1_DANRE Betaine--homocysteine S-methyltransferase 1                    |
| H.comes.g010346   | 5.51736  | 0.87221  | ITIH3_RABIT Inter-alpha-trypsin inhibitor heavy chain H3                   |
| H.comes.g013572   | 4.964468 | 0.843544 | CO3_ONCMY Complement C3 (Fragment)                                         |
| H.comes.g012628   | 5.224806 | 0.854835 | MLRS_RABIT Myosin regulatory light chain 2, skeletal muscle isoform type 2 |
| H.comes.g003134   | 5.191591 | 0.890033 | A1AT_CHLAE Alpha-1-antitrypsin (Fragment)                                  |
| H.comes.g012260   | 4.446585 | 0.843527 | APOA1_COTJA Apolipoprotein A-I                                             |
| H.comes.g008021   | 4.137217 | 0.828796 | CO2A1_XENTR Collagen alpha-1(II) chain                                     |
| H.comes.g015637   | 4.115428 | 0.822803 | FIBB_CHICK Fibrinogen beta chain (Fragment)                                |
| H.comes.g012355   | 5.857476 | 0.914453 | FETUA_MOUSE Alpha-2-HS-glycoprotein                                        |
| H.comes.g016791   | 4.573971 | 0.847785 | HEMO_DANRE Hemopexin                                                       |
| H.comes.g003135   | 5.813314 | 0.854188 | -                                                                          |
| H.comes.g010004   | 5.614165 | 0.897283 | -                                                                          |
| H.comes.g020085   | 7.09891  | 0.951624 | SAMP_PIG Serum amyloid P-component                                         |
| H.comes.g024552   | 5.704551 | 0.903385 | ACTS_OREMO Actin, alpha skeletal muscle                                    |
| NP_001018321.1-D7 | 6.591019 | 0.8299   | MYSS_CYPKA Myosin heavy chain, fast skeletal muscle                        |

**Supplementary Table 3.6** Down-regulated genes in brood pouch during the pregnant stage. These *Hippocampus erectus* transcripts were analyzed with TopHat using *H. comes* gene models as reference. Hence they are identified with *H. comes* gene IDs.

| GeneID                        | log2Ratio(pregnancy/<br>non_pregnancy) | Qvalue   | Function                                  |
|-------------------------------|----------------------------------------|----------|-------------------------------------------|
| H.comes.g004099               | -5.7008                                | 0.829017 | -                                         |
| H.comes.g011789               | -11.1113                               | 0.987819 | COX2_GADMO Cytochrome c oxidase subunit 2 |
| H.comes.g016959               | -6.92983                               | 0.908501 | -                                         |
| gi_34013700_gb_AAQ56013.1_-D8 | -3.98756                               | 0.823406 | NCAN_PANTR Neurocan core protein          |

**Supplementary Table 3.7** GO enrichment of genes that were differentially expressed during pregnancy period in seahorse.

| GO ID      | GO Term                              | GO | Gene Number | Pvalue   |
|------------|--------------------------------------|----|-------------|----------|
| GO:0005865 | striated muscle thin filament        | CC | 5           | 1.21E-08 |
| GO:0030017 | sarcomere                            | CC | 7           | 4.14E-08 |
| GO:0044449 | contractile fiber part               | CC | 7           | 8.76E-08 |
| GO:0030016 | myofibril                            | CC | 7           | 1.29E-07 |
| GO:0043292 | contractile fiber                    | CC | 7           | 1.78E-07 |
| GO:0005861 | troponin complex                     | CC | 4           | 7.15E-07 |
| GO:0015629 | actin cytoskeleton                   | CC | 7           | 8.98E-06 |
| GO:0006941 | striated muscle contraction          | BP | 5           | 1.14E-05 |
| GO:0030239 | myofibril assembly                   | BP | 5           | 9.63E-05 |
| GO:0031032 | actomyosin structure organization    | BP | 5           | 0.00017  |
| GO:0047150 | betaine-homocysteine                 | MF | 2           | 0.00027  |
| GO:0030049 | muscle filament sliding              | BP | 3           | 0.00073  |
| GO:0033275 | actin-myosin filament sliding        | BP | 3           | 0.00073  |
| GO:0008898 | homocysteine S-methyltransferase     | MF | 2           | 0.00083  |
| GO:0006936 | muscle contraction                   | BP | 5           | 0.00113  |
| GO:0005856 | cytoskeleton                         | CC | 9           | 0.00129  |
| GO:0044430 | cytoskeletal part                    | CC | 8           | 0.00136  |
| GO:0003009 | skeletal muscle contraction          | BP | 3           | 0.00156  |
| GO:0070252 | actin-mediated cell contraction      | BP | 3           | 0.00183  |
| GO:0003012 | muscle system process                | BP | 5           | 0.00234  |
| GO:0006579 | amino-acid betaine catabolic process | BP | 2           | 0.00246  |
| GO:0008172 | S-methyltransferase activity         | MF | 2           | 0.00277  |
| GO:0050881 | musculoskeletal movement             | BP | 3           | 0.00367  |
| GO:0050879 | multicellular organismal movement    | BP | 3           | 0.00414  |
| GO:0055002 | striated muscle cell development     | BP | 5           | 0.00478  |
| GO:0010927 | cellular component assembly involved | BP | 5           | 0.0074   |
| GO:0055001 | muscle cell development              | BP | 5           | 0.00977  |
| GO:0030048 | actin filament-based movement        | BP | 3           | 0.01122  |
| GO:0030414 | peptidase inhibitor activity         | MF | 3           | 0.02198  |
| GO:0005576 | extracellular region                 | CC | 6           | 0.02628  |
| GO:0036302 | atrioventricular canal development   | BP | 2           | 0.02936  |
| GO:0051146 | striated muscle cell differentiation | BP | 5           | 0.0316   |
| GO:0060047 | heart contraction                    | BP | 3           | 0.03396  |
| GO:0003015 | heart process                        | BP | 3           | 0.04465  |
| GO:0061134 | peptidase regulator activity         | MF | 3           | 0.04591  |

**Supplementary Table 3.8** KEGG pathway enrichment of differentially expressed genes during pregnancy.

| Pathway ID | Pathway                             | Gene Number | Qvalue   |
|------------|-------------------------------------|-------------|----------|
| ko04610    | Complement and coagulation cascades | 9           | 7.95E-09 |
| ko05410    | Hypertrophic cardiomyopathy (HCM)   | 8           | 1.74E-06 |
| ko04260    | Cardiac muscle contraction          | 7           | 1.74E-06 |
| ko05414    | Dilated cardiomyopathy              | 8           | 2.06E-06 |

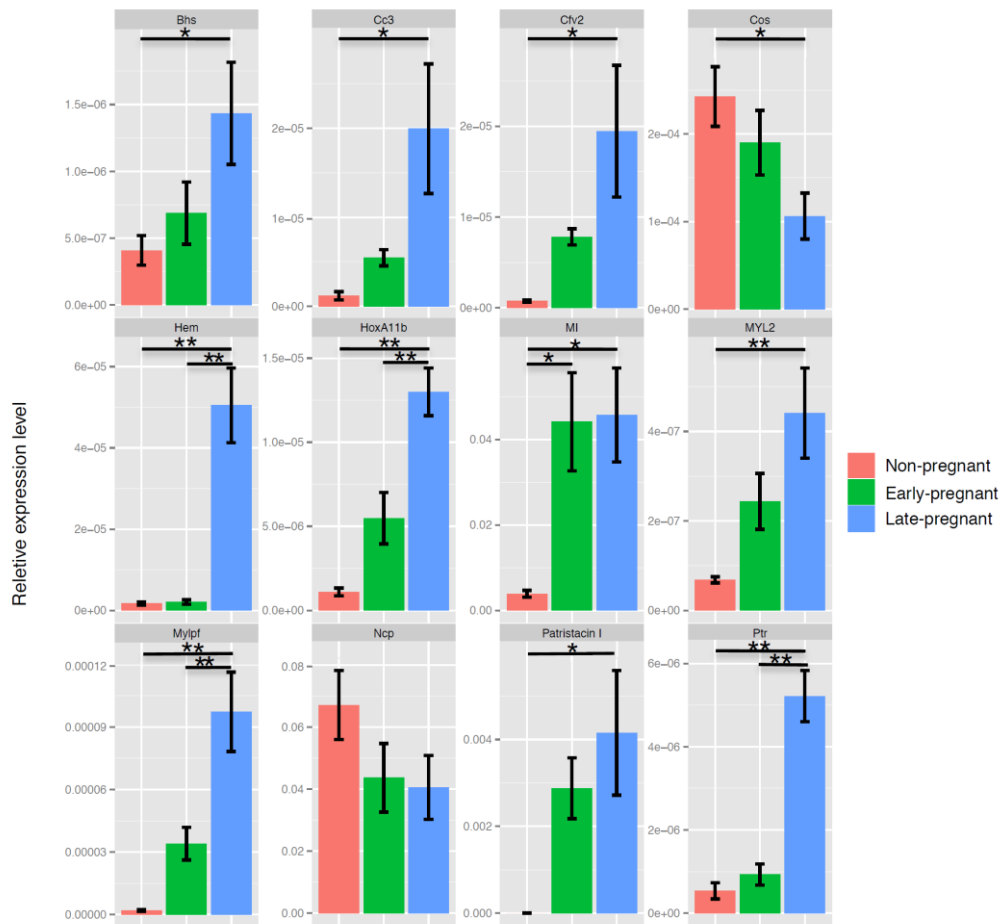

**Supplementary Figure 3.2** The differential expression genes in the brood pouch of seahorse during the pregnant stage. Data was presented as mean±S.E.M. (n = 5).

## 4. Gene family evolution

### 4.1. Gene family analysis

The gene family analysis was conducted by Treefam using the following steps.

- 1) Protein sequences of eight ray-fin fishes (zebrafish, *Danio rerio*; stickleback, *Gasterosteus aculeatus*; seahorse, *Hippocampus comes*, Nile tilapia, *Oreochromis niloticus*; medaka, *Oryzias latipes*; fugu, *Takifugu rubripes*, platyfish, *Xiphophorus maculatus* and spotted gar, *Lepisosteus oculatus*) were downloaded from the Ensembl database (Release 75)<sup>32</sup> and the blue-spotted mudskipper *Boleophthalmus pectinirostris* was acquired from the authors<sup>21</sup>. BLASTP<sup>33</sup> was employed to identify potential homologous genes using E-value < 1e-10.
- 2) The raw Blast results were refined using solar (an in-house software, version 0.9.6) by which the high-scoring segment pairs (HSPs) were conjoined.
- 3) Similarity between protein sequences were evaluated using bit-score, followed by clustering protein sequences into gene families using hcluster\_sg, a hierarchical clustering algorithm in the Treefam pipeline (version 0.50) with the parameters “-w 5 -s 0.33 -m 100000”.

The gene family cluster result of ten species is shown in [Supplementary Figure 4.1](#).

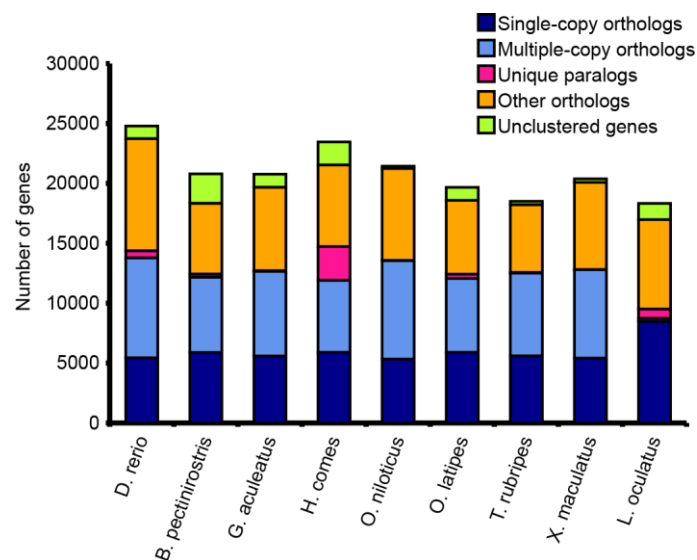

**Supplementary Figure 4.1** Gene family evolution in eleven species.

Single-copy orthologs: species contains one copy of orthologous gene.

Multiple-copy orthologs: species contains multiple copies of orthologous gene.

Unique paralogs: lineage specific genes.

Other orthologs: orthologous genes that could only be found in some species but not in all nine species.



## 4.2 Phylogenetic tree construction and divergence time estimate

We obtained 4122 one-to-one orthologous genes from the gene family analysis using the pipeline described before. The protein sequences of one-to-one orthologous genes were aligned using MUSCLE with the default parameters<sup>34</sup>. We then filtered the saturated sites and poorly aligned regions using trimAl<sup>35</sup> with the parameters “-gt 0.8 -st 0.001 -cons 60”. After trimming the saturated sites and poorly aligned regions in the concatenated alignment, 2,128,000 amino acids were used in the phylogenomics reconstruction. The trimmed protein alignments were used as a guide to align corresponding coding sequences (CDS). The aligned protein and the four-fold degenerated sites in the CDS sequences were each concatenated into a super gene using an in-house Perl script.

The phylogenomics was reconstructed using RAxML version 8.1.19<sup>36</sup> based on the concatenated protein sequences. Specifically, we used PROTGAMMAAUTO parameter to select the optimal amino acid substitution model, specified the spotted gar as the outgroup, and evaluated the robustness of the result using 100 bootstraps. To compare the neutral mutation rate of different species, we also generated a phylogeny based on the four-fold degenerate sites. The phylogenomics topology was used as the input to optimize the branch lengths of alignment of four-fold degenerate sites using the “-f e” parameter in Raxml under the general time reversible (GTR) model, suggested by modelgenerator version 0.85<sup>37</sup>. We calculated the pairwise distances to the outgroup (spotted gar) based on the optimized branch length of neutral tree using the ‘cophenetic.phylo’ module in the R-package ‘ape’<sup>38</sup>.

## 4.3 Expansion and contraction of gene families

We used CAFE (version 2.1), a program analyzing gene family expansion and contraction under maximum likelihood framework, in the gene family evolution analysis. The gene family results from Treefam pipeline and the estimated divergence time between species were used as inputs. We used to the parameters “-p 0.01, -r 10000, -s” to search the birth and death parameter ( $\lambda$ ) of genes, calculated the probability of each gene family with observed sizes using Monte Carlo 10000 random samplings, and reported birth and death parameters in gene families with probability less than 0.01. For the gene family expansion and contraction analysis in seahorse, we first filtered out the gene families without homology in the SWISS-PROT database<sup>23</sup> to reduce the potential false positive expansions or contractions caused by gene prediction. Besides, the families that contain sequences that have multiple functional annotations were also removed. Finally, we found 25 and 54 lineage-specific expansion and contraction of gene families respectively in seahorse (Supplementary Table 4.1 and 4.2)



#### 4.4 Rate of molecular evolution

##### a) Tajima's relative rate test

The concatenated protein sequences were used in the Tajima's relative rate test (RRT)<sup>39</sup>. RRT is based on three sequences; one outgroup and two ingroups. A significantly higher number of lineage-specific substitutions (based on the Chi-square test) indicate a faster evolution rate of an ingroup in comparison to the other ingroup (Supplementary Table 4.3) and vice versa<sup>39</sup>. In the RRT, we specified spotted gar as the outgroup, and tested the relative evolution rate between seahorse and other fish species.

##### b) Two cluster analysis

Two cluster analysis, which can be considered as an extension of Tajima's RRT, tests molecular evolution of multiple sequences in a phylogenetic context<sup>40</sup>. A faster or slower rate of evolution of particular taxa was examined using Z-statistics. tpcv module in the LINTRE program<sup>41</sup> was used in the two cluster analysis. Since the direct comparison between seahorse and other species using the complete dataset is not possible, we first converted the concatenated protein alignment to the format that was required by LINTRE and extracted the alignment of the spotted gar, seahorse, and the taxa of interest. In total, seven alignments (Supplementary Table 4.4) and the corresponding tree files were prepared for further analyses.

The branch length of seahorse is longer than that of other fishes in the phylogeny based on the alignment of neutral sites in coding region, which suggests a faster non-synonymous substitution rate in the seahorse lineage in comparison to other fish lineages (Supplementary Fig. 4.3). We used RRT and two cluster analysis to test whether this observation is statistically significant or not. Both methods suggest that seahorse evolves significantly faster than any other species in the analysis (Supplementary Table 4.3 and 4.4).

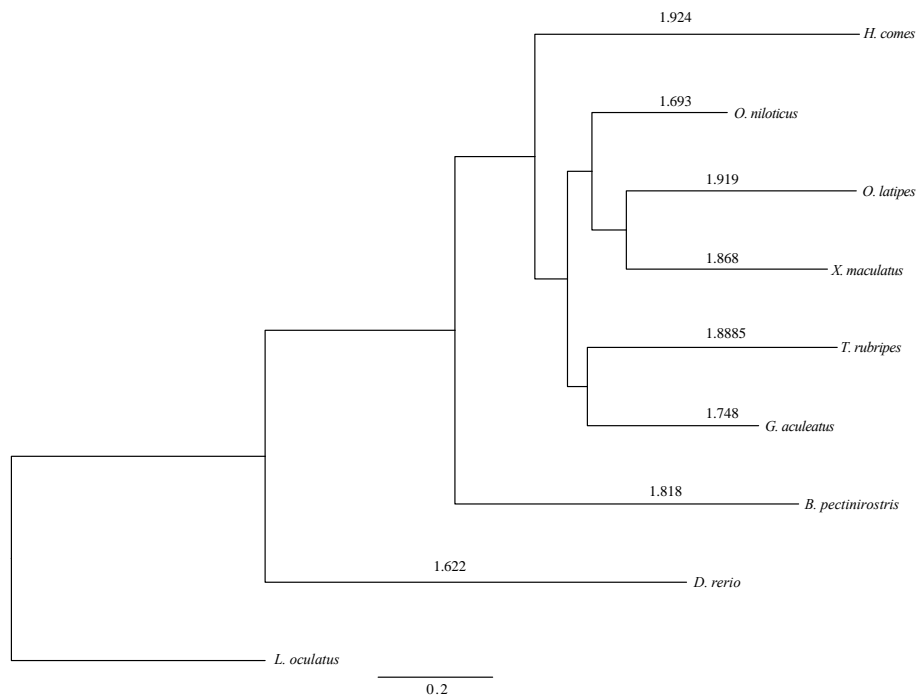

**Supplementary Figure 4.3** The phylogeny of seahorse (*H. comes*) and other teleost fishes. The phylogeny was reconstructed using the alignment of four-fold degenerate sites. The value on the branches the branch length of each species, which was calculated using the gar as the outgroup.

**Supplementary Table 4.1** Expanded gene families in seahorse.

| Fam_id | DANRE | BOLPE | GASAC | HIPCO | ORENI | ORYLA | TAKRU | XIPMA | LEPOC | Gene_Name   | Description                                                        |
|--------|-------|-------|-------|-------|-------|-------|-------|-------|-------|-------------|--------------------------------------------------------------------|
| 1196   | 7     | 1     | 0     | 4     | 0     | 1     | 0     | 0     | 0     | Zc3h4       | Zinc finger CCCH domain-containing protein 4                       |
| 1309   | 0     | 1     | 0     | 3     | 0     | 0     | 1     | 0     | 1     | chrna3      | Neuronal acetylcholine receptor subunit alpha-3                    |
| 2249   | 0     | 29    | 0     | 116   | 2     | 0     | 0     | 5     | 0     | ZNF         | Zinc finger protein                                                |
| 2508   | 0     | 0     | 0     | 6     | 0     | 0     | 4     | 0     | 1     | Slc6a13     | Sodium- and chloride-dependent GABA transporter 2                  |
| 2619   | 1     | 0     | 8     | 8     | 3     | 0     | 0     | 3     | 1     | PGBD4       | PiggyBac transposable element-derived protein 4                    |
| 2696   | 2     | 1     | 0     | 4     | 1     | 0     | 1     | 3     | 1     | THAP        | THAP domain-containing protein                                     |
| 2771   | 12    | 0     | 0     | 9     | 1     | 8     | 13    | 0     | 2     | Vpreb1      | Immunoglobulin iota chain                                          |
| 4207   | 0     | 1     | 0     | 4     | 0     | 0     | 0     | 0     | 1     | CFDP2       | Craniofacial development protein 2                                 |
| 4209   | 0     | 0     | 0     | 3     | 0     | 10    | 0     | 0     | 1     | CFDP2       | Craniofacial development protein 2                                 |
| 4332   | 0     | 0     | 1     | 6     | 4     | 2     | 1     | 0     | 1     | ZBED1/ZBED4 | Zinc finger BED domain-containing protein 1/4                      |
| 4333   | 0     | 0     | 0     | 7     | 0     | 10    | 0     | 0     | 0     | ZBED1/ZBED4 | Zinc finger BED domain-containing protein 1/4                      |
| 5698   | 0     | 4     | 0     | 6     | 0     | 0     | 1     | 1     | 0     | TCF7        | Transcription factor 7                                             |
| 8442   | 0     | 1     | 0     | 3     | 0     | 3     | 1     | 0     | 1     | PPP1R3A     | Protein phosphatase 1 regulatory subunit                           |
| 8958   | 0     | 0     | 0     | 6     | 0     | 0     | 0     | 0     | 1     | CHIA        | Acidic mammalian chitinase                                         |
| 10367  | 8     | 0     | 1     | 5     | 1     | 2     | 3     | 2     | 1     | HARBI1      | Putative nuclease HARBI1                                           |
| 10691  | 3     | 0     | 0     | 12    | 0     | 0     | 1     | 0     | 0     | Tf2-6       | Transposon Tf2-6 polyprotein                                       |
| 10859  | 1     | 1     | 3     | 5     | 7     | 2     | 1     | 2     | 0     | Natterin-4  | Natterin-4                                                         |
| 11719  | 8     | 1     | 16    | 26    | 37    | 12    | 3     | 1     | 0     | GTF2IRD2    | General transcription factor II-I repeat domain-containing protein |
| 11722  | 0     | 0     | 0     | 5     | 0     | 4     | 0     | 0     | 0     | SCAND3      | SCAN domain-containing protein                                     |
| 12070  | 1     | 0     | 0     | 4     | 0     | 0     | 0     | 0     | 0     | ZMYM1       | Zinc finger MYM-type protein 1                                     |
| 12763  | 3     | 0     | 3     | 6     | 9     | 1     | 0     | 3     | 0     | POGK        | Pogo transposable element with KRAB domain                         |

|       |   |   |   |   |   |   |   |   |   |            |                                     |
|-------|---|---|---|---|---|---|---|---|---|------------|-------------------------------------|
| 13209 | 2 | 0 | 2 | 3 | 0 | 2 | 0 | 0 | 1 | ubq-1      | Polyubiquitin-A                     |
| 15744 | 0 | 1 | 1 | 4 | 2 | 1 | 0 | 0 | 0 | Zg16       | Zymogen granule membrane protein 16 |
| 17361 | 0 | 0 | 0 | 3 | 0 | 0 | 0 | 0 | 0 | F5         | Coagulation factor V                |
| 17579 | 0 | 0 | 0 | 3 | 0 | 1 | 0 | 1 | 0 | mt:ATPase6 | ATP synthase subunit a              |

**Supplementary Table 4.2** Contracted gene families in seahorse.

| Fam_id | DANRE | BOLPE | GASAC | HIPCO | ORENI | ORYLA | TAKRU | XIPMA | LEPOC | Gene_Name | Description                                          |
|--------|-------|-------|-------|-------|-------|-------|-------|-------|-------|-----------|------------------------------------------------------|
| 235    | 6     | 9     | 13    | 4     | 15    | 8     | 10    | 8     | 1     |           | Trypsin                                              |
| 237    | 15    | 2     | 7     | 3     | 24    | 19    | 9     | 7     | 6     | Prss8     | Prostasin                                            |
| 741    | 19    | 0     | 4     | 1     | 18    | 1     | 5     | 5     | 1     | CLEC4M    | C-type lectin domain family 4 member M               |
| 743    | 9     | 18    | 6     | 0     | 18    | 17    | 0     | 5     | 2     | MRC       | Macrophage mannose receptor                          |
| 746    | 76    | 14    | 6     | 1     | 28    | 10    | 0     | 8     | 1     | MRC       | Macrophage mannose receptor                          |
| 771    | 11    | 13    | 7     | 2     | 29    | 7     | 4     | 22    | 1     | C1qtnf    | Complement C1q tumor necrosis factor-related protein |
| 960    | 5     | 3     | 1     | 0     | 4     | 2     | 4     | 4     | 3     | FFAR3     | Free fatty acid receptor 3                           |
| 1053   | 50    | 6     | 26    | 2     | 20    | 16    | 7     | 0     | 10    | Taar      | Trace amine-associated receptor                      |
| 1118   | 6     | 2     | 4     | 0     | 4     | 6     | 5     | 2     | 2     | TAAR1     | Trace amine-associated receptor 1                    |
| 1164   | 19    | 3     | 4     | 0     | 7     | 7     | 9     | 6     | 1     | OR        | Olfactory receptor                                   |
| 1171   | 2     | 8     | 13    | 1     | 11    | 4     | 4     | 6     | 7     | OR11A1    | Olfactory receptor 11A1                              |
| 1174   | 20    | 1     | 12    | 1     | 6     | 6     | 1     | 4     | 9     | OR1F1     | Olfactory receptor 1F1                               |
| 1186   | 15    | 4     | 2     | 1     | 3     | 8     | 5     | 3     | 3     | OR1F12    | Olfactory receptor 1F12                              |
| 1298   | 6     | 5     | 5     | 0     | 5     | 2     | 1     | 5     | 1     | HTR3A     | 5-hydroxytryptamine receptor 3A                      |
| 1312   | 7     | 4     | 5     | 1     | 6     | 5     | 2     | 5     | 1     | Chrn2     | Neuronal acetylcholine receptor subunit beta-2       |

|      |     |    |    |    |     |    |    |    |    |         |                                                   |
|------|-----|----|----|----|-----|----|----|----|----|---------|---------------------------------------------------|
| 2116 | 0   | 4  | 3  | 0  | 31  | 0  | 0  | 3  | 17 | BTNL2   | Butyrophilin-like protein 2                       |
| 2125 | 0   | 22 | 83 | 0  | 36  | 5  | 0  | 1  | 0  |         | Stonustoxin subunit                               |
| 2127 | 287 | 34 | 2  | 1  | 130 | 6  | 7  | 14 | 1  | NLRC3   | Protein NLRC3                                     |
| 2130 | 22  | 13 | 0  | 0  | 37  | 6  | 12 | 3  | 13 | NLRC3   | Protein NLRC3                                     |
| 2132 | 6   | 7  | 0  | 0  | 11  | 20 | 22 | 6  | 0  | RNH1    | Ribonuclease inhibitor                            |
| 2139 | 34  | 15 | 4  | 0  | 54  | 36 | 4  | 6  | 4  | Trim16  | Tripartite motif-containing protein 16            |
| 2145 | 23  | 37 | 53 | 3  | 39  | 7  | 7  | 16 | 6  | TRIM    | E3 ubiquitin-protein ligase                       |
| 2152 | 38  | 24 | 28 | 10 | 53  | 12 | 7  | 15 | 6  | TRIM    | E3 ubiquitin-protein ligase                       |
| 2270 | 178 | 25 | 29 | 25 | 126 | 36 | 16 | 35 | 1  | ZNF     |                                                   |
| 2617 | 1   | 0  | 0  | 0  | 9   | 3  | 6  | 6  | 8  | PGBD3   | PiggyBac transposable element-derived protein 3   |
| 2759 | 43  | 13 | 18 | 4  | 65  | 29 | 26 | 24 | 10 |         | Ig kappa chain V-I region Walker                  |
| 2765 | 1   | 2  | 9  | 0  | 39  | 11 | 32 | 0  | 14 | Ighv3-6 | Ig heavy chain V region 3-6                       |
| 2772 | 17  | 6  | 6  | 0  | 18  | 16 | 5  | 1  | 62 |         | Ig kappa chain V-*                                |
| 2773 | 3   | 3  | 20 | 1  | 13  | 11 | 17 | 0  | 9  |         | Ig kappa chain V-IV region B17                    |
| 2776 | 3   | 5  | 12 | 1  | 8   | 0  | 4  | 1  | 2  | V-TCR   | Viral T-cell receptor beta chain-like T17T-22     |
| 3590 | 0   | 8  | 1  | 1  | 7   | 12 | 16 | 4  | 2  | Pim1    | Serine/threonine-protein kinase pim-1             |
| 4168 | 3   | 3  | 2  | 0  | 5   | 2  | 3  | 3  | 1  | Capn1   | Calpain-1 catalytic subunit                       |
| 4563 | 2   | 4  | 5  | 1  | 8   | 4  | 4  | 2  | 1  | cldnd   | Claudin-like protein ZF-A89                       |
| 5089 | 15  | 7  | 4  | 1  | 5   | 3  | 2  | 5  | 1  | Ugt2a2  | UDP-glucuronosyltransferase 2A2                   |
| 5332 | 34  | 0  | 0  | 1  | 5   | 3  | 7  | 7  | 1  | PCDHA8  | Protocadherin alpha-8                             |
| 5356 | 4   | 0  | 1  | 0  | 7   | 3  | 4  | 4  | 2  | CDH1    | Cadherin-1                                        |
| 5472 | 15  | 10 | 8  | 0  | 16  | 3  | 9  | 13 | 4  | IFI44   | Interferon-induced protein 44                     |
| 5903 | 13  | 4  | 0  | 0  | 9   | 5  | 5  | 4  | 1  | MFAP4   | Microfibril-associated glycoprotein 4             |
| 6005 | 3   | 5  | 4  | 0  | 3   | 5  | 4  | 4  | 1  | DUSP13  | Dual specificity protein phosphatase 13 isoform B |
| 6578 | 30  | 4  | 3  | 0  | 28  | 6  | 2  | 6  | 1  | Samd3   | Sterile alpha motif domain-containing protein 3   |

|       |    |    |    |   |    |    |    |    |   |            |                                                             |
|-------|----|----|----|---|----|----|----|----|---|------------|-------------------------------------------------------------|
| 6689  | 34 | 10 | 20 | 3 | 11 | 10 | 23 | 4  | 1 | zgc:112234 | Histone H2B 1/2                                             |
| 6690  | 30 | 17 | 23 | 8 | 10 | 9  | 22 | 3  | 1 |            | Histone H2A                                                 |
| 6853  | 21 | 4  | 10 | 3 | 28 | 7  | 4  | 16 | 2 | GIMAP      | GTPase IMAP family member                                   |
| 6857  | 10 | 8  | 1  | 0 | 11 | 3  | 1  | 2  | 2 | GIMAP      | GTPase IMAP family member                                   |
| 6858  | 6  | 7  | 9  | 0 | 6  | 3  | 0  | 5  | 1 | GIMAP      | GTPase IMAP family member                                   |
| 7097  | 12 | 1  | 6  | 1 | 11 | 6  | 5  | 7  | 3 | Cyp2d1     | Cytochrome P450 2D1                                         |
| 8283  | 3  | 3  | 8  | 0 | 3  | 2  | 3  | 3  | 1 | Psmb7      | Proteasome subunit beta type-7                              |
| 8284  | 7  | 7  | 23 | 3 | 6  | 6  | 8  | 7  | 1 | PSMB       | Proteasome subunit beta type                                |
| 10329 | 7  | 4  | 0  | 0 | 7  | 0  | 6  | 0  | 1 | IRGC       | Interferon-inducible GTPase 5                               |
| 10526 | 36 | 2  | 22 | 5 | 13 | 17 | 11 | 1  | 8 |            | Gamma-crystallin M3                                         |
| 10795 | 8  | 2  | 6  | 1 | 5  | 4  | 1  | 5  | 2 | hbb2       | Hemoglobin subunit beta-2                                   |
| 10892 | 14 | 10 | 3  | 1 | 4  | 7  | 2  | 12 | 5 | Art1       | GPI-linked NAD(P)(+)-arginine ADP-ribosyltransferase 1      |
| 11005 | 16 | 16 | 21 | 4 | 0  | 10 | 14 | 4  | 2 |            | Histone H3                                                  |
| 13592 | 6  | 1  | 7  | 1 | 7  | 6  | 1  | 4  | 1 | IFIT1      | Interferon-induced protein with tetratricopeptide repeats 1 |

**Supplementary Table 4.3.** Relative rate test of seahorse and other teleost fishes. The chi-square test was based on 1 degree of freedom.

| Outgroup | Ingroup 1 | Ingroup2    | Identical | Ingroup 1 specific | Ingroup2 species | Chi-score   | P-value  | Faster   |
|----------|-----------|-------------|-----------|--------------------|------------------|-------------|----------|----------|
| gar      | seahorse  | stickleback | 1331337   | 113468             | 88885            | 2986.48347  | <0.00001 | seahorse |
| gar      | seahorse  | tilapia     | 1350761   | 118489             | 69461            | 12789.27791 | <0.00001 | seahorse |
| gar      | seahorse  | zebrafish   | 1291940   | 178187             | 128282           | 8126.46312  | <0.00001 | seahorse |
| gar      | seahorse  | platyfish   | 1328126   | 117363             | 92096            | 3047.95349  | <0.00001 | seahorse |
| gar      | seahorse  | medaka      | 1313994   | 116132             | 106228           | 441.12797   | <0.00001 | seahorse |
| gar      | seahorse  | mudskipper  | 1309593   | 116182             | 110629           | 135.95376   | <0.00001 | seahorse |
| gar      | seahorse  | fugu        | 1319540   | 113803             | 100682           | 802.66984   | <0.00001 | seahorse |

**Supplementary Table 4.4.** Two cluster analysis of seahorse and other teleost fishes. The branch length was calculated using gar as the outgroup. Z-statistic was used to test whether the distances between ingroups (bA, bB) to outgroup is significantly different to 0 or not. Delta is the absolute difference between bA and bB. Z-statistics (Z) is delta/standard error (s.e.). CP (confident probability) is equal to 1- P-value.

| Outgroup | Ingroup A | Ingroup B   | bA     | bB     | delta  | s.e.   | Z        | CP     | Faster   |
|----------|-----------|-------------|--------|--------|--------|--------|----------|--------|----------|
| gar      | seahorse  | stickleback | 0.1216 | 0.0973 | 0.0242 | 0.0004 | 54.5639  | 99.96% | seahorse |
| gar      | seahorse  | tilapia     | 0.1246 | 0.0771 | 0.0475 | 0.0004 | 112.3544 | 99.96% | seahorse |
| gar      | seahorse  | zebrafish   | 0.1952 | 0.1469 | 0.0483 | 0.0005 | 89.7733  | 99.96% | seahorse |
| gar      | seahorse  | platyfish   | 0.1273 | 0.1024 | 0.0249 | 0.0005 | 55.1208  | 99.96% | seahorse |
| gar      | seahorse  | medaka      | 0.1281 | 0.1182 | 0.0099 | 0.0005 | 20.9982  | 99.96% | seahorse |
| gar      | seahorse  | mudskipper  | 0.1297 | 0.1241 | 0.0056 | 0.0005 | 11.6591  | 99.96% | seahorse |
| gar      | seahorse  | fugu        | 0.1258 | 0.1127 | 0.0130 | 0.0005 | 28.3195  | 99.96% | seahorse |

## 5. Detection of positively selected genes

Using the methods described in [Supplementary Method 4.1](#), we first did gene family analysis of ten teleost genomes (zebrafish, *D. rerio*; cod, *G. morhua*; stickleback, *G. aculeatus*; seahorse, *H. comes*; Nile tilapia, *O. niloticus*; medaka, *O. latipes*; fugu, *T. rubripes*; Tetraodon, *T. nigroviridis*; Platyfish, *X. maculatus*; and coelacanth, *L. chalumnae*). In total, 3,721 one-to-one orthologous genes were used in the positive selection analysis. To increase the accuracy of alignment, we first aligned the protein sequences using MUSCLE<sup>34</sup> with default parameters. Then, the protein alignment was employed as a guide for aligning CDS. Positive selection analysis was conducted using the refined branch-site model<sup>42</sup> which is implemented in the codeml program of PAML package<sup>43</sup> (version 4). We compared ModelA1, in which sites may evolve neutrally and under purifying selection with ModelA that allows sites to be also under positive selection. P-values were computed using the X2 statistic adjusted by the false discovery rate (FDR) method to allow for multiple testing.

Using the pipeline that was described before, a total of 572 genes were under positive selection in seahorse (FDR adjusted P-value < 0.05) ([Supplementary Table 5.1](#)).



**Supplementary Table 5.1** GO enrichment test of positively selected genes in seahorse

| GO_ID      | GO_Term                                          | GO_Class | X1  | X2   | P-value |
|------------|--------------------------------------------------|----------|-----|------|---------|
| GO:0090304 | nucleic acid metabolic process                   | BP       | 77  | 1385 | 0.00013 |
| GO:0044260 | cellular macromolecule metabolic process         | BP       | 148 | 3385 | 0.00031 |
| GO:0016070 | RNA metabolic process                            | BP       | 55  | 956  | 0.00477 |
| GO:1901360 | organic cyclic compound metabolic process        | BP       | 104 | 2251 | 0.00498 |
| GO:0006725 | cellular aromatic compound metabolic process     | BP       | 99  | 2122 | 0.00622 |
| GO:0046483 | heterocycle metabolic process                    | BP       | 98  | 2105 | 0.00781 |
| GO:0044428 | nuclear part                                     | CC       | 89  | 1944 | 0.00803 |
| GO:0006139 | nucleobase-containing compound metabolic process | BP       | 93  | 1982 | 0.01086 |
| GO:0031981 | nuclear lumen                                    | CC       | 79  | 1687 | 0.01181 |
| GO:0034641 | cellular nitrogen compound metabolic process     | BP       | 102 | 2243 | 0.01327 |
| GO:0043170 | macromolecule metabolic process                  | BP       | 152 | 3741 | 0.02085 |
| GO:0005730 | nucleolus                                        | CC       | 45  | 822  | 0.02196 |
| GO:0070013 | intracellular organelle lumen                    | CC       | 86  | 1926 | 0.02817 |
| GO:0009059 | macromolecule biosynthetic process               | BP       | 58  | 1098 | 0.0336  |
| GO:0000930 | gamma-tubulin complex                            | CC       | 4   | 10   | 0.03403 |
| GO:0044237 | cellular metabolic process                       | BP       | 190 | 4966 | 0.03455 |
| GO:0043233 | organelle lumen                                  | CC       | 86  | 1938 | 0.03504 |
| GO:0031974 | membrane-enclosed lumen                          | CC       | 87  | 1973 | 0.03955 |
| GO:0071704 | organic substance metabolic process              | BP       | 196 | 5170 | 0.04019 |
| GO:0034645 | cellular macromolecule biosynthetic process      | BP       | 56  | 1056 | 0.04259 |

BP: Biological process. CC: Cellular Component.

X1: number of genes under positive selection within the GO term, X2: total number of genes within the GO term.

**Supplementary Table 5.2** KEGG enrichment test for positively selected genes in seahorse.

| Pathway ID | Pathway                                    | Gene Number | Qvalue    |
|------------|--------------------------------------------|-------------|-----------|
| ko03008    | Ribosome biogenesis in eukaryotes          | 12          | 0.1059851 |
| ko00740    | Riboflavin metabolism                      | 3           | 0.6429771 |
| ko00450    | Selenocompound metabolism                  | 3           | 0.6429771 |
| ko00970    | Aminoacyl-tRNA biosynthesis                | 6           | 0.6429771 |
| ko03420    | Nucleotide excision repair                 | 6           | 0.6429771 |
| ko03030    | DNA replication                            | 4           | 0.9981941 |
| ko00511    | Other glycan degradation                   | 3           | 0.9981941 |
| ko03440    | Homologous recombination                   | 4           | 0.9981941 |
| ko03430    | Mismatch repair                            | 3           | 0.9981941 |
| ko05131    | Shigellosis                                | 10          | 0.999996  |
| ko03013    | RNA transport                              | 23          | 0.999996  |
| ko03015    | mRNA surveillance pathway                  | 16          | 0.999996  |
| ko00600    | Sphingolipid metabolism                    | 5           | 0.999996  |
| ko00260    | Glycine, serine and threonine metabolism   | 4           | 0.999996  |
| ko00380    | Tryptophan metabolism                      | 4           | 0.999996  |
| ko03460    | Fanconi anemia pathway                     | 5           | 0.999996  |
| ko04512    | ECM-receptor interaction                   | 14          | 0.999996  |
| ko00860    | Porphyryn and chlorophyll metabolism       | 3           | 0.999996  |
| ko00650    | Butanoate metabolism                       | 3           | 0.999996  |
| ko05132    | Salmonella infection                       | 14          | 0.999996  |
| ko00040    | Pentose and glucuronate interconversions   | 4           | 0.999996  |
| ko00561    | Glycerolipid metabolism                    | 5           | 0.999996  |
| ko00670    | One carbon pool by folate                  | 2           | 0.999996  |
| ko04064    | NF-kappa B signaling pathway               | 9           | 0.999996  |
| ko04810    | Regulation of actin cytoskeleton           | 27          | 0.999996  |
| ko00750    | Vitamin B6 metabolism                      | 1           | 0.999996  |
| ko04146    | Peroxisome                                 | 6           | 0.999996  |
| ko04622    | RIG-I-like receptor signaling pathway      | 4           | 0.999996  |
| ko04975    | Fat digestion and absorption               | 4           | 0.999996  |
| ko05220    | Chronic myeloid leukemia                   | 7           | 0.999996  |
| ko00072    | Synthesis and degradation of ketone bodies | 1           | 0.999996  |
| ko05100    | Bacterial invasion of epithelial cells     | 9           | 0.999996  |

|         |                                                  |    |          |
|---------|--------------------------------------------------|----|----------|
| ko00340 | Histidine metabolism                             | 2  | 0.999996 |
| ko04142 | Lysosome                                         | 8  | 0.999996 |
| ko03040 | Spliceosome                                      | 13 | 0.999996 |
| ko00603 | Glycosphingolipid biosynthesis -<br>globo series | 1  | 0.999996 |
| ko00460 | Cyanoamino acid metabolism                       | 1  | 0.999996 |
| ko05110 | Vibrio cholerae infection                        | 16 | 0.999996 |
| ko05146 | Amoebiasis                                       | 23 | 0.999996 |
| ko05130 | Pathogenic Escherichia coli infection            | 10 | 0.999996 |
| ko04350 | TGF-beta signaling pathway                       | 7  | 0.999996 |
| ko00310 | Lysine degradation                               | 6  | 0.999996 |
| ko03018 | RNA degradation                                  | 5  | 0.999996 |
| ko00280 | Valine, leucine and isoleucine<br>degradation    | 3  | 0.999996 |
| ko00565 | Ether lipid metabolism                           | 3  | 0.999996 |
| ko04620 | Toll-like receptor signaling pathway             | 5  | 0.999996 |
| ko05169 | Epstein-Barr virus infection                     | 16 | 0.999996 |
| ko04610 | Complement and coagulation<br>cascades           | 6  | 0.999996 |
| ko03022 | Basal transcription factors                      | 3  | 0.999996 |
| ko04120 | Ubiquitin mediated proteolysis                   | 9  | 0.999996 |
| ko05134 | Legionellosis                                    | 6  | 0.999996 |
| ko04510 | Focal adhesion                                   | 22 | 0.999996 |
| ko04270 | Vascular smooth muscle contraction               | 16 | 0.999996 |
| ko05219 | Bladder cancer                                   | 3  | 0.999996 |
| ko04141 | Protein processing in endoplasmic<br>reticulum   | 11 | 0.999996 |
| ko05416 | Viral myocarditis                                | 10 | 0.999996 |
| ko04110 | Cell cycle                                       | 8  | 0.999996 |
| ko04722 | Neurotrophin signaling pathway                   | 9  | 0.999996 |
| ko04666 | Fc gamma R-mediated phagocytosis                 | 10 | 0.999996 |
| ko00520 | Amino sugar and nucleotide sugar<br>metabolism   | 4  | 0.999996 |
| ko03410 | Base excision repair                             | 2  | 0.999996 |
| ko04210 | Apoptosis                                        | 5  | 0.999996 |
| ko00900 | Terpenoid backbone biosynthesis                  | 1  | 0.999996 |
| ko00360 | Phenylalanine metabolism                         | 1  | 0.999996 |
| ko05144 | Malaria                                          | 3  | 0.999996 |
| ko00010 | Glycolysis / Gluconeogenesis                     | 3  | 0.999996 |
| ko04115 | p53 signaling pathway                            | 5  | 0.999996 |
| ko03060 | Protein export                                   | 1  | 0.999996 |
| ko04623 | Cytosolic DNA-sensing pathway                    | 2  | 0.999996 |

|         |                                             |    |          |
|---------|---------------------------------------------|----|----------|
| ko00620 | Pyruvate metabolism                         | 2  | 0.999996 |
| ko00071 | Fatty acid metabolism                       | 2  | 0.999996 |
| ko04974 | Protein digestion and absorption            | 8  | 0.999996 |
| ko00330 | Arginine and proline metabolism             | 3  | 0.999996 |
| ko02010 | ABC transporters                            | 4  | 0.999996 |
| ko05168 | Herpes simplex infection                    | 9  | 0.999996 |
| ko05410 | Hypertrophic cardiomyopathy (HCM)           | 11 | 0.999996 |
| ko00510 | N-Glycan biosynthesis                       | 2  | 0.999996 |
| ko00100 | Steroid biosynthesis                        | 1  | 0.999996 |
| ko04140 | Regulation of autophagy                     | 1  | 0.999996 |
| ko05414 | Dilated cardiomyopathy                      | 11 | 0.999996 |
| ko04621 | NOD-like receptor signaling pathway         | 3  | 0.999996 |
| ko00512 | Mucin type O-Glycan biosynthesis            | 1  | 0.999996 |
| ko04260 | Cardiac muscle contraction                  | 8  | 0.999996 |
| ko04013 | MAPK signaling pathway - fly                | 1  | 0.999996 |
| ko00630 | Glyoxylate and dicarboxylate metabolism     | 1  | 0.999996 |
| ko04710 | Circadian rhythm - mammal                   | 1  | 0.999996 |
| ko05162 | Measles                                     | 7  | 0.999996 |
| ko04340 | Hedgehog signaling pathway                  | 3  | 0.999996 |
| ko04145 | Phagosome                                   | 9  | 0.999996 |
| ko00052 | Galactose metabolism                        | 2  | 0.999996 |
| ko04971 | Gastric acid secretion                      | 6  | 0.999996 |
| ko04612 | Antigen processing and presentation         | 4  | 0.999996 |
| ko00410 | beta-Alanine metabolism                     | 1  | 0.999996 |
| ko04966 | Collecting duct acid secretion              | 1  | 0.999996 |
| ko00982 | Drug metabolism - cytochrome P450           | 1  | 0.999996 |
| ko04360 | Axon guidance                               | 11 | 0.999996 |
| ko00250 | Alanine, aspartate and glutamate metabolism | 1  | 0.999996 |
| ko05145 | Toxoplasmosis                               | 7  | 0.999996 |
| ko00030 | Pentose phosphate pathway                   | 1  | 0.999996 |
| ko00500 | Starch and sucrose metabolism               | 3  | 0.999996 |
| ko04964 | Proximal tubule bicarbonate reclamation     | 1  | 0.999996 |
| ko05166 | HTLV-I infection                            | 13 | 0.999996 |
| ko05223 | Non-small cell lung cancer                  | 3  | 0.999996 |
| ko05212 | Pancreatic cancer                           | 3  | 0.999996 |
| ko00640 | Propanoate metabolism                       | 1  | 0.999996 |
| ko00053 | Ascorbate and aldarate metabolism           | 1  | 0.999996 |

|         |                                                            |    |          |
|---------|------------------------------------------------------------|----|----------|
| ko05217 | Basal cell carcinoma                                       | 4  | 0.999996 |
| ko04630 | Jak-STAT signaling pathway                                 | 4  | 0.999996 |
| ko00980 | Metabolism of xenobiotics by cytochrome P450               | 1  | 0.999996 |
| ko05160 | Hepatitis C                                                | 5  | 0.999996 |
| ko05142 | Chagas disease (American trypanosomiasis)                  | 5  | 0.999996 |
| ko04010 | MAPK signaling pathway                                     | 15 | 0.999996 |
| ko00270 | Cysteine and methionine metabolism                         | 1  | 0.999996 |
| ko04950 | Maturity onset diabetes of the young                       | 1  | 0.999996 |
| ko04144 | Endocytosis                                                | 13 | 0.999996 |
| ko05222 | Small cell lung cancer                                     | 4  | 0.999996 |
| ko04721 | Synaptic vesicle cycle                                     | 3  | 0.999996 |
| ko04062 | Chemokine signaling pathway                                | 9  | 0.999996 |
| ko04664 | Fc epsilon RI signaling pathway                            | 3  | 0.999996 |
| ko05202 | Transcriptional misregulation in cancer                    | 9  | 0.999996 |
| ko00760 | Nicotinate and nicotinamide metabolism                     | 1  | 0.999996 |
| ko04380 | Osteoclast differentiation                                 | 5  | 0.999996 |
| ko00480 | Glutathione metabolism                                     | 1  | 0.999996 |
| ko04920 | Adipocytokine signaling pathway                            | 3  | 0.999996 |
| ko04530 | Tight junction                                             | 13 | 0.999996 |
| ko04662 | B cell receptor signaling pathway                          | 4  | 0.999996 |
| ko03320 | PPAR signaling pathway                                     | 3  | 0.999996 |
| ko00562 | Inositol phosphate metabolism                              | 3  | 0.999996 |
| ko05140 | Leishmaniasis                                              | 2  | 0.999996 |
| ko05152 | Tuberculosis                                               | 8  | 0.999996 |
| ko05120 | Epithelial cell signaling in Helicobacter pylori infection | 2  | 0.999996 |
| ko04330 | Notch signaling pathway                                    | 2  | 0.999996 |
| ko04520 | Adherens junction                                          | 6  | 0.999996 |
| ko00830 | Retinol metabolism                                         | 1  | 0.999996 |
| ko05221 | Acute myeloid leukemia                                     | 2  | 0.999996 |
| ko00240 | Pyrimidine metabolism                                      | 5  | 0.999996 |
| ko05340 | Primary immunodeficiency                                   | 1  | 0.999996 |
| ko00051 | Fructose and mannose metabolism                            | 1  | 0.999996 |
| ko04640 | Hematopoietic cell lineage                                 | 2  | 0.999996 |
| ko05213 | Endometrial cancer                                         | 2  | 0.999996 |
| ko04961 | Endocrine and other factor-regulated calcium reabsorption  | 2  | 0.999996 |
| ko05200 | Pathways in cancer                                         | 18 | 0.999996 |

|         |                                                           |    |          |
|---------|-----------------------------------------------------------|----|----------|
| ko04320 | Dorso-ventral axis formation                              | 1  | 0.999996 |
| ko05210 | Colorectal cancer                                         | 2  | 0.999996 |
| ko05412 | Arrhythmogenic right ventricular<br>cardiomyopathy (ARVC) | 3  | 0.999996 |
| ko05164 | Influenza A                                               | 7  | 0.999996 |
| ko04514 | Cell adhesion molecules (CAMs)                            | 5  | 0.999996 |
| ko00564 | Glycerophospholipid metabolism                            | 2  | 0.999996 |
| ko04012 | ErbB signaling pathway                                    | 3  | 0.999996 |
| ko05014 | Amyotrophic lateral sclerosis (ALS)                       | 3  | 0.999996 |
| ko05020 | Prion diseases                                            | 3  | 0.999996 |
| ko00190 | Oxidative phosphorylation                                 | 2  | 0.999996 |
| ko05211 | Renal cell carcinoma                                      | 2  | 0.999996 |
| ko04670 | Leukocyte transendothelial migration                      | 6  | 0.999996 |
| ko05215 | Prostate cancer                                           | 3  | 0.999996 |
| ko04962 | Vasopressin-regulated water<br>reabsorption               | 2  | 0.999996 |
| ko04978 | Mineral absorption                                        | 1  | 0.999996 |
| ko04960 | Aldosterone-regulated sodium<br>reabsorption              | 1  | 0.999996 |
| ko05323 | Rheumatoid arthritis                                      | 1  | 0.999996 |
| ko05214 | Glioma                                                    | 2  | 0.999996 |
| ko04976 | Bile secretion                                            | 3  | 0.999996 |
| ko04660 | T cell receptor signaling pathway                         | 3  | 0.999996 |
| ko00230 | Purine metabolism                                         | 7  | 0.999996 |
| ko05218 | Melanoma                                                  | 1  | 0.999996 |
| ko04912 | GnRH signaling pathway                                    | 3  | 0.999996 |
| ko04070 | Phosphatidylinositol signaling<br>system                  | 3  | 0.999996 |
| ko04914 | Progesterone-mediated oocyte<br>maturation                | 2  | 0.999996 |
| ko04310 | Wnt signaling pathway                                     | 6  | 0.999996 |
| ko04910 | Insulin signaling pathway                                 | 5  | 0.999996 |
| ko01100 | Metabolic pathways                                        | 44 | 0.999996 |
| ko04150 | mTOR signaling pathway                                    | 1  | 0.999996 |
| ko05133 | Pertussis                                                 | 1  | 0.999996 |
| ko05010 | Alzheimer's disease                                       | 4  | 0.999996 |
| ko04540 | Gap junction                                              | 2  | 0.999996 |
| ko04720 | Long-term potentiation                                    | 2  | 0.999996 |
| ko04972 | Pancreatic secretion                                      | 2  | 0.999996 |
| ko04724 | Glutamatergic synapse                                     | 3  | 0.999996 |
| ko05012 | Parkinson's disease                                       | 1  | 0.999996 |
| ko04060 | Cytokine-cytokine receptor                                | 2  | 0.999996 |

|         |                                              |   |          |
|---------|----------------------------------------------|---|----------|
|         | interaction                                  |   |          |
| ko03020 | RNA polymerase                               | 1 | 0.999996 |
| ko04370 | VEGF signaling pathway                       | 1 | 0.999996 |
| ko05034 | Alcoholism                                   | 2 | 0.999996 |
| ko04650 | Natural killer cell mediated<br>cytotoxicity | 1 | 0.999996 |
| ko04114 | Oocyte meiosis                               | 1 | 0.999996 |
| ko04916 | Melanogenesis                                | 2 | 0.999996 |
| ko04020 | Calcium signaling pathway                    | 4 | 0.999996 |
| ko05016 | Huntington's disease                         | 4 | 0.999996 |
| ko04726 | Serotonergic synapse                         | 1 | 0.999996 |
| ko04970 | Salivary secretion                           | 2 | 0.999996 |
| ko04080 | Neuroactive ligand-receptor<br>interaction   | 2 | 0.999996 |

---

## 6. Loss of conserved noncoding elements (CNEs)

### Methods

#### Genome-wide conserved noncoding element (CNE) prediction

##### Whole-genome alignments

Using zebrafish as the reference genome, whole-genome alignments of six teleost fishes were generated. The soft-masked genome sequence for zebrafish (Zv9, Apr-2010) was downloaded from Ensembl release-75 FTP site. The following soft-masked genome sequences were downloaded from the UCSC Genome Browser: stickleback (gasAcu1, Feb-2006), fugu (fr3, Oct-2011), medaka (oryLat2, Oct-2005), Nile tilapia (oreNil2, Feb-2012). The *H. comes* genome sequence (hipCom0) was repeat-masked using WindowMasker (from NCBI BLAST+ package v2.2.28) with additional parameter “-dust true”. About 32% (158.1 / 501.6 Mb) of the *H. comes* genome was masked using this method.

Only chromosome sequences of zebrafish were aligned while unplaced scaffolds were excluded. The reference (zebrafish) genome was split into 21 Mb sequences with 10-kb overlap, while the percomorph fish genomes (seahorse, stickleback, fugu, medaka and Nile tilapia) were split into 10 Mb sequences with no overlap. Pairwise alignments were carried out using Lastz v1.03.54<sup>44</sup> with the following parameters: --strand=both --seed=12of19 --notransition --chain --gapped --gap=400,30 --hsptthresh=3000 --gappedthresh=3000 --inner=2000 --masking=50 --ydrop=9400 --scores=HoxD55.q --format=axt. Coordinates of split sequences were restored to genome coordinates using an in-house Perl script. The alignments were reduced to single-coverage with respect to the reference genome using UCSC Genome Browser tools ‘axtChain’ and ‘chainNet’. Multiple alignments were generated using Multiz.v11.2/roast.v3<sup>45</sup> with the tree topology “(Zv9 (hipCom0 ((fr3 gasAcu1) (oryLat2 oreNil2))))”<sup>46,47</sup>.

##### Identification of conserved elements

Four-fold degenerate (4D) sites of zebrafish genes (Ensembl release-75) were extracted from the multiple alignments. These 4D sites were used to build a neutral model using PhyloFit in the rphast v1.5 package<sup>48</sup> (general reversible “REV” substitution model). PhastCons was then run in rho-estimation mode on each of the zebrafish chromosomal alignments to obtain a conserved model for each chromosome. These conserved models were averaged into one model using PhyloBoot. Subsequently, conserved elements were predicted in the multiple alignments using PhastCons with the following inputs and parameters: the neutral and conserved models, target coverage of input alignments = 0.3 and average length of conserved sequence = 45 bp. To assess the sensitivity of this approach in identifying functional elements, the PhastCons elements were compared against zebrafish protein-coding genes. 80% of protein-coding exons (197,508/245,556 exons) were overlapped by a conserved element (minimum coverage 10%), indicating



that the identification method was fairly sensitive.

### **Classification of conserved elements**

The conserved elements were classified as follows. Firstly, elements that were shorter than 30 bp were excluded. Secondly, the conserved elements were segregated into repetitive sequences ( $\geq 30\%$  of bases were repeat-masked), exonic (overlapping known protein-coding genes or noncoding RNA in Ensembl-75 zebrafish gene-build), and non-exonic. Thirdly, the non-exonic elements were filtered against zebrafish mRNAs (~33,000), spliced ESTs (1.3 million) downloaded from the UCSC Genome Browser for 'danRer7' assembly, and vertebrate proteins obtained from Uniprot (~238,000 proteins in 'complete' and 'reference' vertebrate proteomes; BLASTX at  $1e-5$ ). A total of 638,280 conserved elements ( $\geq 30$  bp) that span 9.0% (122.5/1,357.1 Mb) of the zebrafish genome were identified. The conserved elements that were neither exonic based on known genes, nor potentially protein-coding, nor repetitive sequence were classified as conserved noncoding elements (CNEs). Finally, each of the zebrafish CNEs was assigned to the protein-coding gene whose transcription start site was nearest to the CNE within 1 Mb in the genome (Ensembl release-75 zebrafish genes).

### **Conservation or loss of CNEs in teleost fish genomes**

A CNE was considered present in a percomorph genome if it showed a coverage of at least 30% with a zebrafish CNE in Multiz alignment. To identify CNEs that could have been missed in the Multiz alignments due to rearrangements in the genomes, or due to partitioning of the CNEs among teleost fish duplicate genes, we searched the zebrafish CNEs against the genome of the percomorph using BLASTN ( $E < 1e-10$ ;  $\geq 80\%$  identity;  $\geq 30\%$  coverage). Those CNEs that had no significant match in a percomorph genome were considered as missing in that genome. In order to account for CNEs that might have been missed due to sequencing gaps, we identified gap-free syntenic intervals in zebrafish and the percomorph genomes, and generated a set of CNEs that were missing from these intervals. These CNEs represent a high-confident set of CNEs missing in the percomorph fishes and thus were used for further analysis.

### **Functional enrichment of genes associated with CNEs**

Functional enrichment of genes associated with CNEs was carried out using the GREAT software<sup>49</sup> with each CNE assigned to the genes with the nearest transcription start site and within 1 Mb in the zebrafish genome, and significantly enriched functional categories identified based on a hypergeometric test of genomic regions (FDR  $q$ -value  $< 0.05$ ). We identified the statistically significant GO biological process terms, molecular function terms and zebrafish phenotype descriptions of the genes that are associated with CNEs.

### **Identification CNEs in Hox clusters**

Repeat-masked Hox cluster sequences of zebrafish, fugu, stickleback and medaka were extracted from UCSC (<http://genome-euro.ucsc.edu/>). Repeat sequences in the seahorse

Hox clusters were masked using the CENSOR repeat-masking web-server (<http://www.girinst.org/censor/index.php>). Orthologous, repeat-masked Hox cluster sequences (HoxAa, HoxAb, HoxBa, HoxBb, HoxCa, HoxDa and HoxDb) from the five teleosts were aligned using the global alignment program MLAGAN<sup>50</sup> with the zebrafish sequence as the base. CNEs were predicted using VISTA<sup>51</sup> at a cut-off of  $\geq 70\%$  identity over  $>100$  bp windows. For counting CNEs that are uniquely lost in a fish, we considered only non-gap regions of the Hox cluster sequences.

### Transgenic assay of CNEs

Seven representative zebrafish CNEs that are lost in seahorse (the largest among the lost CNEs) were assayed for enhancer activity in transgenic zebrafish using GFP as the reporter gene. For every CNE that we selected for functional assay, we identified the gene with the nearest transcription start site as the associated gene. To confirm the absence of these CNEs in seahorse, we realigned the loci of the associated genes in zebrafish, seahorse, stickleback, fugu, medaka and Nile tilapia, including the immediate flanking genes. The realignment was carried out using the global alignment program MLAGAN<sup>50</sup> and the alignment was visualized using VISTA<sup>51</sup> with sequence conservation criteria of 70% identity over 100 bp.

The CNEs were amplified by PCR using zebrafish genomic DNA as template. The products were cloned into a miniTol2 transposon donor plasmid linked to the mouse *cFos* (McFos) basal promoter and the coding sequence of GFP. Transposase mRNA was generated by transcribing cDNA *in vitro* using the mMACHINE mMESSAGE T7 kit (Ambion; Life Technologies, United States). The CNE-containing McFos-miniTol2 construct and transposase mRNA were co-injected into the yolk of zebrafish embryos at the one to two-cell stage. Each CNE construct was injected into 250-350 embryos and the injections were repeated on two days. The embryos were reared at 28°C, and GFP was observed at 24, 48 and 72 hours post fertilization (hpf). The survival rate of the embryos post-injection was 70-80%. Consistent GFP expression in at least 20% of F0 embryos was considered as specific expression driven by a CNE. Such embryos were reared to maturity and mated with wild type zebrafish to produce F1 lines. The expression of GFP in F1 embryos was observed under a compound microscope fitted for epifluorescence (Axio imager M2; Carl Zeiss, Germany) and photographed using an attached digital microscope camera (AxioCam; Carl Zeiss, Germany). Pigmentation was inhibited by maintaining zebrafish embryos in 0.003% N-phenylthiourea (Sigma-Aldrich, Sweden) from 8 hpf onwards. Consistent GFP expression observed in at least three lines of F1 fishes was considered as the specific expression driven by a CNE.

## Results

### Identification of genome-wide CNEs

CNEs were predicted in the genomes of seahorse and five representative teleost fishes (zebrafish, stickleback, fugu, medaka and Nile tilapia). Zebrafish represents the

Ostariophysii clade whereas the rest are members of the Percomorpha clade. Ostariophysii and Percomorpha constitute the two most distantly related clades of the clupecocephalan lineage<sup>46</sup> which includes ~96% of extant teleosts<sup>52</sup>. The clupecocephalans shared a common ancestor approximately 275 million years ago<sup>47</sup>. For CNE prediction, whole genome sequences were aligned using Multiz with zebrafish as the reference genome (see Methods). A non-conserved model was estimated from the four-fold degenerate sites of the multi-genome alignment and was used to predict genomic regions that were under higher selective constraint than neutrally evolving DNA. After filtering protein-coding and RNA gene sequences (see Methods), a total of 239,976 conserved noncoding elements (CNEs) were identified. These CNEs are noncoding regions that are under evolutionary constraint in zebrafish and at least one of the five percomorph fishes over the last 275 million years of evolution. They total 40.3 Mb, have an average size of 168 bp and span 3.0% of the zebrafish genome.

We determined the coverage of the CNEs in each of the percomorph genomes. The species in descending order of number of CNEs are: Nile tilapia (135,573 CNEs), medaka (103,198 CNEs), stickleback (96,647 CNEs), seahorse (80,857 CNEs) and fugu (69,623 CNEs) (Supplementary Table 6.2). Among these CNEs, a set of 17,744 CNEs (average 197 bp) are present in all the six teleost fishes, which we term as “pan-teleost” CNEs (Supplementary Table 6.2). The pan-teleost CNEs likely play a fundamental role in the development, morphology and physiology of the teleost fishes. To determine the functions of genes associated with these pan-teleost CNEs, we first assigned each CNE to the gene whose transcription start site was nearest to the CNE in the zebrafish genome. A total of 4,059 genes were found to be associated with these CNEs. Next we carried out functional enrichment analysis of the 17,744 pan-teleost CNEs (average 197 bp) against all CNEs as the background dataset using the GREAT software<sup>49</sup>. Pan-teleost CNEs were found to be preferentially associated with genes that are involved in the development of the midbrain-hindbrain boundary, cerebellum, eye and rostrocaudal patterning of the neural tube (Supplementary Table 6.5), genes that encode steroid hormone receptors, O-methyltransferases, or protein transporters (Supplementary Table 6).

### Genome-wide CNE loss

To determine the extent of CNEs lost in seahorse, we searched for CNEs that are uniquely lost in each of the percomorph fishes. We accounted for CNEs that may not have been detected in the Multiz alignments due to partitioning of duplicated genomic regions (see Methods) and restricted our analyses to a high-confidence set of CNEs situated in gap-free syntenic intervals (Supplementary Table 6.3). Interestingly, seahorse was found to have lost the highest number of CNEs that are conserved in the other percomorphs. In total, 1,612 CNEs were lost in seahorse which is substantially higher than that lost in fugu (1,050 CNEs), stickleback (843 CNEs), medaka (335 CNEs) and Nile tilapia (281 CNEs) (Supplementary Table 6.4).

To determine the type of genes associated with CNEs specifically lost in seahorse, we

first identified the homologous zebrafish CNEs and then assigned these CNEs to their nearest gene in the zebrafish genome. The zebrafish CNEs whose homologs are lost in seahorse are associated with a total of 728 genes. To identify the functional categories of these genes and the pathways they are involved in, we carried out functional enrichment analysis against genes associated with all the CNEs in the zebrafish genome. The genes associated with the CNEs lost in seahorse are involved in the regulation of transcription, positive regulation of fibroblast growth factor receptor signaling pathway and embryonic pectoral fin morphogenesis (Supplementary Table 6.8). They also possess DNA-binding transcription factor activity, steroid hormone receptor activity and O-acetyltransferase activity (Supplementary Table 6.9).

The top 20 genes with the highest number and proportion of CNEs lost uniquely in seahorse genome are listed in Supplementary Table 6.10 and Supplementary Table 6.11, respectively. All these genes are conserved in seahorse despite the loss of a large number of CNEs associated with them. They include *Sall1a* (Sal-like protein 1a), *Shox* (short stature homeobox), and *Irx5a* (Iroquois homeobox protein 5a) genes. *Sall1* together with other members of the family of *spalt* genes, are required for the normal development of limbs, nervous system, kidney and heart in vertebrates<sup>53</sup>. *Sall1* is regulated by FGF and WNT signaling in developing limb buds of chicken<sup>54</sup>. In zebrafish, *Sall1* is regulated by *tbx5* in pectoral fin development and is required for regulation of FGF signaling along with *sall4*<sup>55</sup>. *Shox* encodes a transcription factor that is involved in skeletal system development. Mutations in the human *SHOX* gene result in Leri-Weill dyschondrosteosis (LWD), a dominantly inherited skeletal dysplasia that is characterized by moderate short stature caused mainly by short mesomelic limb segments<sup>56</sup>. A ~200-kb human genomic interval was found to be deleted in individuals who had two intact copies of *SHOX* and yet displayed LWD-type malformations associated with *SHOX* haploinsufficiency<sup>57</sup>. The seahorse genomic region orthologous to this interval has lost several teleost CNEs. In developing zebrafish embryos, *shox* is expressed in the blood, putative heart, hatching gland, brain pharyngeal arch, olfactory epithelium, and fin bud apical ectodermal ridge<sup>58</sup>. *Irx5* is part of the Iroquois family of genes and is required for the formation of the proximal and anterior limb skeleton<sup>59</sup>, differentiation of retinal bipolar interneurons<sup>60</sup> and establishing the cardiac ventricular repolarization gradient in mouse<sup>61</sup>. In human, mutations in the *IRX5* homeodomain result in a recessive congenital disorder that affects development of the face, brain, blood, heart, bone and gonads<sup>62</sup>. It is possible that loss of CNEs associated with these genes in seahorse could have led to phenotypic changes.

### CNEs lost from Hox clusters

We predicted CNEs in the Hox clusters of seahorse and other representative teleost fishes using the global alignment program MLAGAN. Orthologous Hox clusters were aligned using MLAGAN with zebrafish as the reference sequence and CNEs were predicted using VISTA. VISTA plots of two representative Hox clusters, HoxCa and HoxDa, are shown in Supplementary Figure 2 and Supplementary Figure 3, respectively.

Interestingly, seahorse shares the least number of CNEs with zebrafish (186 CNEs) when compared to fugu, stickleback or medaka (214 to 235 CNEs) (Supplementary Table 6.7). We next searched for CNEs that were uniquely lost in seahorse, fugu, stickleback and medaka. Indeed, seahorse was found to have lost the highest number of CNEs (23 CNEs) compared to the other three teleosts (fugu: 4 CNEs, stickleback: 2 CNEs and medaka: 9 CNEs).

### **Functional assay of CNEs**

Details of the seven zebrafish CNEs selected for functional assay in transgenic zebrafish and their expression patterns are presented in Supplementary Table 6.12.

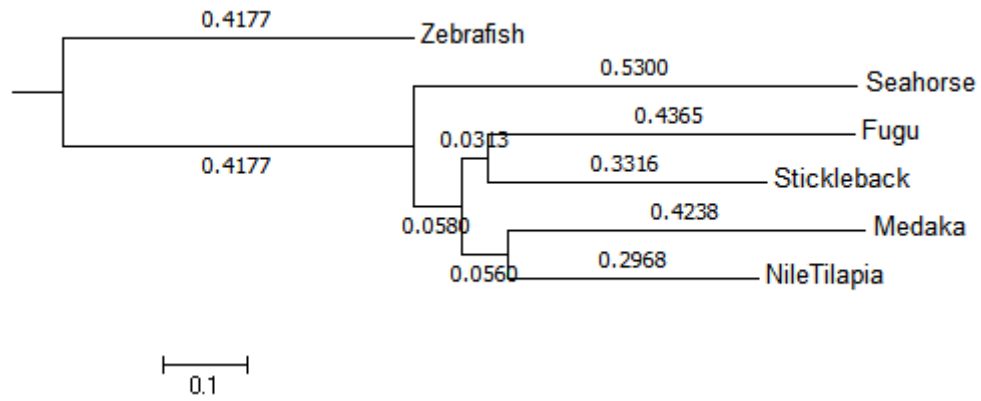

**Supplementary Figure 6.1** Neutral tree for teleost fish genomes used in whole-genome alignments.

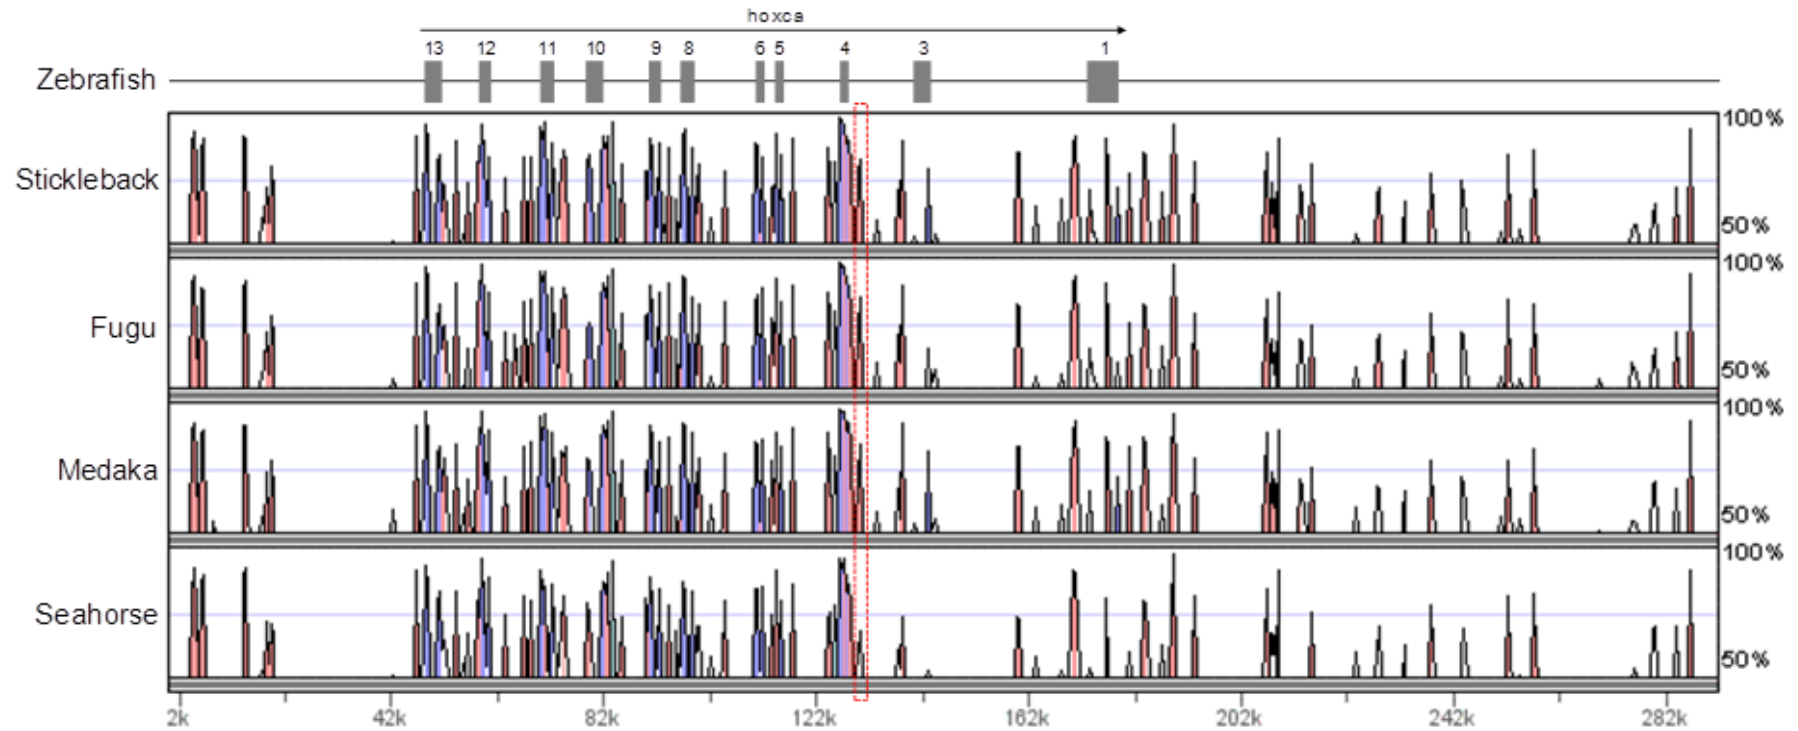

**Supplementary Figure 6.2** Conserved noncoding elements (CNEs) in the *HoxCa* cluster of seahorse and other teleosts. Zebrafish is the reference sequence. Blue peaks represent conserved exons whereas pink peaks represent CNEs. The x-axis represents the base sequence whereas the y-axis denotes percentage identity. The red dotted box highlights CNE1 which is lost only in seahorse and was used for transgenic assay in zebrafish.

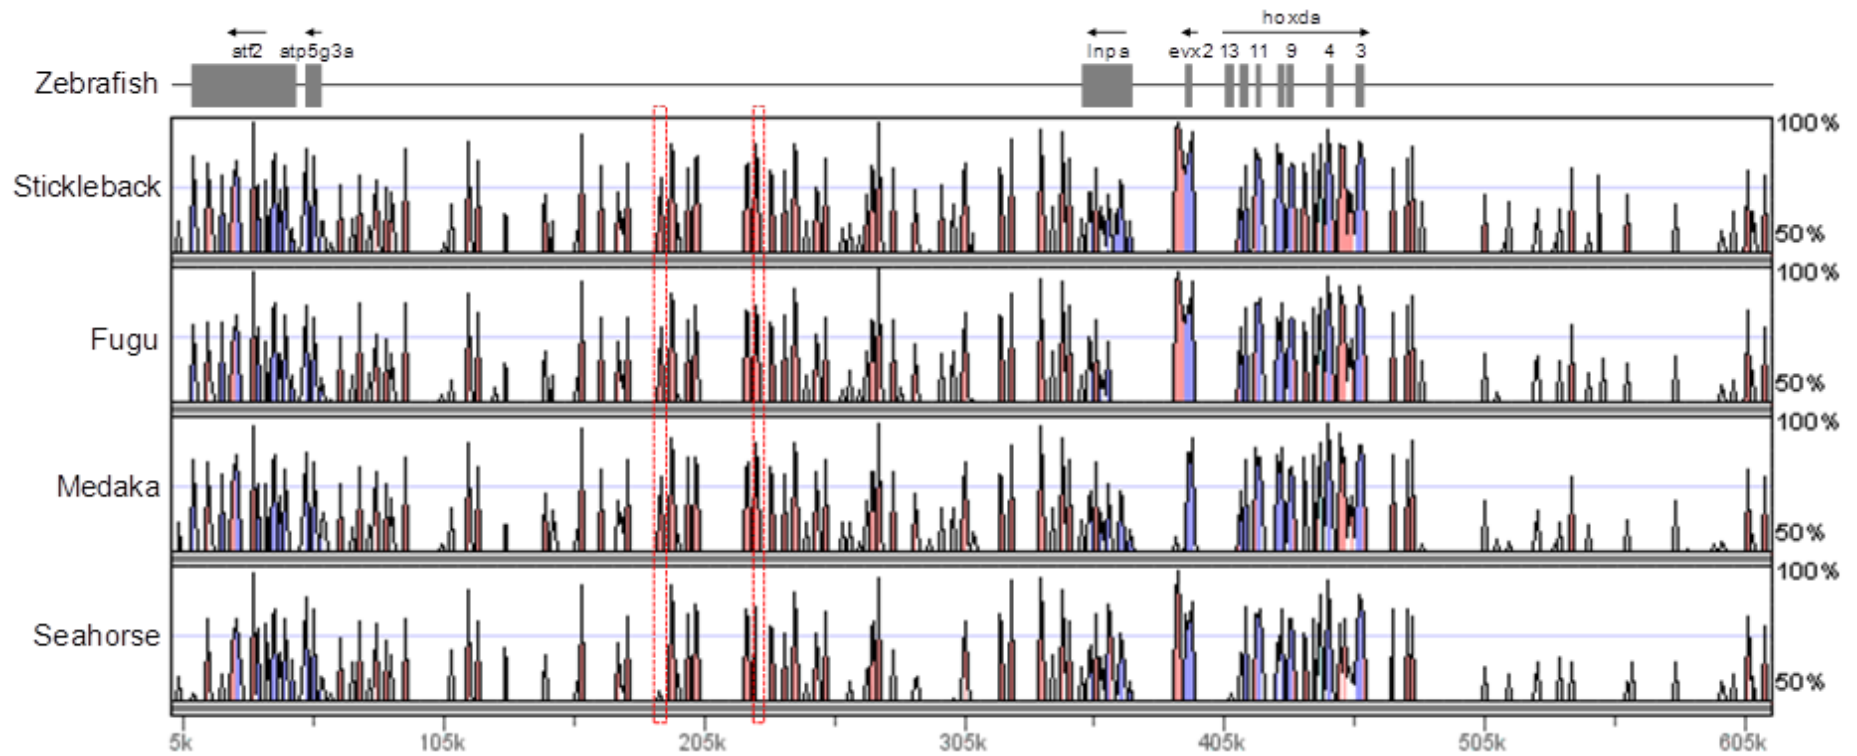

**Supplementary Figure 6.3** Conserved noncoding elements (CNEs) in the HoxDa cluster of seahorse and other teleosts. Zebrafish is the reference sequence. Blue peaks represent conserved exons whereas pink peaks represent CNEs. The x-axis represents the base sequence whereas the y-axis denotes percentage identity. The red dotted boxes highlight CNE2 and CNE3 which are lost only in seahorse and were used for transgenic assay in zebrafish.



**Supplementary Table 6.1** Statistics of conserved elements in the seahorse genome.

| Type                                                                                            | Count   | Total length (bp) | Shortest (bp) | Longest (bp) | Average (bp) | Median (bp) |
|-------------------------------------------------------------------------------------------------|---------|-------------------|---------------|--------------|--------------|-------------|
| Repetitive sequences                                                                            | 87,604  | 20,803,479        | 30            | 4,705        | 237          | 161         |
| Exonic elements                                                                                 |         |                   |               |              |              |             |
| <ul style="list-style-type: none"> <li>Known genes (protein-coding or noncoding RNA)</li> </ul> | 278,271 | 54,001,002        | 30            | 9,938        | 194          | 144         |
| <ul style="list-style-type: none"> <li>mRNA</li> </ul>                                          | 2,533   | 491,931           | 30            | 2,054        | 194          | 130         |
| <ul style="list-style-type: none"> <li>Spliced ESTs</li> </ul>                                  | 26,399  | 5,749,652         | 30            | 3,348        | 218          | 145         |
| <ul style="list-style-type: none"> <li>BLASTX hit in vertebrate Uniprot (E&lt;1e-5)</li> </ul>  | 3,497   | 1,131,307         | 56            | 3,638        | 324          | 223         |
| Noncoding elements (CNEs)                                                                       | 239,976 | 40,323,876        | 30            | 2,860        | 168          | 113         |
| All elements                                                                                    | 638,280 | 122,501,247       | 30            | 9,938        | 192          | 135         |

**Supplementary Table 6.2** Number and statistics of CNEs present in each of the percomorph fishes and in all five percomorph fishes plus zebrafish (“pan-teleost CNEs”)

| Class of CNEs           | Count   | Total length (Kb) | Average length (bp) | Median length (bp) |
|-------------------------|---------|-------------------|---------------------|--------------------|
| All CNEs                | 239,976 | 40,324            | 168                 | 113                |
| Present in Seahorse     | 80,857  | 13,814            | 171                 | 114                |
| Present in Fugu         | 69,623  | 11,998            | 172                 | 116                |
| Present in Stickleback  | 96,647  | 15,623            | 162                 | 111                |
| Present in Medaka       | 103,198 | 17,978            | 174                 | 114                |
| Present in Nile tilapia | 135,573 | 23,250            | 171                 | 117                |
| Pan-teleost CNEs        | 17,744  | 3,496             | 197                 | 134                |

**Supplementary Table 6.3** Gap-free syntenic intervals in zebrafish and other teleost fish genomes. Gap-free syntenic intervals in 2 genomes were defined as contiguous (gap-free) genomic regions not exceeding 500 kb that are flanked by 2 orthologous alignments of at least 70% identity over 100 bp, and occurring in the same order and orientation in both genomes.

| <b>Genome</b> | <b>Count</b> | <b>Avg. size (bp)</b> | <b>Median size (bp)</b> |
|---------------|--------------|-----------------------|-------------------------|
| Seahorse      | 54,240       | 2,373                 | 1,137                   |
| Fugu          | 55,050       | 1,989                 | 898                     |
| Stickleback   | 57,634       | 2,514                 | 1,106                   |
| Medaka        | 45,208       | 1,636                 | 946                     |
| Nile tilapia  | 65,296       | 2,592                 | 1,270                   |

**Supplementary Table 6.4** Number of CNEs absent in one of the percomorph fish genomes. A CNE was deemed to be absent or missing in a percomorph genome if it was not detected in Multiz or BLASTN alignments (see Methods), and derived from gap-free syntenic intervals in the percomorph and zebrafish genomes.

| <b>Genome</b> | <b>CNEs not detected in Multiz or BLASTN alignments</b> | <b>CNEs derived from gap-free syntenic intervals</b> |
|---------------|---------------------------------------------------------|------------------------------------------------------|
| Seahorse      | 5,277                                                   | 1,612                                                |
| Fugu          | 3,797                                                   | 1,050                                                |
| Stickleback   | 4,456                                                   | 843                                                  |
| Medaka        | 2,827                                                   | 335                                                  |
| Nile tilapia  | 1,225                                                   | 281                                                  |

**Supplementary Table 6.5** Top 20 statistically significant (FDR q-value < 0.05) GO biological process terms (pan-teleost CNEs)

| Term Name                               | FDR Q-Val | Fold Enrichment | Foreground Regions | Background Regions | Foreground Gene Hits |
|-----------------------------------------|-----------|-----------------|--------------------|--------------------|----------------------|
| midbrain-hindbrain boundary development | 2.67E-82  | 4.83            | 206                | 577                | 5                    |
| midbrain development                    | 6.57E-69  | 3.52            | 254                | 975                | 14                   |
| hindbrain formation                     | 3.80E-65  | 6.52            | 120                | 249                | 2                    |
| cerebellum formation                    | 3.80E-65  | 6.52            | 120                | 249                | 2                    |
| embryonic camera-type eye development   | 2.55E-61  | 3.44            | 234                | 921                | 12                   |
| embryonic camera-type eye morphogenesis | 9.80E-59  | 4.00            | 183                | 618                | 7                    |
| neural tube patterning                  | 2.92E-57  | 3.59            | 206                | 777                | 5                    |
| rostrocaudal neural tube patterning     | 2.92E-57  | 3.59            | 206                | 777                | 5                    |
| hindbrain development                   | 5.99E-53  | 2.45            | 354                | 1955               | 19                   |
| peripheral nervous system development   | 8.25E-53  | 3.14            | 230                | 991                | 10                   |
| neural tube development                 | 1.29E-52  | 2.54            | 327                | 1739               | 20                   |
| anterior/posterior pattern formation    | 3.75E-46  | 2.03            | 466                | 3098               | 36                   |
| vesicle-mediated transport              | 1.36E-42  | 2.04            | 429                | 2848               | 37                   |
| cerebellum morphogenesis                | 9.55E-41  | 3.98            | 128                | 435                | 3                    |
| cerebellum development                  | 4.70E-40  | 3.93            | 128                | 441                | 3                    |
| hindbrain morphogenesis                 | 1.10E-39  | 3.49            | 148                | 573                | 6                    |
| otic placode formation                  | 2.02E-35  | 3.21            | 149                | 627                | 9                    |
| embryonic eye morphogenesis             | 3.87E-35  | 2.76            | 189                | 927                | 13                   |
| thyroid gland development               | 4.29E-35  | 3.66            | 123                | 455                | 4                    |
| homophilic cell adhesion                | 7.06E-35  | 2.05            | 345                | 2273               | 30                   |

**Supplementary Table 6.6.** Top 20 statistically significant (FDR q-value < 0.05) GO molecular function terms (pan-teleost CNEs).

| Term Name                                                             | FDR Q-Val   | Fold Enrichment | Foreground Regions | Background Regions | Foreground Gene Hits |
|-----------------------------------------------------------------------|-------------|-----------------|--------------------|--------------------|----------------------|
| steroid hormone receptor activity                                     | 3.39E-99    | 2.71            | 549                | 2744               | 29                   |
| ligand-dependent nuclear receptor activity                            | 3.39E-99    | 2.71            | 549                | 2744               | 29                   |
| O-methyltransferase activity                                          | 6.06E-31    | 3.79            | 104                | 371                | 5                    |
| protein transporter activity                                          | 3.94E-22    | 2.53            | 140                | 747                | 8                    |
| transcription activator activity                                      | 1.43E-21    | 2.42            | 149                | 832                | 15                   |
| alcohol dehydrogenase (NAD) activity                                  | 1.44E-14    | 7.19            | 25                 | 47                 | 1                    |
| hexokinase activity                                                   | 4.64E-14    | 3.41            | 55                 | 218                | 1                    |
| positive transcription elongation factor activity                     | 2.17E-10    | 5.55            | 23                 | 56                 | 1                    |
| histone deacetylase binding                                           | 4.36E-10    | 4.36            | 29                 | 90                 | 1                    |
| thymidylate kinase activity                                           | 3.55E-09    | 3.56            | 34                 | 129                | 1                    |
| nucleotide kinase activity                                            | 6.10E-09    | 2.56            | 56                 | 296                | 3                    |
| asparagine-tRNA ligase activity                                       | 2.81E-07    | 4.37            | 21                 | 65                 | 1                    |
| carbohydrate kinase activity                                          | 4.44E-07    | 2.18            | 62                 | 385                | 2                    |
| protein-L-isoaspartate (D-aspartate) O-methyltransferase activity     | 9.33E-07    | 3.38            | 27                 | 108                | 1                    |
| phosphotransferase activity, phosphate group as acceptor              | 1.77563E-06 | 2.03            | 67                 | 446                | 6                    |
| oxo-acid-lyase activity                                               | 1.86282E-06 | 3.94            | 21                 | 72                 | 2                    |
| transcription elongation regulator activity                           | 2.23238E-06 | 3.09            | 29                 | 127                | 3                    |
| flavin-containing monooxygenase activity                              | 2.69563E-06 | 3.72            | 22                 | 80                 | 1                    |
| hydrogen ion transporting ATP synthase activity, rotational mechanism | 3.2514E-06  | 2.55            | 39                 | 207                | 5                    |
| aspartate-tRNA ligase activity                                        | 4.62863E-06 | 3.74            | 21                 | 76                 | 1                    |

**Supplementary Table 6.7** CNEs predicted in the Hox clusters of seahorse and other percomorph fishes (fugu, stickleback and medaka) using zebrafish as the reference sequence. CNEs that are uniquely lost in each of the percomorph teleost are also shown. Since zebrafish lacks the HoxDb cluster, stickleback was used as the base sequence in case of the HoxDb alignment (\*).

| Hox cluster | Number of CNEs present in |      |             |        | Number of CNEs lost specifically in |      |             |        |
|-------------|---------------------------|------|-------------|--------|-------------------------------------|------|-------------|--------|
|             | Seahorse                  | Fugu | Stickleback | Medaka | Seahorse                            | Fugu | Stickleback | Medaka |
| HoxAa       | 21                        | 24   | 28          | 27     | 2                                   | -    | -           | 1      |
| HoxAb       | 7                         | 8    | 10          | 5      | 1                                   | 1    | -           | 2      |
| HoxBa       | 17                        | 22   | 18          | 15     | -                                   | -    | 1           | 1      |
| HoxBb       | 6                         | 5    | 6           | 7      | 1                                   | 2    | 1           | -      |
| HoxCa       | 52                        | 66   | 71          | 64     | 5                                   | -    | -           | -      |
| HoxDa       | 67                        | 84   | 96          | 81     | 13                                  | 1    | -           | 4      |
| HoxDb       | 16                        | 26   | *           | 15     | 1                                   | -    | *           | 1      |
| Total       | 186                       | 235  | 229         | 214    | 23                                  | 4    | 2           | 9      |

**Supplementary Table 6.8** Top 20 genes with the highest number of CNEs lost in seahorse.

| No. | Gene name          | Gene description                                 | Total CNEs | Missing CNEs |
|-----|--------------------|--------------------------------------------------|------------|--------------|
| 1   | <i>fto</i>         | fat mass and obesity associated                  | 210        | 33           |
| 2   | <i>znf536</i>      | zinc finger protein 536                          | 401        | 23           |
| 3   | <i>sall1a</i>      | sal-like 1a                                      | 236        | 19           |
| 4   | <i>C13H10orf11</i> | chromosome 10 open reading frame 11              | 384        | 19           |
| 5   | <i>pax2a</i>       | paired box gene 2a                               | 229        | 17           |
| 6   | <i>shox</i>        | short stature homeobox                           | 135        | 16           |
| 7   | <i>sox14</i>       | SRY-box containing gene 14                       | 143        | 16           |
| 8   | <i>nrf1</i>        | nuclear respiratory factor 1                     | 140        | 15           |
| 9   | <i>lsm6</i>        | LSM6 homolog, U6 small nuclear RNA associated    | 77         | 14           |
| 10  | <i>irx5a</i>       | iroquois homeobox protein 5a                     | 318        | 14           |
| 11  | <i>gpr18</i>       | G protein-coupled receptor 18                    | 93         | 13           |
| 12  | <i>sox6</i>        | SRY-box containing gene 6                        | 268        | 13           |
| 13  | <i>mms22l</i>      | MMS22-like, DNA repair protein                   | 70         | 12           |
| 14  | <i>mef2aa</i>      | myocyte enhancer factor 2aa                      | 115        | 12           |
| 15  | <i>zfhx3</i>       | zinc finger homeobox 3                           | 223        | 12           |
| 16  | <i>nr2f1a</i>      | nuclear receptor subfamily 2, group F, member 1a | 321        | 12           |
| 17  | <i>lmo1</i>        | LIM domain only 1                                | 76         | 11           |
| 18  | <i>dachd</i>       | dachshund d                                      | 124        | 11           |
| 19  | <i>tox3</i>        | TOX high mobility group box family member 3      | 178        | 11           |
| 20  | <i>mab21l1</i>     | mab-21-like 1                                    | 134        | 10           |

**Supplementary Table 6.9** Top 20 genes with the highest percentage of CNEs lost in seahorse

| No. | Gene name             | Gene description                                               | Total CNEs | Missing CNEs | Percentage of missing CNEs |
|-----|-----------------------|----------------------------------------------------------------|------------|--------------|----------------------------|
| 1   | <i>tmem101</i>        | transmembrane protein 101                                      | 3          | 3            | 100.0%                     |
| 2   | <i>CABZ01041608.1</i> | Uncharacterized protein                                        | 1          | 1            | 100.0%                     |
| 3   | <i>hspb7</i>          | heat shock protein family, alpha-crystallin-related, b7        | 3          | 2            | 66.7%                      |
| 4   | <i>slc18a3a</i>       | solute carrier family 18 (vesicular acetylcholine), member 3a  | 3          | 2            | 66.7%                      |
| 5   | <i>shc1</i>           | SHC (Src homology 2 domain containing) transforming protein 1  | 14         | 7            | 50.0%                      |
| 6   | <i>CABZ01039301.1</i> | Uncharacterized protein                                        | 6          | 3            | 50.0%                      |
| 7   | <i>tbpl1</i>          | TBP-like 1                                                     | 6          | 3            | 50.0%                      |
| 8   | <i>bpifcl</i>         | BPI fold containing family C, like                             | 2          | 1            | 50.0%                      |
| 9   | <i>CT583700.1</i>     | Uncharacterized protein                                        | 2          | 1            | 50.0%                      |
| 10  | <i>CU928061.2</i>     | Uncharacterized protein                                        | 2          | 1            | 50.0%                      |
| 11  | <i>GP9</i>            | glycoprotein IX (platelet)                                     | 2          | 1            | 50.0%                      |
| 12  | <i>gpcpd1</i>         | glycerophosphocholine phosphodiesterase GDE1 homolog           | 2          | 1            | 50.0%                      |
| 13  | <i>ndrg1b</i>         | N-myc downstream regulated gene 1b                             | 2          | 1            | 50.0%                      |
| 14  | <i>nrg2a</i>          | neuregulin 2a                                                  | 2          | 1            | 50.0%                      |
| 15  | <i>SHF</i>            | Src homology 2 domain containing F                             | 2          | 1            | 50.0%                      |
| 16  | <i>tbc1d31</i>        | TBC1 domain family, member 31                                  | 2          | 1            | 50.0%                      |
| 17  | <i>wfs1a</i>          | Wolfram syndrome 1a (wolframin)                                | 2          | 1            | 50.0%                      |
| 18  | <i>chat</i>           | choline acetyltransferase                                      | 7          | 3            | 42.9%                      |
| 19  | <i>ogdha</i>          | oxoglutarate (alpha-ketoglutarate) dehydrogenase a (lipoamide) | 7          | 3            | 42.9%                      |
| 20  | <i>hoxc12a</i>        | homeobox C12a                                                  | 10         | 4            | 40.0%                      |

**Supplementary Table 6.10** Top 20 statistically significant (FDR q-value < 0.05) GO biological process terms (CNEs lost in seahorse).

| Term Name                                                                  | FDR Q-Val | Fold Enrichment | Foreground Regions | Background Regions | Foreground Gene Hits |
|----------------------------------------------------------------------------|-----------|-----------------|--------------------|--------------------|----------------------|
| regulation of transcription                                                | 2.33E-39  | 2.04            | 386                | 28113              | 124                  |
| regulation of cellular macromolecule biosynthetic process                  | 2.91E-38  | 2.01            | 388                | 28737              | 126                  |
| regulation of macromolecule biosynthetic process                           | 2.00E-38  | 2.01            | 388                | 28741              | 126                  |
| regulation of cellular biosynthetic process                                | 2.91E-38  | 2.00            | 388                | 28826              | 126                  |
| regulation of biosynthetic process                                         | 2.80E-38  | 2.00            | 388                | 28850              | 126                  |
| regulation of transcription, DNA-dependent                                 | 2.87E-32  | 2.08            | 308                | 22073              | 99                   |
| regulation of RNA metabolic process                                        | 3.10E-32  | 2.07            | 309                | 22198              | 100                  |
| positive regulation of fibroblast growth factor receptor signaling pathway | 1.12E-25  | 9.58            | 43                 | 668                | 3                    |
| transcription                                                              | 1.09E-21  | 2.13            | 205                | 14349              | 59                   |
| positive regulation of cell communication                                  | 4.61E-21  | 7.03            | 44                 | 932                | 4                    |
| positive regulation of signaling pathway                                   | 4.61E-21  | 7.03            | 44                 | 932                | 4                    |
| regulation of fibroblast growth factor receptor signaling pathway          | 1.28E-20  | 7.03            | 43                 | 910                | 3                    |
| embryonic limb morphogenesis                                               | 6.40E-20  | 6.05            | 47                 | 1157               | 6                    |
| embryonic forelimb morphogenesis                                           | 6.40E-20  | 6.05            | 47                 | 1157               | 6                    |
| embryonic pectoral fin morphogenesis                                       | 6.40E-20  | 6.05            | 47                 | 1157               | 6                    |
| embryonic appendage morphogenesis                                          | 1.22E-19  | 5.93            | 47                 | 1179               | 6                    |
| limb morphogenesis                                                         | 6.91E-19  | 5.67            | 47                 | 1234               | 6                    |
| forelimb morphogenesis                                                     | 6.91E-19  | 5.67            | 47                 | 1234               | 6                    |
| pectoral fin morphogenesis                                                 | 6.91E-19  | 5.67            | 47                 | 1234               | 6                    |
| limb development                                                           | 6.91E-19  | 5.67            | 47                 | 1234               | 6                    |



**Supplementary Table 6.11** Top 20 statistically significant (FDR q-value < 0.05) GO molecular function terms (CNEs lost in seahorse).

| Term Name                                                   | FDR Q-Val   | Fold Enrichment | Foreground Regions | Background Regions | Foreground Gene Hits |
|-------------------------------------------------------------|-------------|-----------------|--------------------|--------------------|----------------------|
| DNA binding                                                 | 5.17E-37    | 2.03            | 371                | 27253              | 119                  |
| nucleic acid binding transcription factor activity          | 1.59E-35    | 2.25            | 290                | 19206              | 91                   |
| sequence-specific DNA binding transcription factor activity | 1.59E-35    | 2.25            | 290                | 19206              | 91                   |
| sequence-specific DNA binding                               | 8.38E-30    | 2.25            | 246                | 16293              | 76                   |
| transcription regulator activity                            | 1.15E-16    | 2.06            | 176                | 12747              | 58                   |
| transcription activator activity                            | 4.60E-08    | 4.65            | 26                 | 832                | 5                    |
| steroid hormone receptor activity                           | 2.35512E-06 | 2.55            | 47                 | 2744               | 12                   |
| ligand-dependent nuclear receptor activity                  | 2.35512E-06 | 2.55            | 47                 | 2744               | 12                   |
| O-acetyltransferase activity                                | 2.06527E-06 | 24.81           | 7                  | 42                 | 2                    |
| thymidylate kinase activity                                 | 3.83767E-05 | 10.39           | 9                  | 129                | 1                    |
| nucleotide receptor activity, G-protein coupled             | 0.000113763 | 5.61            | 13                 | 345                | 1                    |
| purinergic nucleotide receptor activity, G-protein coupled  | 0.000113763 | 5.61            | 13                 | 345                | 1                    |
| purinergic nucleotide receptor activity                     | 0.000219692 | 5.22            | 13                 | 371                | 1                    |
| nucleotide receptor activity                                | 0.000219692 | 5.22            | 13                 | 371                | 1                    |
| choline O-acetyltransferase activity                        | 0.000978391 | 63.80           | 3                  | 7                  | 1                    |
| purinergic receptor activity                                | 0.000934493 | 4.46            | 13                 | 434                | 1                    |
| histone methyltransferase activity (H4-R3 specific)         | 0.002937371 | 7.89            | 7                  | 132                | 1                    |
| histone methyltransferase activity (H3-R2 specific)         | 0.002937371 | 7.89            | 7                  | 132                | 1                    |
| histone methyltransferase activity (H2A-R3 specific)        | 0.002937371 | 7.89            | 7                  | 132                | 1                    |
| histone-arginine N-methyltransferase activity               | 0.003090609 | 7.66            | 7                  | 136                | 1                    |

**Supplementary Table 6.12** Expression pattern of zebrafish CNEs lost in seahorse.

| S. No. | CNE     | Length | Location                        | Expression in F1 embryos                                     |
|--------|---------|--------|---------------------------------|--------------------------------------------------------------|
| 1      | #4452   | 186 bp | upstream of <i>shox</i>         | no expression                                                |
| 2      | #6440   | 106 bp | upstream of <i>sall1a</i>       | no expression                                                |
| 3      | #6560   | 194 bp | downstream of <i>sall1a</i>     | forebrain, midbrain, hindbrain, floor plate and otic vesicle |
| 4      | #6500   | 263 bp | upstream of <i>lmo1</i>         | forebrain, midbrain, hindbrain and spinal cord               |
| 5      | #hoxc-1 | 272 bp | <i>hoxc4a-hoxc3a</i> intergenic | spinal cord                                                  |
| 6      | #hoxd-1 | 194 bp | <i>atp5g3a-lnpa</i> intergenic  | melanocyte, heart and lens                                   |
| 7      | #hoxd-2 | 236 bp | <i>atp5g3a-lnpa</i> intergenic  | no expression                                                |

Four longest CNEs (#1 to #4) predicted by whole-genome comparisons and three three CNEs (#5 to #7) predicted by Hox loci comparisons were selected for enhancer assay in zebrafish. The positive CNEs generally seem to recapitulate part of the expression domains of their neighboring genes in zebrafish as described below: CNE #6560 is located downstream of *sall1a* which is known to express in the forebrain, midbrain, hindbrain and the otic vesicle besides other tissues (<http://zfin.org/action/quicksearch/gene-expression/ZDB-GENE-020228-2>). CNE #6500 is located upstream of *lmo1* which expresses in the forebrain, midbrain, hindbrain and spinal cord besides other regions (<http://zfin.org/action/quicksearch/gene-expression/ZDB-GENE-021115-6>). CNE #hoxc-1 is in the intergenic region of *hoxc4a* and *hoxc3a*. *hoxc4a* is known to express in the spinal cord besides several other tissues (<http://zfin.org/action/quicksearch/gene-expression/ZDB-GENE-990415-112>). CNE #hoxd-1 is flanked by *atp5g3a* and *lnpa*. *lnpa* is known to express in the mesenchyme pectoral fin. However, the expression pattern of zebrafish *atp5g3a* is not known. Thus, it is unclear whether the expression pattern of CNE #hoxd-1 resembles that of any of its neighboring genes.

## 7. Hox gene evolution

### Hox genes in *H. comes*

Hox genes encode homeodomain-containing transcription factors that define segmental identities along the anterior-posterior axis of developing metazoan embryos<sup>63</sup>. In vertebrates, Hox genes are also critical for antero-posterior as well as proximal-distal patterning of limbs<sup>64</sup>. As such, changes in Hox gene complement, sequence and regulation have been frequently suggested to underlie evolutionary transitions. The *H. comes* genome contains seven Hox clusters like most other teleost fishes, with a gene complement of 45 Hox genes similar to that of fugu (Supplementary Fig. 7.1). We noted that all *hoxc3* gene copies have been independently lost in seahorse, fugu and the European eel (which has both a *Hoxca* and a *Hoxcb* cluster but lacks both *hoxc3a* and *hoxc3b* genes) while all other teleosts such as the African butterflyfish (*Pantodon buchholzi*), zebrafish, medaka, stickleback and Nile tilapia have retained *hoxc3a* (Supplementary Fig. 7.1).

### Selection pressure on Hox genes

Using the branch-site model implemented in the codeml program of PAML package<sup>42</sup>, we identified positive Darwinian selection signals in three Hox genes: *Hoxa11b*, *Hoxa2b*, and *Hoxa4a* (P-value < 0.05, Supplementary Table 7.1). Interestingly, the adaptive changes in the *Hoxa11* gene were shown to play an essential role for the evolution of pregnancy in mammals, which is able to up-regulate the expression of prolactin endometrial cells<sup>65</sup>. By comparing the sequences of *Hoxa11b* in seahorse and other species, we identified two amino-acid sites in seahorse were under positive selection in the first exon of *Hoxa11b* (P-value > 0.98, BEB test<sup>66</sup>, Supplementary Table 7.1). Both sites were validated in *H. comes* using Sanger sequencing and the assembled RNA-seq reads from *Hippocampus erectus* (data not shown). To check whether the positively selected sites in seahorse *Hoxa11b* overlap with the sites that were under positive selection at the ancestral branch of placental mammals<sup>65</sup>, we collected the *HoxA11* sequences that cover a wide range of mammals (placental and non-placental), teleost fishes, and shark, reconstructed the ancestral sequences for all the nodes using PAML, and found the two positively selected sites in seahorse don't overlap with the ten positively selected sites at the ancestral branch of placental mammals. *HoxA2a*, a member of *HoxA2* paralog group, plays an important role in the facial development of vertebrates<sup>67,68</sup>. *HoxA2* is believed to pattern the second arch skeleton by suppressing transformation from neural crest cells to skeleton cell<sup>67,69</sup>; therefore, chondrogenesis develops only in areas that lack of the expression of *HoxA2*<sup>70</sup>. Furthermore, Donaldson and colleagues found that *HoxA2* controls Wnt- $\beta$ -catenin-signaling pathway during second branchial arch development in mouse using Chip-seq<sup>71</sup> technology. Knockout experiments show that *HoxA4* leads to homeotic transformation of cervical vertebrae, especially from the third to the seventh cervical vertebrae in mouse<sup>72</sup>. Abnormal pectoral girdle and rib formation were also

observed in mouse with homozygous knock-out alleles<sup>72</sup>.

**Supplementary Table 7.1** Seahorse Hox genes under selection.

| Gene name | No. fish species compared | ωf       | LTR      | P-value | Positively selected sites |
|-----------|---------------------------|----------|----------|---------|---------------------------|
| HoxA1a    | 9                         | 7.6164   | 0.159072 | ns      | NA                        |
| HoxA2a    | 8                         | 9.7744   | 1.843094 | ns      | NA                        |
| HoxA2b    | 8                         | 2.94085  | 4.054444 | <0.05   | NA                        |
| HoxA3a    | 8                         | 10.0568  | 2.831354 | ns      | NA                        |
| HoxA4a    | 9                         | 999      | 4.312072 | <0.05   | 63 G*<br>199 S*           |
| HoxA5a    | 9                         | 1.0000   | 0        | ns      | NA                        |
| HoxA9a    | 9                         | 1.0000   | 0        | ns      | NA                        |
| HoxA9b    | 9                         | 4.4071   | 0.372238 | ns      | NA                        |
| HoxA10a   | 8                         | 998.9023 | 3.530592 | ns      | NA                        |
| HoxA10b   | 9                         | 4.4886   | 3.081746 | ns      | NA                        |
| HoxA11a   | 9                         | 3.8670   | 0.446864 | ns      | NA                        |
| HoxA11b   | 8                         | 512.5814 | 4.532186 | <0.05   | 80 D*<br>149 Q*           |
| HoxA13a   | 9                         | 1.0000   | 0        | ns      | NA                        |
| HoxA13b   | 9                         | 1.0000   | 0        | ns      | NA                        |
| HoxB1a    | 9                         | 1.0000   | 0        | ns      | NA                        |
| HoxB1b    | 9                         | 27.4103  | 1.047934 | ns      | NA                        |
| HoxB2a    | 9                         | 1.8379   | 0.076254 | ns      | NA                        |
| HoxB3a    | 9                         | 1.0000   | 0        | ns      | NA                        |
| HoxB3b    | 7                         | 279.4952 | 3.458184 | ns      | NA                        |
| HoxB4a    | 9                         | 1.0000   | 0        | ns      | NA                        |
| HoxB5a    | 9                         | 1.2256   | 0.06865  | ns      | NA                        |
| HoxB5b    | 8                         | 1.0000   | 0        | ns      | NA                        |
| HoxB6a    | 7                         | 1.0000   | 0        | ns      | NA                        |
| HoxB8a    | 7                         | 7.4851   | 1.113974 | ns      | NA                        |
| HoxB9a    | 7                         | 1.0000   | 0        | ns      | NA                        |
| HoxB13a   | 9                         | 1.0939   | 0.002668 | ns      | NA                        |
| HoxC4a    | 9                         | 1.2516   | 0.03995  | ns      | NA                        |
| HoxC5a    | 9                         | 1.0000   | 0        | ns      | NA                        |
| HoxC6a    | 9                         | 51.2794  | 0.030106 | ns      | NA                        |

|         |   |          |          |    |    |
|---------|---|----------|----------|----|----|
| HoxC8a  | 9 | 15.7861  | 2.112044 | ns | NA |
| HoxC9a  | 9 | 5.9442   | 0        | ns | NA |
| HoxC10a | 9 | 1.0458   | 0.00267  | ns | NA |
| HoxC11a | 9 | 110.9551 | 3.658492 | ns | NA |
| HoxC12a | 9 | 1.0000   | 0        | ns | NA |
| HoxC13a | 9 | 1.0000   | 0        | ns | NA |
| HoxD3a  | 8 | 2.5809   | 1.135544 | ns | NA |
| HoxD4a  | 9 | 4.4886   | 3.081746 | ns | NA |
| HoxD4b  | 7 | 1.0000   | 0        | ns | NA |
| HoxD9a  | 9 | 104.6913 | 3.080332 | ns | NA |
| HoxD9b  | 7 | 1.0000   | 0        | ns | NA |
| HoxD10a | 9 | 10.5715  | 0.48354  | ns | NA |
| HoxD11a | 9 | 1.5317   | 0.102358 | ns | NA |
| HoxD11b | 3 | 1.0000   | 0        | ns | NA |
| HoxD12a | 9 | 2.0472   | 0.072718 | ns | NA |

LTR: likelihood ratio test,  $\omega$ : selection pressure on foreground branch. P-value > 0.05 were listed as non-significant (ns) in the table. NA indicates no significantly positive selected sites were identified by Codeml. \* indicates P-value for positively selected sites is greater than 0.95.

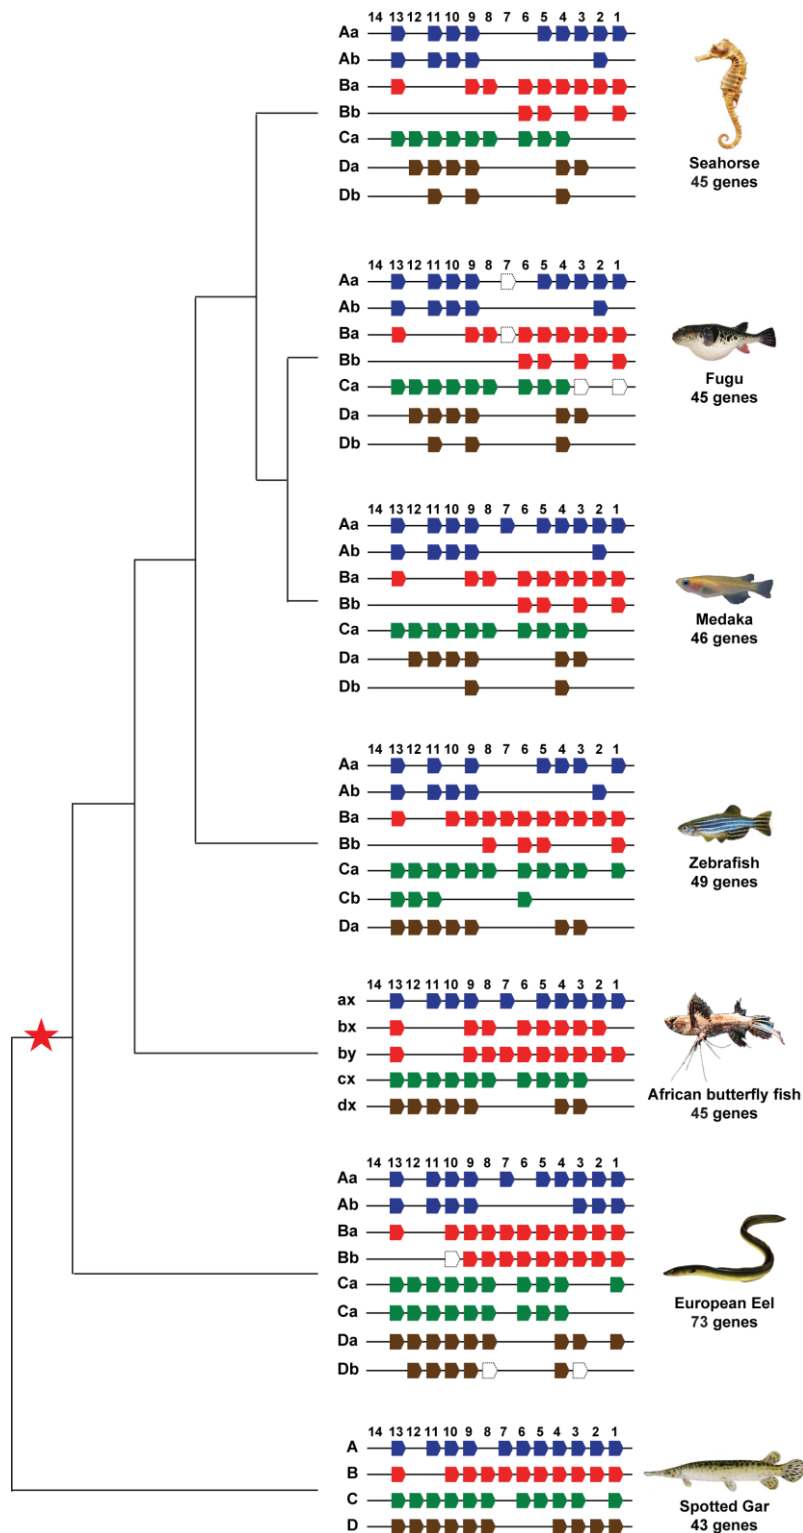

**Supplementary Figure 7.1 | Hox gene clusters in tiger tail seahorse (*H. comes*) and other ray-finned fishes.** Hox genes are shown as block arrows with the direction of the arrow representing the transcriptional orientation. Pseudogenes are shown as white dotted blocks. The red star represents the teleost-specific whole genome duplication event.

## 8. OR (olfactory receptors) genes in seahorse

The sense of smell is mediated by the detection of chemical odors by ORs (olfactory receptors). OR genes belong to the largest group of G protein-coupled receptors (GPCRs). Ligands for the rhodopsin-like GPCRs include photons, peptide hormones, odorants, etc. The functional OR genes identified can be separated into 2 major groups, type 1 and type 2. Type 1 genes contain groups  $\alpha$ ,  $\beta$ ,  $\gamma$ ,  $\delta$ ,  $\epsilon$ ,  $\zeta$ , and type 2 genes contain five groups that were named  $\eta$ ,  $\theta 1$ ,  $\theta 2$ ,  $\kappa$ , and  $\lambda$ <sup>73</sup>. Group  $\alpha$  and  $\gamma$  are responsible for airborne odorants, group  $\delta$ ,  $\epsilon$ ,  $\zeta$ ,  $\eta$  are responsible for water-soluble odorants, and group  $\beta$  may function in both airborne and water-soluble odorants<sup>74</sup>.

We downloaded 1,417 protein sequences of classified OR gene family from NCBI and mapped to the seahorse genome using Tblastn with “E-value  $\leq 1e-10$ ” and “alignment rate  $\geq 0.5$ ”. Solar (in-house software, version 0.9.6) was used to conjoin high-scoring segment pairs (HSPs) between each pair of protein mapping result. We did a filtered and only retained the results which were with alignment rate more than 70% and mapping identity more than 40%. Then, the protein sequences were placed on the genome using Genewise and extended 280bp upstream and downstream to define integrated gene models. Finally, we identified 26 OR genes in the seahorse genome. For phylogenetic analysis, protein sequences were aligned using MUSCLE and a JTT+gamma model was used in a maximum-likelihood analysis using PhyML to construct a phylogenetic tree.

In comparison to the OR repertoire (ranging from 60 to 169) of other teleost fishes, we only identified 26 OR genes in seahorse genome<sup>73,75</sup>. Most of the seahorse OR genes (18 genes) belong to the ‘delta’ group, which are involved in the perception of water-borne odorants<sup>74</sup>. The phylogenetic analysis of OR genes suggests that the lowest number of OR genes may result in either lack of lineage-specific expansion or massive gene loss in seahorse. These findings indicate that seahorse may rely less on sense of smell to find food or mating compared to other teleost fishes. In the closely related pipefish (*Syngnathus typhle*), smell alone was not a sufficient stimulus to discriminate between sexes<sup>76</sup>.

## 9. Loss of *tbx4* in seahorse and generation of a *tbx4* mutant zebrafish line

### 9.1 Evidence for loss of *tbx4* in seahorse

The synteny analysis of *tbx2b-tbx4-brip1* region of seahorse, stickleback, fugu, and zebrafish using vista shows that *tbx4* was lost in seahorse (Figure 3). To exclude the scenario that the absence of *tbx4* in the seahorse genome sequence is due to an assembly error, we first validated the micro-synteny region of *tbx2b-tbx4-brip1* region in seahorse using a PCR-based genomic walk strategy. Briefly, 28 primer pairs (Supplementary Table 9.1) were designed for overlapping amplicons to ‘walk’ from the end of *tbx2b* to the start of *brip1*. Amplicon size and partial end sequencing of these products did not indicate any anomalies in the assembly of the seahorse *tbx4* ‘ghost locus’.

In addition, we carried out the following analyses:

1. searched the *H. comes* genome (TblastN) using *tbx4* protein from zebrafish and Nile tilapia and were unable to find a *tbx4* gene.
2. next searched *H. comes* genome using only the domain sequence of the *tbx4* protein but were unable to find a *tbx4* gene.
3. searched *H. comes* and *Hippocampus erectus* transcriptome data for *tbx4* (TblastN) using *tbx4* protein from zebrafish and Nile tilapia but were unable to find any matching transcript.
4. searched *H. comes* and *Hippocampus erectus* transcriptome data with the domain sequence as well and did not find any remnant of a *tbx4* gene.
5. predicted CNEs in the ‘ghost’ *tbx4* locus of seahorse using the fugu *tbx4* locus as the reference (base) (Supplementary Figure 9.3). We used the CNEs present in the other fish genome loci (that were absent in seahorse) to search the seahorse genome to rule out the possibility that they may be present elsewhere in the genome. We were unable to find any of these CNEs in the seahorse genome.

Finally, we conducted degenerate PCR experiments to ascertain if the *tbx4* gene is missing in seahorses. Using a combination of four forward and two reverse primers (Supplementary Table 9.1), we checked for the presence of *tbx4* in seven species of seahorse (genus *Hippocampus*, including *H. comes* and *H. erectus*), five species of pipefish (four from the genus *Syngnathus* and one species of *Corythoichthys*) (all from the family Syngnathidae that lack pelvic fins); ghost pipefish (*Solenostomus*) and the trumpetfish (Aulostomidae) which are closely related to the Syngnathidae but possess pelvic fins; and five other teleost species that possess pelvic fins (Supplementary Figures 9.1 and 9.2). While pelvic fin-containing teleost fishes were positive for the degenerate PCR, there was no PCR product in seahorses and pipefish (Supplementary Figures 9.2, upper panel). Sequencing of the PCR products from the pelvic fin-containing species confirmed that the amplified product was indeed from *tbx4* (Supplementary Figures 9.2, lower panel).



Together, these different lines of evidence strongly suggest that the seahorse genome does not possess the *tbx4* gene. This gene was most likely lost in the common ancestor of all syngnathids.

**Supplementary Table 9.1:** Degenerate PCR primer sequences for *tbx4* showing the forward (FW) and reverse (RV) primers used.

| Primer name | Sequence                |
|-------------|-------------------------|
| FW1         | GAGGATGTTTCCTAGCTACAAGG |
| FW2         | GAGGATGTTTCCTAGCTACAA   |
| FW3         | GAGRATGTTTCCWAGCTACAARG |
| FW4         | GAGRATGTTTCCWAGCTACAA   |
| RV1         | TCRCWGAAYTTGTADCGRTGGTC |
| RV2         | TCACAGAAYTTGTADCGGTGGTC |

|                                 | RV1 |     |     |     | RV2 |     |     |     |
|---------------------------------|-----|-----|-----|-----|-----|-----|-----|-----|
|                                 | FW1 | FW2 | FW3 | FW4 | FW1 | FW2 | FW3 | FW4 |
| <i>Astatotilapia burtoni</i>    | 1   | 1   | 1   | 1   | 1   | 1   | 1   | 1   |
| <i>Xenentodon cancila</i>       | 1   | 1   | 1   | 1   | 1   | 1   | 1   | 1   |
| <i>Aulostomus chinensis</i>     | 1   | 1   | 1   | 0   | 1   | 1   | 1   | 1   |
| <i>Antennarius striatus</i>     | 1   | 1   | 1   | 1   | 1   | 1   | 1   | 1   |
| <i>Synchiropus splendidus</i>   | 0   | 1   | 0   | 1   | 0   | 1   | 0   | 1   |
| <i>Amphiprion percula</i>       | 1   | 1   | 1   | 1   | 1   | 1   | 1   | 1   |
| <i>Solenostomus paradoxus</i>   | 1   | 1   | 0   | 1   | 0   | 1   | 1   | 1   |
| <i>Syngnathus rostellatus</i>   | 0   | 0   | 0   | 0   | 0   | 0   | 0   | 0   |
| <i>Syngnathus biocellatus</i>   | 0   | 0   | 0   | 0   | 0   | 0   | 0   | 0   |
| <i>Syngnathus louisianae</i>    | 0   | 0   | 0   | 0   | 0   | 0   | 0   | 0   |
| <i>Syngnathus floridae</i>      | 0   | 0   | 0   | 0   | 0   | 0   | 0   | 0   |
| <i>Corythoichthys spec.</i>     | 0   | 0   | 0   | 0   | 0   | 0   | 0   | 0   |
| <i>Hippocampus zoetra</i>       | 0   | 0   | 0   | 0   | 0   | 0   | 0   | 0   |
| <i>Hippocampus comes</i>        | 0   | 0   | 0   | 0   | 0   | 0   | 0   | 0   |
| <i>Hippocampus subelongatus</i> | 0   | 0   | 0   | 0   | 0   | 0   | 0   | 0   |
| <i>Hippocampus erectus</i>      | 0   | 0   | 0   | 0   | 0   | 0   | 0   | 0   |
| <i>Hippocampus kuda</i>         | 0   | 0   | 0   | 0   | 0   | 0   | 0   | 0   |
| <i>Hippocampus abdominalis</i>  | 0   | 0   | 0   | 0   | 0   | 0   | 0   | 0   |
| <i>Hippocampus barbouri</i>     | 0   | 0   | 0   | 0   | 0   | 0   | 0   | 0   |

**Supplementary Figure 9.1:** Results of the degenerate PCR experiments with the complete set of species and the primer combinations used (1: PCR positive; 0: PCR negative)

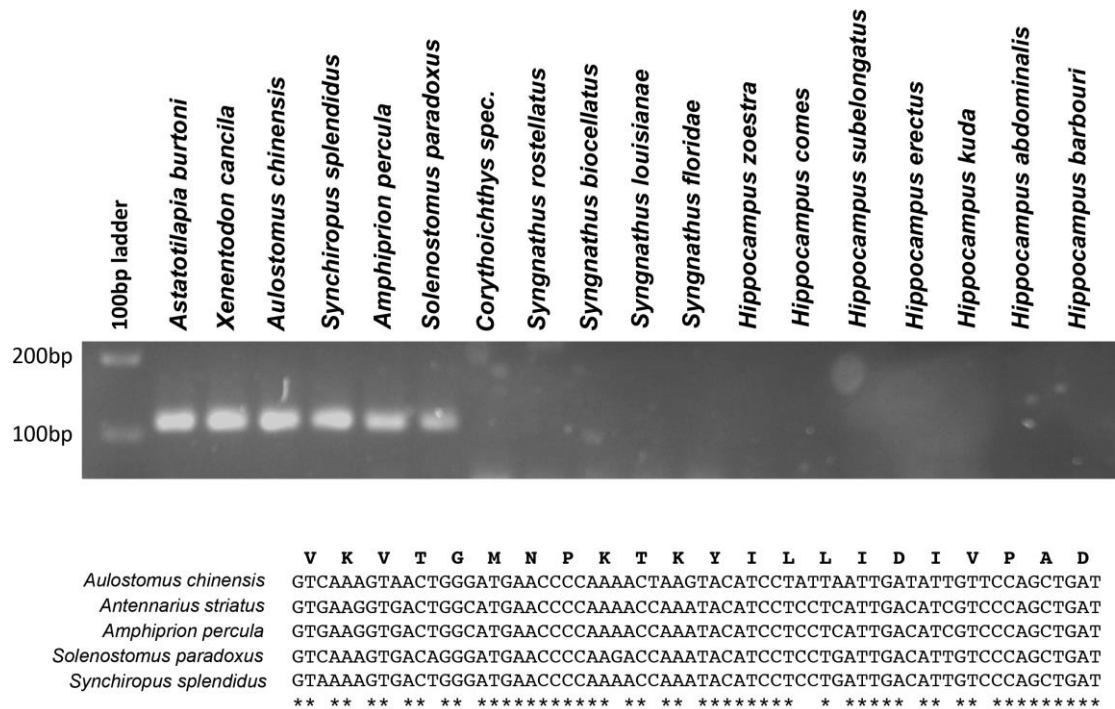

**Supplementary Figure 9.2:** *tbx4* degenerate PCR results. Primers FW2 and RV1 which amplify a portion of *tbx4* exon 3 were used. These primers amplify the *tbx4* fragment in teleost fishes [*Astatotilapia burtoni* (cichlid fish), *Xenentodon cancila* (needlefish), *Aulostomus chinensis* (trumpetfish), *Synchiropus splendidus* (Mandarin fish), *Amphiprion percula* (clownfish), *Solenostomus paradoxus* (ghost pipefish)] that possess pelvic fins but not in pipefish (*Corythoichthys* and *Syngnathus* species) and seahorses (*Hippocampus* species) that lack pelvic fins.

## 9.2 Analysis of CNEs associated with the seahorse *tbx4* ghost locus

Alignment of the *tbx2b-brip1* region from selected vertebrates using LAGAN (Supplementary Figure 9.3) showed that the seahorse '*tbx4*' locus has lost most CNEs that are normally found in this locus in other teleosts (fugu, tilapia, medaka and stickleback), spotted gar and coelacanth (light green bars). Five CNEs usually located between *tbx2b* and *brip1* are, however, conserved in the seahorse locus (yellow bars) and may correspond to long-range regulatory elements involved in the regulation of *tbx2b* or another neighboring gene. The genomic region between *tbx4* and *brip1* is known to contain a hind limb-specific enhancer that is conserved as a CNE in tetrapods and teleosts (HLEB)<sup>77,78</sup> (blue bar). In seahorse, we cannot identify this region and it has likely been lost together with *tbx4*.

The presence of the five conserved CNEs (yellow bars) mark the original position of *tbx4* to a 14 kb region (shown as a dashed line), that is similar in size to the *tbx4* genomic region in other teleosts. Translated Blast searches using conserved domain sequences were unable to pick up any remnants of the *tbx4* coding regions. The

complete loss of conserved motifs is compatible with the loss of a functional *tbx4* gene in the seahorse.

Conserved noncoding elements from *fugu* that are present in other teleosts but not in the seahorse *tbx4* ‘ghost locus’ were BlastN searched against the seahorse genome to validate their genuine absence and exclude the possibility that they may have been erroneously assembled into another scaffold. We were unable to detect any such CNE in the seahorse genome.

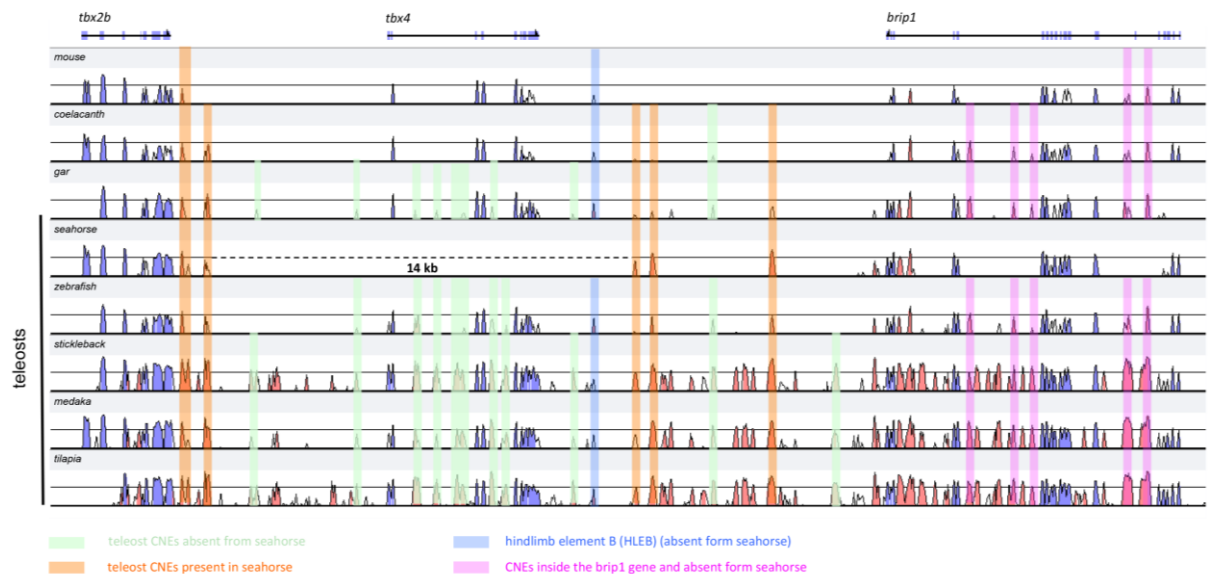

**Supplementary Figure 9.3 VISTA plot of the *tbx2-tbx4-brip1* locus in seahorse, tilapia, medaka, stickleback, zebrafish, spotted gar, coelacanth and mouse.** *Fugu* is the reference sequence. Conserved non-coding elements (CNEs) that are maintained in seahorse are indicated using orange bars, CNEs absent from seahorse are indicated with green bars, the hindlimb enhancer B (HLEB)<sup>78</sup> is indicated with a blue bar, CNEs present in the intronic regions of *brip1* but absent from seahorse are indicated with lilac bars. The seahorse syntenic region shows not only loss of *tbx4* coding regions but also of teleost CNEs (green bars). Five CNEs still retained in seahorse (orange bars) mark a 14 kb region formerly containing the *tbx4* gene (indicated with a dashed line). In addition fish/vertebrate specific CNEs present in in the *brip1* intronic region have been lost from seahorse, indicative of a further regulatory erosion of the *tbx4* regulatory landscape.

### 9.3 Generation of mutant *tbx4* zebrafish and phenotypic analysis

To investigate the phenotypic consequences of *tbx4* loss in a teleost, we used a CRISPR/Cas9 strategy to generate a *tbx4* mutant zebrafish line. Two guide RNAs (gRNAs) were designed targeting zebrafish *tbx4* in the 5' end of the sequence that is before or inside the DNA-binding TBOX domain (Supplementary Figure 9.4). gRNAs were cloned using synthesized oligos into the pT7gRNA vector as described in<sup>79</sup>

(oligos sequences given in [Supplementary Table 9.2](#)). gRNAs were synthesized from this vector using linearization with BamH1-HF (NEB R3136T), transcribed using the MEGAscript T7 Transcription Kit (Thermo Fischer Scientific AM1334) and purified using the mirVana miRNA isolation kit (Thermo Fischer Scientific AM1560). Cas9 mRNA was synthesized from the Cs2+Cas9 vector using the mMessage mMachine Sp6 Transcription Kit (Thermo Fischer Scientific AM1340) and purified using the RNA cleanup protocol from the RNaseasy mini kit (Qiagen 74104).

Zebrafish from a wild caught strain were injected at the one cell stage with ~50ng gRNA and ~90 ng Cas9 RNA. These F0 fish were raised to maturity and genotyped using fin clipping, DNA isolation and PCR spanning the target site (genotyping primers given in [Supplementary Table 9.2](#)). PCR products were analyzed for mutations as described<sup>79</sup> using T7 endonuclease (NEB M0302L). Mosaic mutant F0 fish were outcrossed to AB wildtype fish and embryos were batch genotyped for transmission of the mutation using PCR and T7 endonuclease. Mutant PCR products were cloned into the pGEMT vector (Promega A3600) and sequenced to identify carrier fish transmitting a frameshift mutation. These carrier fish were crossed again to AB WT and the resulting F1 fish were raised to maturity. The F1 were phenotyped using fin clipping, DNA isolation, PCR, T7 endonuclease to identify heterozygous mutant fish followed by cloning and sequencing of the mutant PCR products to validate presence of the frameshift allele. The CRISPR/Cas9 mutation strategy is schematically shown in [Extended Data Fig.5](#).

In the F0 mutant *tbx4* fish we observed pelvic fin loss at low frequency gRNA#1 gave 3/42 fish with either double or single sided pelvic fin loss and 1/34 had single sided pelvic fin loss for gRNA#2 ([Extended Data Fig.5](#)). We observed mutant allele transmission for both gRNA#1 and gRNA#2 but failed to identify a deletion leading to a frameshift mutation for gRNA#2 so no stable line was generated for this CRISPR. For gRNA#1 we identified several frameshift mutants, one of which was further analyzed. This mutant has a deletion/replacement mutation in which 8 nucleotides are replaced by 3 nucleotides, leading to an effective 5 bp deletion and the introduction of a frameshift mutation ([Extended Data Fig.5](#)). This mutation introduces a downstream STOP codon leading to a severely truncated protein lacking the DNA binding domain ([Supplementary Figure 9.4 and 9.5](#)). The mutant line is maintained on an AB WT background. The phenotype shown for the homozygote mutant in the main text is a representative F3 (one out of five homozygote) animal.

The *tbx4* mutant generated by us differs from two recently reported mutants by Don et al.<sup>80</sup>. One natural occurring mutant has an inactivation of the nuclear localization signal, while the other contains a TALEN induced mutation and has a premature stop codon at codon position 164. The *tbx4* mutant generated by us is predicted to retain 17 aa of the original *tbx4* coding sequence followed by 4 aa from out of frame translation

and hence results in a 21 aa peptide. As no part of the *tbox* domain is translated we infer that the chances for a dominant negative effect of a partial protein can virtually be ruled out for our mutant and our mutant is a true null mutation without confounding influences from partially translated functional domains.

In addition to the absence of pelvic fins and the pelvic girdle (as also described by Don et al.<sup>80</sup>) we observe abnormalities in the musculature of the ventral body wall in adult *tbx4* homozygous mutant fish (Supplementary Figure 9.6 a, b). Externally this phenotype is apparent as absence of the musculature normally associated with the pelvic girdle (PvFm in Supplementary Figure 9.6 a), but also more anteriorly where a clearly defined *musculus infracarinalis anterior*<sup>80,81</sup> that typically runs along the ventral midline, is absent. In contrast to wildtype fish, mutant fish show a somewhat translucent groove along their belly where the viscera shine through (Supplementary Figure 9.6 a). Sectioning shows that indeed these mutant fish have an opening in their ventral body wall musculature and either absence or very strong morphological abnormality of the *m. infracarinalis anterior* (Supplementary Figure 9.6 b).

We investigated expression of *tbx4* in the developing cichlid fish *Astatotilapia burtoni* where the embryonal stages during which body wall formation takes place are tractable using *in situ* hybridization (Supplementary Figure 9.6 c). *tbx4* is expressed in a domain much wider than the pelvic fins and is also strongly expressed in the muscle cells that will migrate to form the ventral midline. This expression domain is consistent with the observed phenotypic defects in the zebrafish mutant.

How this additional *tbx4* phenotype relates to the absence of *tbx4* in *Hippocampus* or pelvic fin loss in general is not directly clear, but we can make two interesting observations. First, despite the loss of their pelvic fin in pufferfish and eels, these species still maintain a functional *tbx4* copy in their genome, suggesting the presence of a pleiotropic constraint on loss of this gene.

We are not aware of any studies describing the muscular organization of the ventral body wall in any of these species, but it appears plausible that the altered muscular organization induced upon *tbx4* loss contributes to this constraint and explains why *tbx4* is retained in these species. Second, like all syngnathids, seahorses are covered in an armor of bony plates that may well mitigate the adverse effects of defects in body wall closure. Also, syngnathids and more specifically seahorses are known to have a highly derived hypaxial and ventral muscular system<sup>82</sup> and it is enticing to speculate that absence of *tbx4* may have contributed to its evolution.

**Supplementary Table 9.2** Primer sequences used to amplify the seahorse *tbx4* synteny region for validation of the assembly. Each amplicon overlaps with the subsequent amplicon, thereby demonstrating physical linkage of the DNA sequences.

| FW primer                  | RV primer                   |
|----------------------------|-----------------------------|
| TTGGGATGTCTTGGCTTGCAGAC    | TTTAAGCTCCCACTGTTGAAACCTC   |
| GTGCTTTTACATATAGGGTAGATC   | GCAGTTTGTGATCAGAGTTGTTG     |
| CAACAACCTCTGATCACAAACTGC   | CCTGAGACCGATTACACAAC        |
| GTTGTGTGAATCGGTCTCAGG      | CTGCTGTCCTGAAAATGCAGT       |
| ACTGCATTTTCAGGACAGCAG      | GGTTTGCCCGATAGAAACAGTAG     |
| CTACTGTTTCTATCGGGCAAACC    | CAACCCTGGAACAGTATTACAGT     |
| ACTGTAATACTGTTCCAGGGTTG    | GTGAATGCTGTCTGTTGCTAG       |
| CCTTACGCTAACTGGAGCGCTAATG  | AGCCTCACAGTCCAGAGCTGCAG     |
| CACGTCAACCAGTCAACCACCATG   | TCGAGTGCAGGACCTGATCAAC      |
| CAACACTTGACCATCAGTATTTAATC | TTGTCAGTCATTTTTGCCACTG      |
| CAGTGGCAAAAATGACTGACAA     | TTATGAGGGCGCAATCTACAATAC    |
| GTATTGTAGATTGCGCCTCATAA    | TTCCCTTCATGTTTGTCCCTGAG     |
| CTCAGGGACAAACATGAAGGAA     | GCTTTGCGTTTCATGTCTCGTA      |
| TACGAGACATGAAACGCAAAGC     | CATGCCTGAGGAAGTTACTGTG      |
| CACAGTAACTTCCTCAGGCATG     | CTCTGCACTGTGAGGCCAATG       |
| TGGTTGGTGCATTGGCCTCACAG    | TAATGCTTACAAATGAGCTCTTTCAAC |
| CATCCTCCATAGTGGAAAAGTTG    | GAGCTCTTTCAACCGGTCTCT       |
| AGAGACCGGTTGAAAGAGCTC      | TCCGACTGCAACGGACAGTTAG      |
| CTAACTGTCCGTTGCAGTCGGA     | GATGCAAGGCTTTCTCAAAGTCAAC   |
| GACGCAGTTCCAAATAACGTG      | GTCTCCGCGTCAGGTCTCTAC       |
| CAAATTACTGCCTACCTTAGTAG    | AATGAGGTGCAATTCATGGAATATC   |
| CTCTGATCAAACAGTGTGTCTG     | GATGCCTGAGCAACTAGTACGTC     |
| GACGTACTAGTTGCTCAGGCATC    | CAAGTGCATTTTTACCTTGACCTTCC  |
| CTGGTAACCAGTTCAGGGTGTAC:   | CAGCTGTTGGAACCTGGCTTGAG     |
| CTCAAGCCAAGTTCCAACAGCTG    | CTGGTTAGGATGCCTCCTGGATG     |
| CATCCAGGAGGCATCCTAACCAG    | GAGCCGTACACAATTATCACTGTG    |
| CAGAGCCTTGAGAAACTCCGT      | CCTTTGCAGAGGTGTCTCTTGTTAC   |
| GTAACAAGAGACACCTCTGCAAAGG  | TCTGAGGTCGCCCAAGATTCTCC     |

**Supplementary Table 9.2** Oligo sequences used for gRNA cloning and genotyping of the CRISPR/Cas9 induced mutations.

| oligo name            | oligo sequence            | oligo purpose  |
|-----------------------|---------------------------|----------------|
| dre-tbx4 gRNA#1 FW    | TAGGAATGACCGTTGCCAGTC     | cloning gRNA   |
| dre-tbx4 gRNA#1 RV    | AAACGACTGGGCAACGGTCATT    | cloning gRNA   |
| dre-tbx4 gRNA#1 gt FW | TCTCTTTTTGAAAGTTGTACTTCCA | genotyping PCR |
| dre-tbx4 gRNA#1 gt RV | CTGGAAGCGAGATGGCCTAG      | genotyping PCR |
| dre-tbx4 gRNA#2 FW    | TAGGGTGGACATAGAGTCTTCC    | cloning gRNA   |
| dre-tbx4 gRNA#2 RV    | AAACGGAAGACTCTATGTCCAC    | cloning gRNA   |
| dre-tbx4 gRNA#2 gt FW | ATGTCAGAGCTGCTGGAAAGCT    | genotyping PCR |
| dre-tbx4 gRNA#2 gt RV | TTGCTCACCTTTAATGCCAAAG    | genotyping PCR |

gRNA#1 target sequence: GGAATGACCGTTGCCAGTCGGG (nt 37-59)  
 gRNA#2 target sequence: CCTGGAAGACTCTATGTCCACCC (nt 391-413)

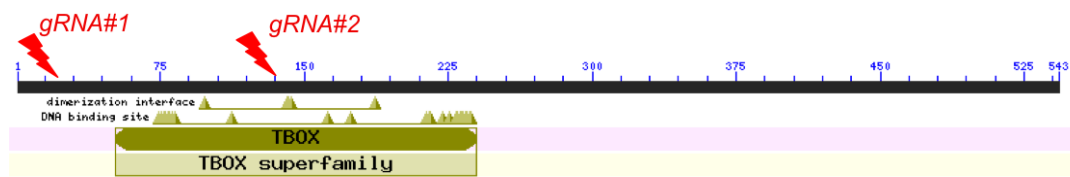

**Supplementary Figure 9.4 *Tbx4* gRNA design.** Two gRNAs were designed for target sites located in the 5' end of the *tbx4* coding sequence. gRNA#1 targets the first coding exon (exon 2) before the DNA-binding TBOX domain. gRNA#2 has its target site inside the TBOX domain in exon 5. Both gRNAs are expected to generate loss of function alleles because both target sites contain downstream out of frame STOP codons that will become functional upon -1 and -2 frameshift deletions (i.e. deletions of any number of nucleotides not divisible by 3). The position of the two gRNAs is shown on a schematic diagram of the protein sequence generated by the NCBI conserved domain database (CDD) in which the position of the TBOX domain is indicated.



|                       |                                                                 |
|-----------------------|-----------------------------------------------------------------|
| Zebrafish_TBX4        | MLQEKASVVADEGMTVAQSGGRPELASDSSHLGLFTTPSNPQNNPEPDQSIENIKVVLHDR   |
| Zebrafish_TBX4_mutant | MLQEKASVVADEGMTVAHSAS-----<br>*****;*                           |
| Zebrafish_TBX4        | ELWKKFHEAGTEMIITKAGRRMFPSYKVKVTGMNPKTRYILLTDIVPADDHRYKPCDNKW    |
| Zebrafish_TBX4_mutant | -----                                                           |
| Zebrafish_TBX4        | MVAGKAE PAMPGRLYVHPDSPATGAHWMRQLVSPQKLLKLTNNHLDPPFGHIILNSMHKYQP |
| Zebrafish_TBX4_mutant | -----                                                           |
| Zebrafish_TBX4        | RLHIVKADENNAFGSKNTAYCTHVPHETAFISVTSYQNHKITQLKIENNPFAKGRGSDE     |
| Zebrafish_TBX4_mutant | -----                                                           |
| Zebrafish_TBX4        | GDLRVSRLQGKDYPVISKNMVRQLISSHGHLGKLSAGVLSHPQVLSHYQYDSGVPLP       |
| Zebrafish_TBX4_mutant | -----                                                           |
| Zebrafish_TBX4        | NSDSQEALSNSFTSSREPSLLYHCFKHRDNPRHLELGCKRPYLDTTSSAVSEEHYFRSPP    |
| Zebrafish_TBX4_mutant | -----                                                           |
| Zebrafish_TBX4        | SYDSPLLSHPHYCNEALGSREACMYGEGEGGAVGTDDLPAAPSLNCNMWASVQPYPRYG     |
| Zebrafish_TBX4_mutant | -----                                                           |
| Zebrafish_TBX4        | MQTVEAMQYQPFTHAFNSTASAASMVSHHSPMQRPHTPPDLVTFTTQRVLPPTSSAS       |
| Zebrafish_TBX4_mutant | -----                                                           |
| Zebrafish_TBX4        | TSPSGSGHHDRAHSSLFHRKAGSPLRSQRDFTGYSTHSPTPTREPAYQYQTGLSSVGPWH    |
| Zebrafish_TBX4_mutant | -----                                                           |
| Zebrafish_TBX4        | TDS                                                             |
| Zebrafish_TBX4_mutant | ---                                                             |

**Supplementary Figure 9.5 Alignment of wildtype and mutant zebrafish TBX4 proteins:** Wildtype zebrafish TBX4 consists of 543 amino acids while the premature stop codon in the mutant allele reduces this to a predicted 21 amino acids. The mutant allele completely lacks the DNA-binding TBOX domain (highlighted in orange in the wildtype allele).

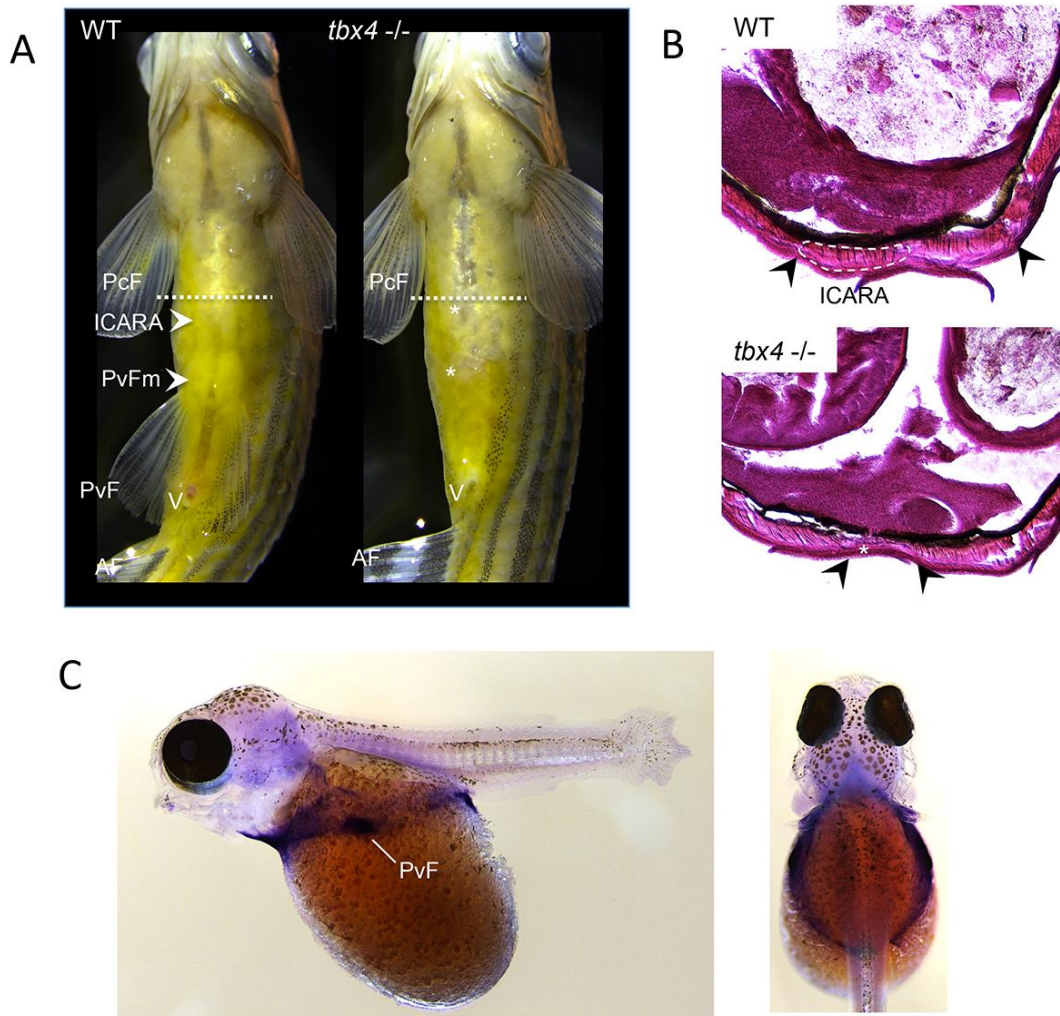

**Supplementary Figure 9.6 Ventral body wall defects in *tbx4* mutant zebrafish.** **a)** ventral view of wildtype and *tbx4* mutant fish. Wildtype fish show a distinct pattern of ventral musculature with pronounced bulges at the position of the pelvic girdle (pelvic fin musculature; PvFm) and more anteriorly the *musculus infracarinalis anterior* (ICARA). In *tbx4* mutant fish these muscles are not observed and these fish show a slightly translucent groove along their midline indicative of defects in the formation of their body wall (muscle absence indicated with asterisks). **b)** Cryosectioning (section shown approximately at the position of the dashed lines indicated in panel **a** of this figure) shows absence or strong malformation of the *musculus infracarinalis anterior* in the mutant leaving a gap in the body wall (*musculus infracarinalis anterior* indicated with a dashed outline in the wildtype). Black arrowheads indicate the ventral position of the hypaxial muscles. **c)** *In situ* hybridization for *tbx4* in embryos of a cichlid fish (*Astatotilapia burtoni*) - left panel lateral view, right panel dorsal view. *Tbx4* shows expression in a much wider domain than the pelvic fin (indicated PvF) and is also expressed in a ring around the embryo in cells that will contribute to the future ventral midline. This wider expression domain is consistent

with the phenotype observed in the *tbx4* mutant fish. Abbreviations: Pcf; pectoral fin, PvF; pelvic fin, PvFm; pelvic fin musculature, AF; anal fin, ICARA; *musculus infracarinalis anterior*.

## 10. Description and analyses of specific gene families

### 10.1 Secretory calcium-binding phosphoprotein (SCPP) gene family

The secretory calcium-binding phosphoprotein (SCPP) genes encode extracellular matrix (ECM) proteins that are involved in the formation of mineralized tissues such as bone, dentin, enamel and enameloid. SCPP genes have been identified in the genomes of bony vertebrates (Osteichthyes) but are absent in the genomes of cartilaginous fishes (Chondrichthyes) like elephant shark (*Callorhynchus milii*). These genes arose through tandem duplication of the *SPARCL1* (*SPARC-like 1*) gene that was itself derived from the *SPARC* (*secreted protein, acidic and rich in cysteine*) gene through whole-genome duplication around the time that mineralized skeleton arose in vertebrates<sup>83</sup>.

SCPP genes are divided into two groups: the acidic SCPP genes that are enriched with Asp, Glu and phospho-Ser (pSer) residues, and the proline/glutamine (P/Q)-rich SCPP genes. The acidic SCPPs regulate the mineralization of collagen scaffoldings in bone and dentin through association with calcium phosphate. In mammals, a class of acidic SCPP genes known as the SIBLING genes, comprising *DSPP*, *DMP1*, *IBSP*, *MEPE* and *SPP1* (Fig. 1), are important for bone and dentin formation. In particular, *SPP1* is predominantly expressed in bone matrix while *DSPP* is most highly expressed in dentin matrix<sup>84</sup>. In teleosts, the only SIBLING gene present is *SPP1* but there exist teleost-specific acidic SCPP genes such as *scpp1*, *scpp8* and *gps37* in zebrafish (Extended Data Fig. 3). Knockout of zebrafish *SPP1* results in significant reduction of dermal and endochondral bone formation in embryos<sup>85</sup>.

The P/Q-rich SCPPs are primarily involved in enamel formation. During the secretory stage of enamel formation, P/Q-rich enamel matrix protein (EMP) genes (*AMEL*, *AMBN* and *ENAM*) are expressed in ameloblasts and the proteins are secreted into the ECM. Mammals have EMP genes *AMEL*, *AMBN* and *ENAM*, the hypermineralization genes *ODAM*, *AMTN* and *SCPPPQ1* and a whole host of milk casein and salivary protein P/Q-rich SCPP genes. In teleost fishes, none of the EMP genes has been found thus far, presumably because EMPs may not be required for teleost enameloid whose formation is more similar to that of dentin than enamel. In contrast to tetrapod enamel that forms in a noncollagenous ECM deposited by ameloblasts, teleost enameloid forms in a dentin-like collagenous ECM that is deposited by both inner dental epithelial cells and odontoblasts<sup>86</sup>. To achieve this, teleost fishes use *SCPP2* (the orthologue of tetrapod *ODAM*) and a set of teleost-specific P/Q-rich SCPP genes. For example, in zebrafish, *scpp5* is expressed strongly in both inner dental epithelial cells and odontoblasts when the enameloid and dentin matrix are being deposited, suggesting that it is involved in enameloid and dentin matrix formation. In addition, zebrafish *scpp2* and *scpp9* are expressed strongly in only the inner dental epithelial cells at the maturation stage of enameloid after the enameloid has been fully

mineralized, pointing to the role of *scpp2* and *scpp9* as hypermineralization genes<sup>87</sup>.

The seahorse contains only two SCPP genes – the acidic *SCPP1* and *SPP1* (Extended Data Fig. 3). Full-length transcripts for both genes are found in the combined tissue transcriptome of *Hippocampus erectus*. The seahorse *SCPP1* locus contains a pseudogene for the P/Q-rich *SCPP5* gene which is represented by only three exons, despite the fact that the sequence in this genomic region is gap-free. Moreover, no transcript for this gene could be found in the combined tissue transcriptome of *Hippocampus erectus*. Thus, the seahorse possesses only two acidic SCPP genes and no P/Q rich SCPP gene (Extended Data Fig. 3). Other teleosts such as fugu and zebrafish possess eight and nine P/Q-rich SCPP genes, respectively, whereas medaka contains three P/Q-rich SCPP genes.

Seahorses are toothless, a phenomenon known as edentulism. The only other teleost fishes known to lack teeth are pipefish and the adult sturgeon. Edentulism is believed to have occurred independently in several jawed vertebrate lineages<sup>88</sup>, the most notable ones being birds<sup>89</sup>, turtles and certain mammalian lineages including baleen whales, pangolins and anteaters<sup>90</sup>. In the genomes of modern birds (Neornithes), some turtles (Western painted turtle, green sea turtle and Chinese soft-shelled turtle) and some toothless mammals (nine-banded armadillo, Hoffmann's two-toed sloth, armadillo and Chinese pangolin), the enamel-specific genes, *ENAM*, *AMEL*, *AMBN*, *MMP20* and *AMTN*, and the dentin-specific gene, *DSPP*, were found to possess inactivating mutations, and were correlated with tooth loss<sup>89,91</sup>. In teleost fishes, the P/Q-rich SCPP genes perform functions analogous to these genes. Since P/Q-rich SCPP genes are critical for enamel formation and hyper-mineralization, the complete loss of such SCPP genes in seahorse might explain their lack of teeth.

## Methods

SCPP and related genes were identified in the seahorse genome and transcriptome by TBLASTN using representative proteins. Identified regions of homology were used for BLASTX searches to confirm the identity of the genomic region. Predictions were also made using *ab initio* methods such as FGENESH<sup>92</sup> when no homology was obtained by BLAST-based approaches. All predictions were checked and refined manually.

## 10.2 The evolution of astacin metalloproteinase gene family

### Phylogenetic analysis of *astacin* family

The protein sequences of the seahorse astacin family that were predicted in this study were extracted and manually curated. The protein sequences of the *astacin* family in zebrafish, medaka, stickleback, tilapia, *Tetraodon*, platy fish and spotted gar were filtered and downloaded by Biomart from Ensembl database (Ensembl Genes 82). The Biomart filtered the protein sequences which have the *astacin* protein domain (IPR001506). To avoid the gene overlapping, the longest one was chosen and the short ones which have the same gene ID were removed. The protein sequences of C6ASTs in *astacin* family which have conserved six cysteines were aligned using the online version Muscle<sup>93</sup> (<http://www.ebi.ac.uk/Tools/msa/muscle/>). The phylogeny tree was constructed using PhyML software<sup>94</sup> with the model of “WAG +gamma”. Chromosomal locations of astacin genes in the genome of these species were identified using the UCSC Genome Browser (<http://genome.ucsc.edu/>). The expression pattern of the C6AST genes in seahorse was analyzed by Heatmap. To identify the evolution of pristinacin in seahorse, we reconstructed a phylogeny tree of C6ASTs in the *astacin* family from eight teleost genomes (seahorse, zebrafish, medaka, Nile tilapia, sticklebacks, green spotted puffer, platyfish and spotted gar) (Fig. 6a). In the phylogeny tree (Supplementary Figure 10.1), there are five subfamilies clustered in this family, including Pristinacin/Astacin, Nephrosin, Choriolysin (HCE and LCE), HCE1-like and HCE2-like. Phylogenetic analysis found clustering of pristinacin genes to themselves, suggesting that the expansion is specific to the seahorse and the pipefish. In the meanwhile, *astacin* genes of platy fish also clustered together to construct one specific cluster. And these two clusters evolved independently.

### Positive selection and 3D structure of pristinacin genes in seahorse (*H. comes*)

The coding and protein sequences of the seahorse *astacin* family that were predicted in this study were extracted and manually curated. The coding and protein sequences of the *astacin* family in spotted gar, zebrafish, medaka, stickleback, tilapia, tetraodon, and platyfish were downloaded from the Ensembl database (Ensembl Genes 82). The pristinacin sequence of pipefish was extracted from transcriptome of *Syngnathus scovelli*<sup>31</sup> using tblastx method. To generate high quality alignment for further analyses, we first aligned the protein sequences of astacin family using the online version Muscle<sup>93</sup> (<http://www.ebi.ac.uk/Tools/msa/muscle/>), filtered out the poorly aligned regions and saturated sites using trimAl<sup>35</sup> version 1.4. We then aligned the coding sequences of *astacin* family using the protein alignment as a guide. The selection pressures of pristinacin genes in seahorse were examined using the branch-site model<sup>42</sup> by codeml in the PAML toolkit<sup>43</sup> (version 4.4). To avoid local optima in codeml, we specified three initial omega values in each run. In total, 78 genes of *astacin* family were included in the analysis (Supplementary



**Table 10.1**). After filtering the saturated sites and poorly aligned regions, 579 bp in the coding regions were used in the selection pressure analysis. Using the branch-site model, a significant selection signal was identified on the *pastn3* copy in seahorse. Besides, one codon (Position 45, Threonine-> Arginine, corresponding to the amino acid 126 on the un-trimmed *pastn3*) on the *pastn3* copy was positively selected (**Supplementary Table 10.2**) based on the Bayes Empirical Bayes method<sup>66</sup>. 3D structures of Patriscin proteins were modeled via the Swiss-Model homology modeling server (<http://swissmodel.expasy.org>) with the Zymogen structure of crayfish *astacin* metallopeptidase as a template. The result showed that Arg<sup>126</sup> of *pastn3* was positive selected.

### **Expression profile of patriscin genes in seahorse (*Hippocampus erectus*)**

The expression pattern of *patriscin* was examined in eight tissues of seahorse, including brain, gill, intestine, kidney, liver, muscle, brood pouch, ovary, and testis using quantitative Reverse Transcription PCR (qRT-PCR) with five biological replicates in each test. In addition, we also compared the expression of *patriscin* between different pregnant (early and late stage) with that of non-pregnant stages. The qRT-PCR was performed using the Light Cycler®480 Sequence Detection System (Roche, Switzerland) with a 384-well plate. Each reaction involved a 3 min denaturation step at 94 °C, then 40 cycles of 94 °C for 15 s, 52 °C for 15 s, 72 °C for 30 s, and 85 °C for 1 s to collect fluorescent signals, then a stepwise temperature increase from 52 °C to 99 °C to establish the melting curve. Standard curves were constructed using a series of 10-fold dilutions of quantified pMD®18-T Simple vector (TaKaRa, China) for each of the target genes. For all target genes, 18S rRNA was used as the reference gene. All the data were expressed as mean ± standard error of mean (S.E.M) and evaluated by one-way analysis of variance (ANOVA) followed by the Duncan's multiple-range tests. Results were considered to be statistically significant when P-value < 0.05. All statistical analyses were carried out using SPSS for Windows, Version 20 (SPSS, Chicago, IL, USA).

Using real-time PCR technique, the expressions of *pastn* genes were investigated seahorse pregnancy. We found the expressions of *pastn* genes are very dynamic during seahorse pregnancy.

Real-time PCR showed that *pastn3* and *pastn5* were widely expressed in female and male seahorse peripheral tissues, and *pastn1*, *pastn2* and *pastn6* were only expressed in female ovary and male brood pouch (**Supplementary Figure 10.2**). Overall, an increased expression of patriscin genes was observed in brood pouch of male seahorse and the ovary of female seahorse than in other tissues.

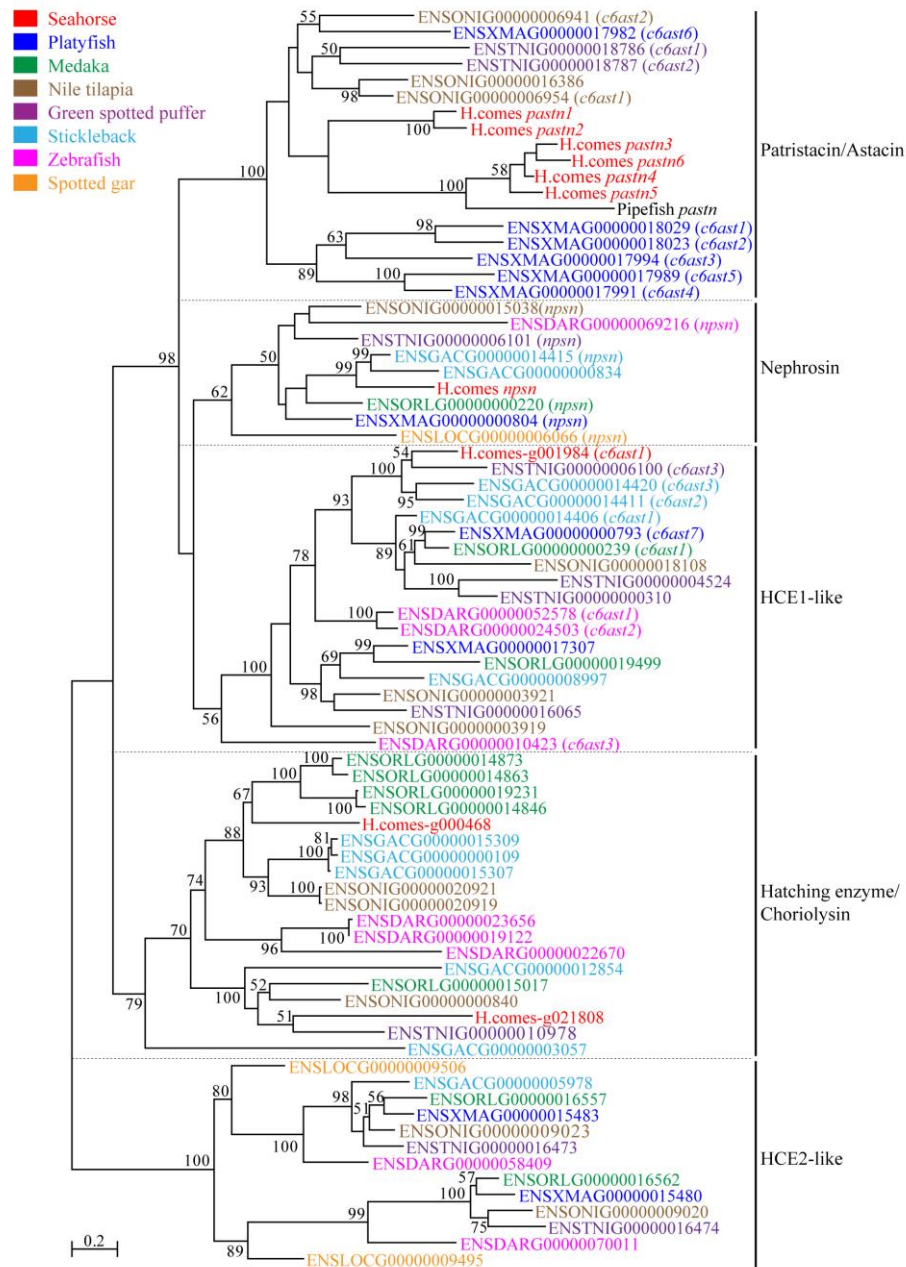

### Supplementary Figure 10.1 Phylogenetic tree of astacin family genes in teleosts.

The *cbast* proteins in the teleost fishes were aligned using the online version Muscle. The phylogeny tree was constructed using PhyML software with the model of “WAG +gamma”.



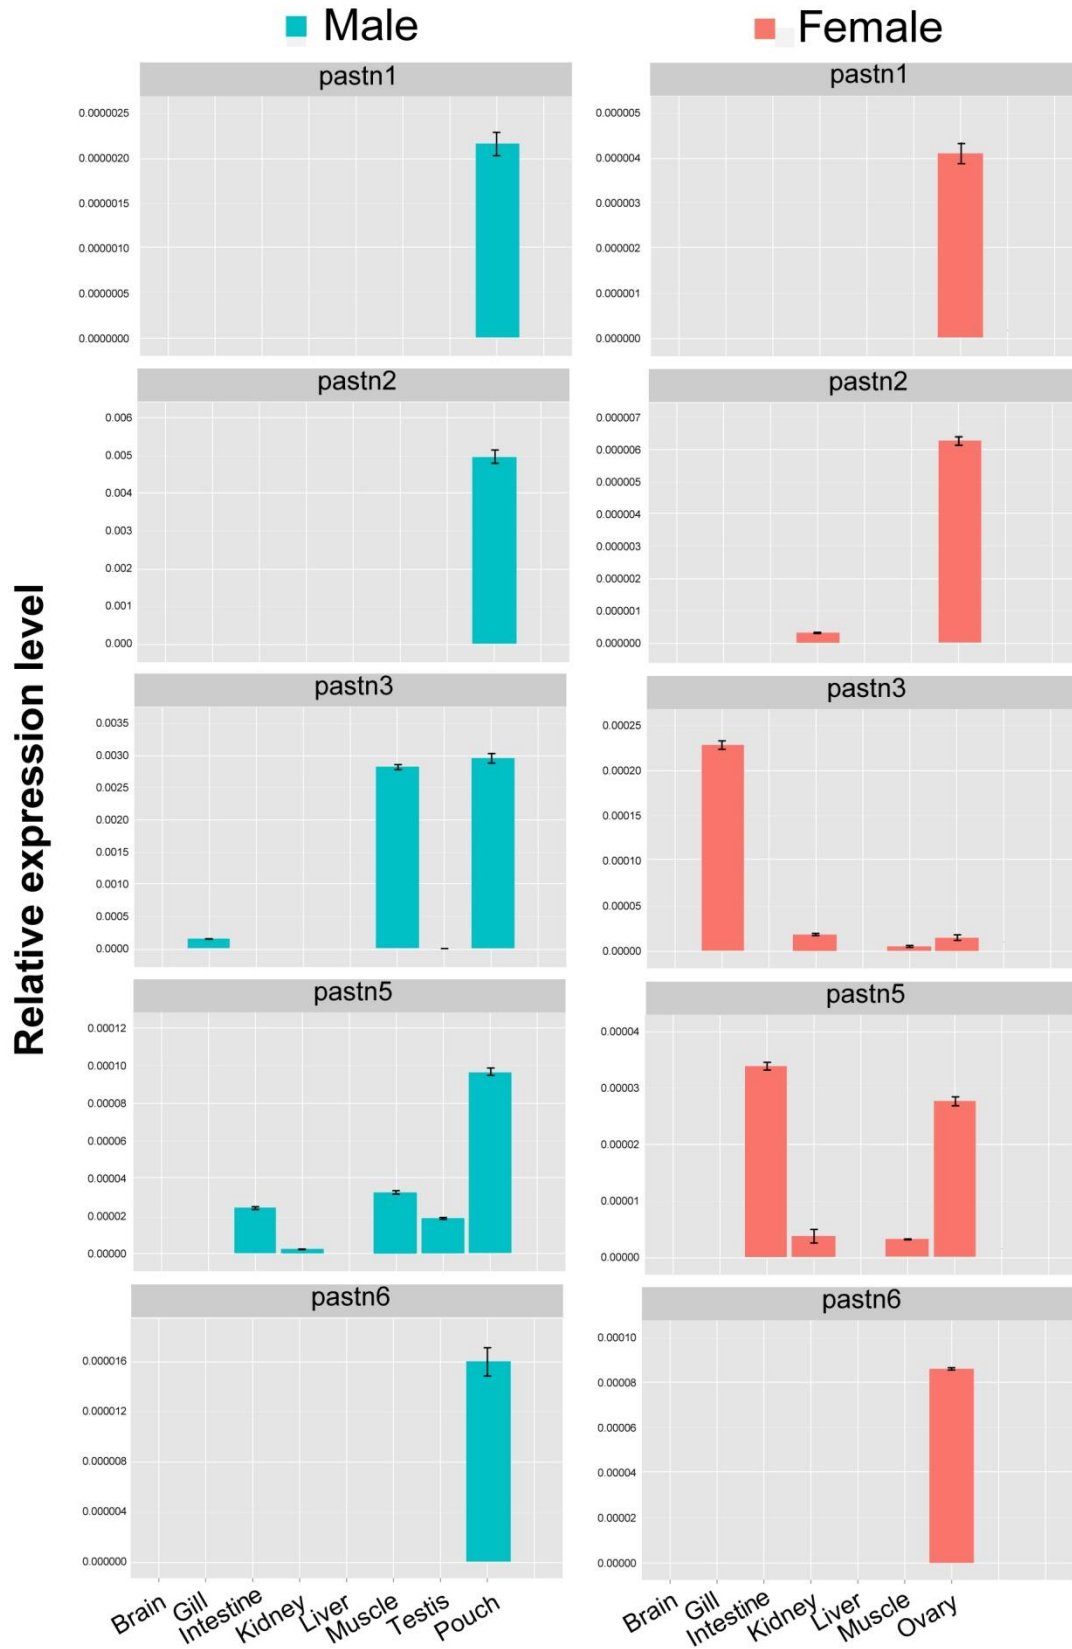

**Supplementary Figure 10.2** The expression profile of *pastn* genes in seahorse (*Hippocampus erectus*). The gene expression levels were quantified by real-time PCR

and the results were expressed as copy numbers normalized by the mean copy number from the reference gene 18S rRNA.

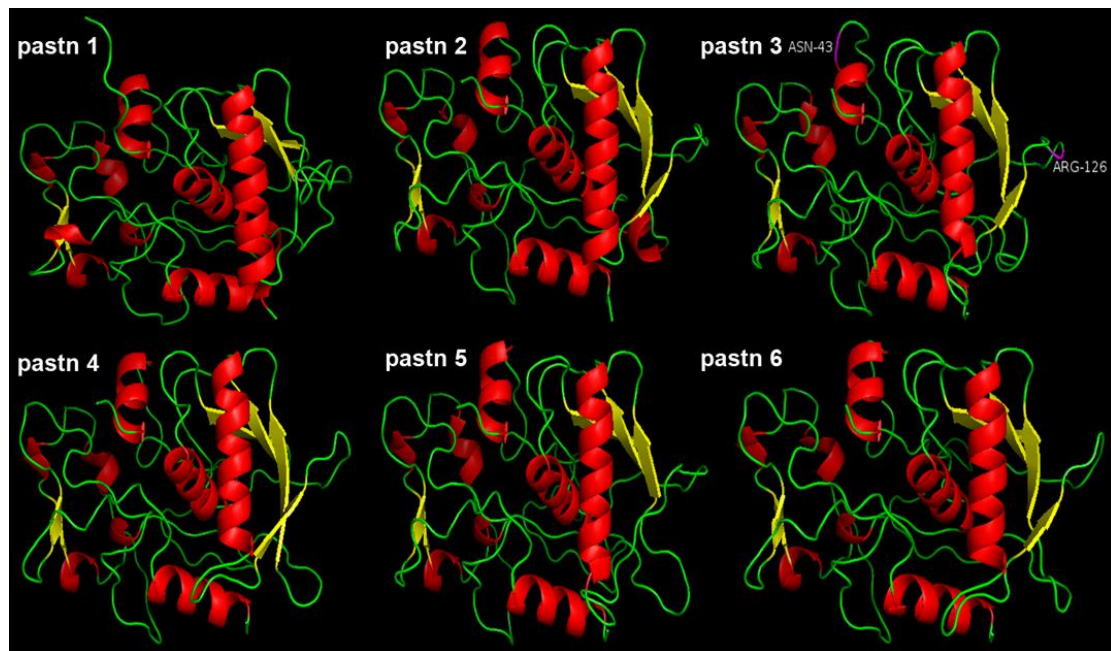

**Supplementary Figure 10.3** 3D models of Patristacin proteins. Amino acids under positive selection are highlighted purple.

**Supplementary Table 10.1** Gene IDs of astacin family genes in teleost genomes.

| Number | Gene ID            | Species                       |
|--------|--------------------|-------------------------------|
| 1      | ENSDARG00000010423 | <i>Danio rerio</i>            |
| 2      | ENSDARG00000019122 | <i>Danio rerio</i>            |
| 3      | ENSDARG00000022670 | <i>Danio rerio</i>            |
| 4      | ENSDARG00000023656 | <i>Danio rerio</i>            |
| 5      | ENSDARG00000024503 | <i>Danio rerio</i>            |
| 6      | ENSDARG00000052578 | <i>Danio rerio</i>            |
| 7      | ENSDARG00000058409 | <i>Danio rerio</i>            |
| 8      | ENSDARG00000069216 | <i>Danio rerio</i>            |
| 9      | ENSDARG00000070011 | <i>Danio rerio</i>            |
| 10     | ENSGACG00000000109 | <i>Gasterosteus aculeatus</i> |
| 11     | ENSGACG00000000834 | <i>Gasterosteus aculeatus</i> |
| 12     | ENSGACG00000003057 | <i>Gasterosteus aculeatus</i> |
| 13     | ENSGACG00000005978 | <i>Gasterosteus aculeatus</i> |
| 14     | ENSGACG00000008997 | <i>Gasterosteus aculeatus</i> |
| 15     | ENSGACG00000012854 | <i>Gasterosteus aculeatus</i> |

---

|    |                     |                               |
|----|---------------------|-------------------------------|
| 16 | ENSGACG00000014406  | <i>Gasterosteus aculeatus</i> |
| 17 | ENSGACG00000014411  | <i>Gasterosteus aculeatus</i> |
| 18 | ENSGACG00000014415  | <i>Gasterosteus aculeatus</i> |
| 19 | ENSGACG00000014420  | <i>Gasterosteus aculeatus</i> |
| 20 | ENSGACG00000015307  | <i>Gasterosteus aculeatus</i> |
| 21 | ENSGACG00000015309  | <i>Gasterosteus aculeatus</i> |
| 22 | ENSLOCG00000006066  | <i>Lepisosteus oculatus</i>   |
| 23 | ENSLOCG00000009495  | <i>Lepisosteus oculatus</i>   |
| 24 | ENSLOCG00000009506  | <i>Lepisosteus oculatus</i>   |
| 25 | ENSONIG00000000840  | <i>Oreochromis niloticus</i>  |
| 26 | ENSONIG000000003919 | <i>Oreochromis niloticus</i>  |
| 27 | ENSONIG000000003921 | <i>Oreochromis niloticus</i>  |
| 28 | ENSONIG00000006941  | <i>Oreochromis niloticus</i>  |
| 29 | ENSONIG00000006954  | <i>Oreochromis niloticus</i>  |
| 30 | ENSONIG00000009020  | <i>Oreochromis niloticus</i>  |
| 31 | ENSONIG00000009023  | <i>Oreochromis niloticus</i>  |
| 32 | ENSONIG00000015038  | <i>Oreochromis niloticus</i>  |
| 33 | ENSONIG00000016386  | <i>Oreochromis niloticus</i>  |
| 34 | ENSONIG00000018108  | <i>Oreochromis niloticus</i>  |
| 35 | ENSONIG00000020919  | <i>Oreochromis niloticus</i>  |
| 36 | ENSONIG00000020921  | <i>Oreochromis niloticus</i>  |
| 37 | ENSORLG00000000220  | <i>Oryzias latipes</i>        |
| 38 | ENSORLG00000000239  | <i>Oryzias latipes</i>        |
| 39 | ENSORLG00000014846  | <i>Oryzias latipes</i>        |
| 40 | ENSORLG00000014863  | <i>Oryzias latipes</i>        |
| 41 | ENSORLG00000014873  | <i>Oryzias latipes</i>        |
| 42 | ENSORLG00000015017  | <i>Oryzias latipes</i>        |
| 43 | ENSORLG00000016557  | <i>Oryzias latipes</i>        |
| 44 | ENSORLG00000016562  | <i>Oryzias latipes</i>        |
| 45 | ENSORLG00000019231  | <i>Oryzias latipes</i>        |
| 46 | ENSORLG00000019499  | <i>Oryzias latipes</i>        |
| 47 | ENSTNIG00000000310  | <i>Tetraodon nigroviridis</i> |
| 48 | ENSTNIG00000004524  | <i>Tetraodon nigroviridis</i> |
| 49 | ENSTNIG00000006100  | <i>Tetraodon nigroviridis</i> |
| 50 | ENSTNIG00000006101  | <i>Tetraodon nigroviridis</i> |
| 51 | ENSTNIG00000010978  | <i>Tetraodon nigroviridis</i> |
| 52 | ENSTNIG00000016065  | <i>Tetraodon nigroviridis</i> |
| 53 | ENSTNIG00000016473  | <i>Tetraodon nigroviridis</i> |
| 54 | ENSTNIG00000016474  | <i>Tetraodon nigroviridis</i> |
| 55 | ENSTNIG00000018786  | <i>Tetraodon nigroviridis</i> |
| 56 | ENSTNIG00000018787  | <i>Tetraodon nigroviridis</i> |
| 57 | ENSXMAG00000000793  | <i>Xiphophorus maculatus</i>  |

---

|    |                    |                              |
|----|--------------------|------------------------------|
| 58 | ENSXMAG0000000804  | <i>Xiphophorus maculatus</i> |
| 59 | ENSXMAG00000015480 | <i>Xiphophorus maculatus</i> |
| 60 | ENSXMAG00000015483 | <i>Xiphophorus maculatus</i> |
| 61 | ENSXMAG00000017307 | <i>Xiphophorus maculatus</i> |
| 62 | ENSXMAG00000017982 | <i>Xiphophorus maculatus</i> |
| 63 | ENSXMAG00000017989 | <i>Xiphophorus maculatus</i> |
| 64 | ENSXMAG00000017991 | <i>Xiphophorus maculatus</i> |
| 65 | ENSXMAG00000017994 | <i>Xiphophorus maculatus</i> |
| 66 | ENSXMAG00000018023 | <i>Xiphophorus maculatus</i> |
| 67 | ENSXMAG00000018029 | <i>Xiphophorus maculatus</i> |
| 68 | ABK80843.1         | <i>Syngnathid scovelli</i>   |
| 69 | H.comes.g013955    | <i>Hippocampus comes</i>     |
| 70 | H.comes.g01395D2   | <i>Hippocampus comes</i>     |
| 71 | H.comes.g01395D3   | <i>Hippocampus comes</i>     |
| 72 | H.comes.g01395D4   | <i>Hippocampus comes</i>     |
| 73 | H.comes.g013953    | <i>Hippocampus comes</i>     |
| 74 | H.comes.g013953D2  | <i>Hippocampus comes</i>     |
| 75 | H.comes.npsn       | <i>Hippocampus comes</i>     |
| 76 | H.comes.g001984    | <i>Hippocampus comes</i>     |
| 77 | H.comes.g021808    | <i>Hippocampus comes</i>     |
| 78 | H.comes.g000468    | <i>Hippocampus comes</i>     |

**Supplementary Table 10.2** Selection pressure on *patristacin* genes in seahorse (*H. comes*) and pipefish.

| Gene name               | $\omega$ f | Null          | Alternative   | LRT      | P-value |
|-------------------------|------------|---------------|---------------|----------|---------|
| <i>pastn1</i>           | 6.93564    | -13439.46497  | -13439.32634  | 0.277248 | NS      |
| <i>pastn2</i>           | 1.12997    | -13439.5027   | -13439.50041  | 0.004588 | NS      |
| <i>pastn3</i>           | 33.50007   | -13439.15397  | -13434.53619  | 9.235566 | <0.01   |
| <i>pastn4</i>           | 29.45181   | -13439.86765  | -13438.69947  | 2.336372 | NS      |
| <i>pastn5</i>           | 3.76168    | -13439.53419  | -13439.39599  | 0.276392 | NS      |
| <i>pastn6</i>           | 1          | -13440.02094  | -13440.02094  | 0        | NS      |
| <i>pastn_S.scovelli</i> | 1          | -13440.020942 | -13440.020942 | 0        | NS      |

$\omega$ f: selection pressure on the foreground branch

Null: likelihood under null hypothesis

Alternative: likelihood under alternative hypothesis

LRT: likelihood ratio test

NS: "Not Significance" with P-value > 0.05

## 11. References

- 1 Li, R. Q. *et al.* The sequence and de novo assembly of the giant panda genome. *Nature* **463**, 311-317, doi:Doi 10.1038/Nature08696 (2010).
- 2 Luo, R. *et al.* SOAPdenovo2: an empirically improved memory-efficient short-read de novo assembler. *Gigascience* **1**, 18, doi:10.1186/2047-217X-1-18 (2012).
- 3 Parra, G., Bradnam, K. & Korf, I. CEGMA: a pipeline to accurately annotate core genes in eukaryotic genomes. *Bioinformatics* **23**, 1061-1067, doi:10.1093/bioinformatics/btm071 (2007).
- 4 Li, H. & Durbin, R. Fast and accurate short read alignment with Burrows-Wheeler transform. *Bioinformatics* **25**, 1754-1760, doi:10.1093/bioinformatics/btp324 (2009).
- 5 Grabherr, M. G. *et al.* Full-length transcriptome assembly from RNA-Seq data without a reference genome. *Nature Biotechnology* **29**, 644-U130, doi:Doi 10.1038/Nbt.1883 (2011).
- 6 Kent, W. J. BLAT - The BLAST-like alignment tool. *Genome Research* **12**, 656-664, doi:Doi 10.1101/Gr.229202 (2002).
- 7 Trapnell, C., Pachter, L. & Salzberg, S. L. TopHat: discovering splice junctions with RNA-Seq. *Bioinformatics* **25**, 1105-1111, doi:DOI 10.1093/bioinformatics/btp120 (2009).
- 8 Benson, G. Tandem repeats finder: a program to analyze DNA sequences. *Nucleic Acids Res* **27**, 573-580, doi:Doi 10.1093/Nar/27.2.573 (1999).
- 9 Jurka, J. *et al.* Repbase update, a database of eukaryotic repetitive elements. *Cytogenet Genome Res* **110**, 462-467, doi:Doi 10.1159/000084979 (2005).
- 10 Bao, Z. & Eddy, S. R. Automated de novo identification of repeat sequence families in sequenced genomes. *Genome Research* **12**, 1269-1276, doi:10.1101/gr.88502 (2002).
- 11 Price, A. L., Jones, N. C. & Pevzner, P. A. De novo identification of repeat families in large genomes. *Bioinformatics* **21**, 1351-1358, doi:DOI 10.1093/bioinformatics/bti1018 (2005).
- 12 Kimura, M. A simple method for estimating evolutionary rates of base substitutions through comparative studies of nucleotide sequences. *Journal of Molecular Evolution* **16**, 111-120 (1980).
- 13 Volff, J. N. Genome evolution and biodiversity in teleost fish. *Heredity* **94**, 280-294, doi:Doi 10.1038/Sj.Hdy.6800635 (2005).
- 14 Howe, K. *et al.* The zebrafish reference genome sequence and its relationship to the human genome. *Nature* **496**, 498-503, doi:10.1038/nature12111 (2013).
- 15 Aparicio, S. *et al.* Whole-genome shotgun assembly and analysis of the genome of *Fugu rubripes*. *Science* **297**, 1301-1310, doi:10.1126/science.1072104 (2002).
- 16 Kasahara, M. *et al.* The medaka draft genome and insights into vertebrate genome evolution. *Nature* **447**, 714-719, doi:Doi 10.1038/Nature05846 (2007).
- 17 Star, B. *et al.* The genome sequence of Atlantic cod reveals a unique immune system. *Nature* **477**, 207-210, doi:Doi 10.1038/Nature10342 (2011).
- 18 Brawand, D. *et al.* The genomic substrate for adaptive radiation in African cichlid fish. *Nature* **513**, 375-381, doi:10.1038/nature13726 (2014).
- 19 Schartl, M. *et al.* The genome of the platyfish, *Xiphophorus maculatus*, provides insights into evolutionary adaptation and several complex traits. *Nature Genetics* **45**, 567-572,

- doi:10.1038/ng.2604 (2013).
- 20 Jones, F. C. *et al.* The genomic basis of adaptive evolution in threespine sticklebacks. *Nature* **484**, 55-61, doi:10.1038/nature10944 (2012).
- 21 You, X. *et al.* Mudskipper genomes provide insights into the terrestrial adaptation of amphibious fishes. *Nature communications* **5**, 5594, doi:10.1038/ncomms6594 (2014).
- 22 Trapnell, C. *et al.* Transcript assembly and quantification by RNA-Seq reveals unannotated transcripts and isoform switching during cell differentiation. *Nature Biotechnology* **28**, 511-U174, doi:Doi 10.1038/Nbt.1621 (2010).
- 23 Bairoch, A. & Apweiler, R. The SWISS-PROT protein sequence database and its supplement TrEMBL in 2000. *Nucleic Acids Res* **28**, 45-48 (2000).
- 24 Kanehisa, M., Sato, Y., Kawashima, M., Furumichi, M. & Tanabe, M. KEGG as a reference resource for gene and protein annotation. *Nucleic Acids Res*, doi:10.1093/nar/gkv1070 (2015).
- 25 Mitchell, A. *et al.* The InterPro protein families database: the classification resource after 15 years. *Nucleic Acids Res* **43**, D213-221, doi:10.1093/nar/gku1243 (2015).
- 26 Ashburner, M. *et al.* Gene ontology: tool for the unification of biology. The Gene Ontology Consortium. *Nature Genetics* **25**, 25-29, doi:10.1038/75556 (2000).
- 27 Conesa, A. *et al.* Blast2GO: a universal tool for annotation, visualization and analysis in functional genomics research. *Bioinformatics* **21**, 3674-3676, doi:doi: 10.1093/bioinformatics/bti610 (2005).
- 28 Gotz, S. *et al.* High-throughput functional annotation and data mining with the Blast2GO suite. *Nucleic Acids Res* **36**, 3420-3435, doi:10.1093/nar/gkn176 (2008).
- 29 Yu, X., Lin, J., Zack, D. J. & Qian, J. Computational analysis of tissue-specific combinatorial gene regulation: predicting interaction between transcription factors in human tissues. *Nucleic Acids Res* **34**, 4925-4936, doi:10.1093/nar/gkl595 (2006).
- 30 Tarazona, S., Garcia-Alcalde, F., Dopazo, J., Ferrer, A. & Conesa, A. Differential expression in RNA-seq: A matter of depth. *Genome Research* **21**, 2213-2223, doi:DOI 10.1101/gr.124321.111 (2011).
- 31 Small, C. M., Harlin-Cognato, A. D. & Jones, A. G. Functional similarity and molecular divergence of a novel reproductive transcriptome in two male-pregnant Syngnathus pipefish species. *Ecology and evolution* **3**, 4092-4108, doi:10.1002/ece3.763 (2013).
- 32 Hubbard, T. *et al.* The Ensembl genome database project. *Nucleic Acids Res* **30**, 38-41 (2002).
- 33 Altschul, S. F., Gish, W., Miller, W., Myers, E. W. & Lipman, D. J. Basic local alignment search tool. *Journal of Molecular Biology* **215**, 403-410, doi:10.1016/S0022-2836(05)80360-2 (1990).
- 34 Edgar, R. C. MUSCLE: multiple sequence alignment with high accuracy and high throughput. *Nucleic Acids Res* **32**, 1792-1797, doi:Doi 10.1093/Nar/Gkh340 (2004).
- 35 Capella-Gutierrez, S., Silla-Martinez, J. M. & Gabaldon, T. trimAl: a tool for automated alignment trimming in large-scale phylogenetic analyses. *Bioinformatics* **25**, 1972-1973, doi:10.1093/bioinformatics/btp348 (2009).
- 36 Stamatakis, A. RAxML-VI-HPC: Maximum likelihood-based phylogenetic analyses with thousands of taxa and mixed models. *Bioinformatics* **22**, 2688-2690, doi:Doi 10.1093/Bioinformatics/Btl446 (2006).



- 37 Stamatakis, A., Hoover, P. & Rougemont, J. A Rapid Bootstrap Algorithm for the RAxML Web Servers. *Syst Biol* **57**, 758-771, doi:Doi 10.1080/10635150802429642 (2008).
- 38 Paradis, E., Claude, J. & Strimmer, K. APE: Analyses of Phylogenetics and Evolution in R language. *Bioinformatics* **20**, 289-290 (2004).
- 39 Tajima, F. Statistical method for testing the neutral mutation hypothesis by DNA polymorphism. *Genetics* **123**, 585-595 (1989).
- 40 Nei, M. & Kumar, S. *Molecular evolution and phylogenetics*. (Oxford University Press, 2000).
- 41 Takezaki, N., Rzhetsky, A. & Nei, M. Phylogenetic test of the molecular clock and linearized trees. *Molecular Biology and Evolution* **12**, 823-833 (1995).
- 42 Zhang, J., Nielsen, R. & Yang, Z. Evaluation of an improved branch-site likelihood method for detecting positive selection at the molecular level. *Molecular Biology and Evolution* **22**, 2472-2479, doi:10.1093/molbev/msi237 (2005).
- 43 Yang, Z. PAML 4: phylogenetic analysis by maximum likelihood. *Molecular Biology and Evolution* **24**, 1586-1591, doi:doi: 10.1093/molbev/msm088 (2007).
- 44 Harris, R. S. Improved pairwise alignment of genomic DNA. *The Pennsylvania State University, The Graduate School, College of Engineering* (2007).
- 45 Blanchette, M. *et al.* Aligning multiple genomic sequences with the threaded blockset aligner. *Genome Research* **14**, 708-715, doi:10.1101/gr.1933104 (2004).
- 46 Betancur, R. R. *et al.* The tree of life and a new classification of bony fishes. *PLoS Curr* **5**, doi:10.1371/currents.tol.53ba26640df0c8ae75bb165c8c26288 (2013).
- 47 Near, T. J. *et al.* Phylogeny and tempo of diversification in the superradiation of spiny-rayed fishes. *Proc Natl Acad Sci U S A* **110**, 12738-12743, doi:10.1073/pnas.1304661110 (2013).
- 48 Hubisz, M. J., Pollard, K. S. & Siepel, A. PHAST and RPHAST: phylogenetic analysis with space/time models. *Briefings in Bioinformatics* **12**, 41-51, doi:10.1093/bib/bbq072 (2011).
- 49 McLean, C. Y. *et al.* GREAT improves functional interpretation of cis-regulatory regions. *Nature biotechnology* **28**, 495-501, doi:10.1038/nbt.1630 (2010).
- 50 Brudno, M. *et al.* LAGAN and Multi-LAGAN: efficient tools for large-scale multiple alignment of genomic DNA. *Genome research* **13**, 721-731, doi:10.1101/gr.926603 (2003).
- 51 Frazer, K. A., Pachter, L., Poliakov, A., Rubin, E. M. & Dubchak, I. VISTA: computational tools for comparative genomics. *Nucleic Acids Res* **32**, W273-279, doi:10.1093/nar/gkh458 (2004).
- 52 Nelson, J. S. *Fishes of the World*. 4th edn, (John Wiley & Sons, 2006).
- 53 Sweetman, D. & Munsterberg, A. The vertebrate spalt genes in development and disease. *Dev Biol* **293**, 285-293, doi:10.1016/j.ydbio.2006.02.009 (2006).
- 54 Farrell, E. R. & Munsterberg, A. E. *csal1* is controlled by a combination of FGF and Wnt signals in developing limb buds. *Dev Biol* **225**, 447-458, doi:10.1006/dbio.2000.9852 (2000).
- 55 Harvey, S. A. & Logan, M. P. *sall4* acts downstream of *tbx5* and is required for pectoral fin outgrowth. *Development* **133**, 1165-1173, doi:10.1242/dev.02259 (2006).
- 56 Shears, D. J. *et al.* Mutation and deletion of the pseudoautosomal gene SHOX cause Leri-Weill dyschondrosteosis. *Nature Genetics* **19**, 70-73, doi:10.1038/ng0198-70 (1998).
- 57 Sabherwal, N. *et al.* Long-range conserved non-coding SHOX sequences regulate expression in developing chicken limb and are associated with short stature phenotypes in human patients. *Hum Mol Genet* **16**, 210-222, doi:10.1093/hmg/ddl470 (2007).

- 58 Kenyon, E. J., McEwen, G. K., Callaway, H. & Elgar, G. Functional analysis of conserved non-coding regions around the short stature hox gene (shox) in whole zebrafish embryos. *PLoS One* **6**, e21498, doi:10.1371/journal.pone.0021498 (2011).
- 59 Li, D. *et al.* Formation of proximal and anterior limb skeleton requires early function of *Irx3* and *Irx5* and is negatively regulated by *Shh* signaling. *Dev Cell* **29**, 233-240, doi:10.1016/j.devcel.2014.03.001 (2014).
- 60 Cheng, C. W. *et al.* The Iroquois homeobox gene, *Irx5*, is required for retinal cone bipolar cell development. *Dev Biol* **287**, 48-60, doi:10.1016/j.ydbio.2005.08.029 (2005).
- 61 Costantini, D. L. *et al.* The homeodomain transcription factor *Irx5* establishes the mouse cardiac ventricular repolarization gradient. *Cell* **123**, 347-358, doi:10.1016/j.cell.2005.08.004 (2005).
- 62 Bonnard, C. *et al.* Mutations in *IRX5* impair craniofacial development and germ cell migration via *SDF1*. *Nat Genet* **44**, 709-713, doi:10.1038/ng.2259 (2012).
- 63 Alexander, T., Nolte, C. & Krumlauf, R. Hox genes and segmentation of the hindbrain and axial skeleton. *Annu Rev Cell Dev Biol* **25**, 431-456, doi:10.1146/annurev.cellbio.042308.113423 (2009).
- 64 Zakany, J. & Duboule, D. The role of Hox genes during vertebrate limb development. *Curr Opin Genet Dev* **17**, 359-366, doi:10.1016/j.gde.2007.05.011 (2007).
- 65 Lynch, V. J. *et al.* Adaptive changes in the transcription factor *HoxA-11* are essential for the evolution of pregnancy in mammals. *P Natl Acad Sci USA* **105**, 14928-14933, doi:10.1073/pnas.0802355105 (2008).
- 66 Yang, Z. H., Wong, W. S. W. & Nielsen, R. Bayes empirical Bayes inference of amino acid sites under positive selection. *Molecular Biology and Evolution* **22**, 1107-1118, doi:DOI 10.1093/molbev/msi097 (2005).
- 67 Couly, G., Creuzet, S., Bennaceur, S., Vincent, C. & Le Douarin, N. M. Interactions between Hox-negative cephalic neural crest cells and the foregut endoderm in patterning the facial skeleton in the vertebrate head. *Development* **129**, 1061-1073 (2002).
- 68 Oury, F. *et al.* *Hoxa2*- and rhombomere-dependent development of the mouse facial somatosensory map. *Science* **313**, 1408-1413, doi:10.1126/science.1130042 (2006).
- 69 Bobola, N. *et al.* Mesenchymal patterning by *Hoxa2* requires blocking Fgf-dependent activation of *Ptx1*. *Development* **130**, 3403-3414 (2003).
- 70 Kanzler, B., Kuschert, S. J., Liu, Y. H. & Mallo, M. *Hoxa-2* restricts the chondrogenic domain and inhibits bone formation during development of the branchial area. *Development* **125**, 2587-2597 (1998).
- 71 Donaldson, I. J. *et al.* Genome-wide occupancy links *Hoxa2* to Wnt-beta-catenin signaling in mouse embryonic development. *Nucleic Acids Res* **40**, 3990-4001, doi:10.1093/nar/gkr1240 (2012).
- 72 Horan, G. S., Wu, K., Wolgemuth, D. J. & Behringer, R. R. Homeotic transformation of cervical vertebrae in *Hoxa-4* mutant mice. *P Natl Acad Sci USA* **91**, 12644-12648 (1994).
- 73 Niimura, Y. & Nei, M. Evolutionary dynamics of olfactory receptor genes in fishes and tetrapods. *P Natl Acad Sci USA* **102**, 6039-6044, doi:DOI 10.1073/pnas.0501922102 (2005).
- 74 Niimura, Y. On the Origin and Evolution of Vertebrate Olfactory Receptor Genes: Comparative



- Genome Analysis Among 23 Chordate Species. *Genome Biol Evol* **1**, 34-44, doi:Doi 10.1093/Gbe/Evp003 (2009).
- 75 Niimura, Y. Evolutionary dynamics of olfactory receptor genes in chordates: interaction between environments and genomic contents. *Human genomics* **4**, 107 (2009).
- 76 Lindqvist, C., Sundin, J., Berglund, A. & Rosenqvist, G. Male broad-nosed pipefish *Syngnathus typhle* do not locate females by smell. *Journal of fish biology* **78**, 1861-1867, doi:10.1111/j.1095-8649.2011.02985.x (2011).
- 77 Infante, C. R. *et al.* Shared Enhancer Activity in the Limbs and Phallus and Functional Divergence of a Limb-Genital cis-Regulatory Element in Snakes. *Developmental cell* **35**, 107-119, doi:10.1016/j.devcel.2015.09.003 (2015).
- 78 Menke, D. B., Guenther, C. & Kingsley, D. M. Dual hindlimb control elements in the *Tbx4* gene and region-specific control of bone size in vertebrate limbs. *Development* **135**, 2543-2553, doi:10.1242/dev.017384 (2008).
- 79 Jao, L. E., Wente, S. R. & Chen, W. Efficient multiplex biallelic zebrafish genome editing using a CRISPR nuclease system. *Proc Natl Acad Sci U S A* **110**, 13904-13909, doi:10.1073/pnas.1308335110 (2013).
- 80 Don, E. K. *et al.* Genetic basis of hindlimb loss in a naturally occurring vertebrate model. *Biol Open*, doi:bio.016295 [pii] 10.1242/bio.016295 (2016).
- 81 Winterbottom, R. Descriptive Synonymy of Striated Muscles of Teleostei. *P Acad Nat Sci Phila* **125**, 225-317 (1973).
- 82 Neutens, C. *et al.* Grasping convergent evolution in syngnathids: a unique tale of tails. *J Anat* **224**, 710-723, doi:10.1111/joa.12181 (2014).
- 83 Kawasaki, K., Buchanan, A. V. & Weiss, K. M. Gene duplication and the evolution of vertebrate skeletal mineralization. *Cells Tissues Organs* **186**, 7-24, doi:10.1159/000102678 (2007).
- 84 Kawasaki, K. The SCPP gene family and the complexity of hard tissues in vertebrates. *Cells Tissues Organs* **194**, 108-112, doi:10.1159/000324225 (2011).
- 85 Venkatesh, B. *et al.* Elephant shark genome provides unique insights into gnathostome evolution. *Nature* **505**, 174-179, doi:10.1038/nature12826 (2014).
- 86 Kawasaki, K. & Amemiya, C. T. SCPP genes in the coelacanth: tissue mineralization genes shared by sarcopterygians. *J Exp Zool B Mol Dev Evol* **322**, 390-402 (2014).
- 87 Kawasaki, K. The SCPP gene repertoire in bony vertebrates and graded differences in mineralized tissues. *Development genes and evolution* **219**, 147-157, doi:10.1007/s00427-009-0276-x (2009).
- 88 Louchart, A. & Viriot, L. From snout to beak: the loss of teeth in birds. *Trends Ecol Evol* **26**, 663-673, doi:10.1016/j.tree.2011.09.004 (2011).
- 89 Meredith, R. W., Zhang, G., Gilbert, M. T., Jarvis, E. D. & Springer, M. S. Evidence for a single loss of mineralized teeth in the common avian ancestor. *Science* **346**, 1254390, doi:10.1126/science.1254390 (2014).
- 90 Demere, T. A., McGowen, M. R., Berta, A. & Gatesy, J. Morphological and molecular evidence for a stepwise evolutionary transition from teeth to baleen in mysticete whales. *Syst Biol* **57**, 15-37, doi:10.1080/10635150701884632 (2008).

- 91 Zhang, G. *et al.* Comparative genomics reveals insights into avian genome evolution and adaptation. *Science* **346**, 1311-1320, doi:10.1126/science.1251385 (2014).
- 92 Solovyev, V., Kosarev, P., Seledsov, I. & Vorobyev, D. Automatic annotation of eukaryotic genes, pseudogenes and promoters. *Genome Biol* **7 Suppl 1**, S10 11-12, doi:10.1186/gb-2006-7-s1-s10 (2006).
- 93 Edgar, R. C. MUSCLE: multiple sequence alignment with high accuracy and high throughput. *Nucleic acids research* **32**, 1792-1797, doi:10.1093/nar/gkh340 (2004).
- 94 Guindon, S. *et al.* New algorithms and methods to estimate maximum-likelihood phylogenies: assessing the performance of PhyML 3.0. *Syst Biol* **59**, 307-321, doi:10.1093/sysbio/syq010 (2010).
